# Supplementary material for: Tumor MHC Class I Expression Associates with Intralesional IL2 Response in Melanoma
Source: Oxford University Press journal article supplement (doi:10.1158/2326-6066.cir-21-1083), 2022-01-10
Supplement: cir-21-1083_supplementary_data_supp2.xlsx [file cir-21-1083_supplementary_data_supp2.xlsx]

## Sheet: Sheet1
Patient ID	Age	Gender	Patient Response	Lesion ID	Lesion Site*	No. IL-2 Injections	Interval IL-2 Injection/Lesion Excision (days)	Lesion Response
0	56	Male	Non-Responder	0_1	Left groin	0	NA	UT
				0_2	Left foot	7	21	non-CR
				0_3	Left groin	3	28	CR
1	81	Female	Non-Responder	1_1	Right leg	0	NA	UT
				1_2	Right leg	12	134	non-CR
				1_3	Right leg	2	288	CR
2	67	Female	Non-Responder	2_1	Right leg	0	NA	UT
				2_2	Right leg	3	23	non-CR
				2_3	Right leg	3	23	non-CR
				2_4	Right leg	3	23	non-CR
3	86	Female	Non-Responder	3_1	Left thigh	0	NA	UT
				3_2	Left thigh	2	126	non-CR
4	42	Male	Extreme responder	4_1	Right chest	0	NA	UT
				4_2	Right chest	0	NA	UT
				4_3	Right chest	5	7	CR
				4_4	Right axilla	4	14	CR
				4_5	Right arm	3	14	CR
				4_6	Right chest	3	21	CR
				4_7	Right axilla	4	14	CR
5	69	Male	Non-Responder	5_1	Left ear	0	NA	UT
				5_2	Left ear	4	78	non-CR
				5_3	Left ear	4	78	non-CR
				5_4	Left ear	4	78	non-CR
6	74	Female	Extreme responder	6_1	Right leg	0	NA	UT
				6_2	Right leg	3	29	CR
				6_3	Right leg	3	29	CR
				6_4	Right leg	0	NA	UT
*Each lesion represents a discrete metastasis.
