# Supplementary material for: Tumor MHC Class I Expression Associates with Intralesional IL2 Response in Melanoma
Source: Oxford University Press journal article supplement (doi:10.1158/2326-6066.cir-21-1083), 2022-01-10
Supplement: cir-21-1083_supplementary_data_supp4.xlsx [file cir-21-1083_supplementary_data_supp4.xlsx]

## Sheet: Sheet1
Cell Type	Cell Subtype	Abbreviation	Marker Positives	Marker Negatives
TumorAll	Tumor	TumorAll	SOX10	CD3,CD4,CD8,FOXP3,CD20
TAll	CD4+ T cell	TCD4	CD3,CD4	CD8,FOXP3,CD20,CD56,SOX10
	CD8+ T cell	TCD8	CD3,CD8	CD4,FOXP3,CD20,CD56,SOX10
	CD4+ regulatory T cell	Treg4	CD3,CD4,FOXP3	CD8,CD20,CD56,SOX10
	CD8+ regulatory T cell	Treg8	CD3,CD8,FOXP3	CD4,CD20,CD56,SOX10
	Double negative regulatory T cell	TregDN	CD3,FOXP3	CD4,CD8,CD20,CD56,SOX10
	CD4+/CD8+ T cell	TCD4/CD8	CD3,CD4,CD8	FOXP3,CD20,CD56,SOX10
	T cell/null phenotype	Tnull	CD3	CD4,CD8,FOXP3,CD20,CD56,SOX10
BAll	B cell	BAll	CD20	CD3,CD4,CD8,FOXP3,CD56,SOX10
NKAll	Natural killer cell	NK	CD56	CD3,CD4,CD8,FOXP3,CD20,SOX10,S100B
	Natural killer T cell	NKT	CD3,CD56	CD4,CD8,FOXP3,CD20,SOX10
	Natural killer T cell/CD8+	NKTCD8	CD3,CD8,CD56	CD4,FOXP3,CD20,SOX10
	Natural killer T cell/CD4+	NKTCD4	CD3,CD4,CD56	CD8,FOXP3,CD20,SOX10
MΦAll	MHCII+ macrophage	MΦMHCII+	MHCII, CD68 and/or CD163	CD3,CD8,FOXP3,CD20,CD56,SOX10
	MHCII- macrophage	MΦMHCII-	CD68 and/or CD163	CD3,CD8,FOXP3,CD20,CD56,SOX10,MHCII
	Other macrophage/monocyte	MΦOther	CD14 and/or CD4	CD3,CD8,FOXP3,CD20,CD56,CD163,CD68,SOX10
LeukocyteOther	Other leukocyte	LeukocyteOther	CD45	CD3,CD4,CD8,FOXP3,CD20,CD56,CD14,CD163,CD68,SOX10,S100B
Other	Adipocyte or Langerhans cell	NA	S100B	CD45,CD3,CD4,CD8,FOXP3,CD20,CD56,CD14,CD163,CD68,SOX10,PCK26
	Epithelial cell	NA	panCK	CD45,CD3,CD4,CD8,FOXP3,CD20,CD56,CD14,CD163,CD68,SOX10,S100B
	Nerve	NA	CD56,S100B	CD3,CD4,CD8,FOXP3,CD20,CD14,CD163,CD68,SOX10
