# Supplementary material for: Tumor MHC Class I Expression Associates with Intralesional IL2 Response in Melanoma
Source: Oxford University Press journal article supplement (doi:10.1158/2326-6066.cir-21-1083), 2022-01-10
Supplement: cir-21-1083_supplementary_data_supp11.xlsx [file cir-21-1083_supplementary_data_supp11.xlsx]

## Sheet: all_fractions (n=685)
ID	Cell State (Numerator)	Population (Denominator)	Cell state cell count	Population cell count	Extreme responder median fraction (n=38)	Non-responder median fraction (n=74)	Odds Ratio	CI.low	CI.high	p.value	adjusted p.value
1	T_CD4,PD1,KI67	T_CD4,PD1	1575	8956	0.205	0.062	3.6	2.03	7.19	9.13e-06	0.00605
2	T_CD4,LAG3,KI67	T_CD4,LAG3	418	1644	0.375	0	10500	3180	14000	8.68e-10	5.75e-07
3	T_CD4,TIM3,KI67	T_CD4,TIM3	2877	29951	0.105	0.0424	2.78	1.97	4.16	1.07e-07	7.12e-05
4	T_CD4,CD27,KI67	T_CD4,CD27	1885	17291	0.11	0.0334	4.5	2.17	930	3.59e-06	0.00238
5	T_CD4,ICOS,KI67	T_CD4,ICOS	2656	13713	0.216	0.0739	3.6	2.32	5.8	4.56e-07	0.000302
6	T_CD4,CD25,KI67	T_CD4,CD25	152	1126	0.2	0	8	1.5	2310	0.000691	0.458
7	T_CD4,MHCII,KI67	T_CD4,MHCII	1941	17532	0.0945	0.0469	2.26	1.59	3.51	2.88e-05	0.0191
8	T_CD4,PD1,LAG3,TIM3,KI67	T_CD4,PD1,LAG3,TIM3	284	835	0.375	0	10900	6360	15300	7.95e-09	5.27e-06
9	T_CD4,PD1,LAG3-,TIM3,KI67	T_CD4,PD1,LAG3-,TIM3	886	4809	0.218	0.0485	4.67	2.22	17.8	1.87e-05	0.0124
10	T_CD4,PD1,LAG3,TIM3-,KI67	T_CD4,PD1,LAG3,TIM3-	24	70	0.429	0	17000	12700	50900	0.000665	0.441
11	T_CD4,PD1-,LAG3,TIM3,KI67	T_CD4,PD1-,LAG3,TIM3	101	633	0.286	0	7270	3.93	10900	7.34e-05	0.0487
12	T_CD4,PD1,LAG3-,TIM3-,KI67	T_CD4,PD1,LAG3-,TIM3-	381	3242	0.167	0	1320	1.58	4240	0.000143	0.095
13	T_CD4,PD1-,LAG3-,TIM3,KI67	T_CD4,PD1-,LAG3-,TIM3	1606	23674	0.0597	0.0303	2.17	1.45	3.22	0.000285	0.189
14	T_CD4,PD1-,LAG3,TIM3-,KI67	T_CD4,PD1-,LAG3,TIM3-	9	106	0.4	0	17000	1	25500	0.00027	0.179
15	T_CD4,PD1-,LAG3-,TIM3-,KI67	T_CD4,PD1-,LAG3-,TIM3-	517	8475	0.0398	0.0202	1.65	1	4.72	0.0441	1
16	T_CD4,KI67	T_CD4	3808	41844	0.0902	0.0431	2.34	1.68	3.34	2.77e-06	0.00184
17	T_CD4,PD1	T_CD4	8956	41844	0.138	0.129	1.38	0.93	2.35	0.101	1
18	T_CD4,LAG3	T_CD4	1644	41844	0.0264	0.0189	1.54	0.959	2.92	0.0712	1
19	T_CD4,TIM3	T_CD4	29951	41844	0.787	0.824	0.815	0.425	1.6	0.517	1
20	T_CD4,CD27	T_CD4	17291	41844	0.427	0.0902	6.49	3.83	10.3	7.05e-10	4.68e-07
21	T_CD4,ICOS	T_CD4	13713	41844	0.353	0.447	0.687	0.432	1.46	0.283	1
22	T_CD4,CD25	T_CD4	1126	41844	0.0103	0.0163	0.69	0.247	1.39	0.261	1
23	T_CD4,MHCII	T_CD4	17532	41844	0.436	0.329	1.7	1.28	2.31	0.000766	0.508
24	T_CD4,PD1,LAG3,TIM3	T_CD4	835	41844	0.018	0.00241	6.59	2.78	252	2.03e-06	0.00135
25	T_CD4,PD1,LAG3-,TIM3	T_CD4	4809	41844	0.108	0.0884	1.29	0.889	2	0.229	1
26	T_CD4,PD1,LAG3,TIM3-	T_CD4	70	41844	0	0	1	1	1	1	1
27	T_CD4,PD1-,LAG3,TIM3	T_CD4	633	41844	0.00961	0.00649	1.08	0.796	2.22	0.431	1
28	T_CD4,PD1,LAG3-,TIM3-	T_CD4	3242	41844	0.0134	0.0161	1	0.435	2.09	0.87	1
29	T_CD4,PD1-,LAG3-,TIM3	T_CD4	23674	41844	0.652	0.635	1.2	0.749	1.94	0.441	1
30	T_CD4,PD1-,LAG3,TIM3-	T_CD4	106	41844	0	0	1	1	1	1	1
31	T_CD4,PD1-,LAG3-,TIM3-	T_CD4	8475	41844	0.174	0.148	1.05	0.563	1.84	0.89	1
32	T_CD4	Immune_All	41844	217350	0.201	0.117	1.82	1.22	2.58	0.00197	1
33	T_CD4	T_All	41844	114998	0.433	0.65	0.365	0.275	0.469	1.81e-07	0.00012
34	T_CD4	T_CD8	41844	57596	1.08	3.07	0.266	0.137	0.466	0.000147	0.0974
35	T_CD4	T_reg4	41844	10263	3.62	7.44
36	T_CD8,PD1,KI67	T_CD8,PD1	6313	21354	0.318	0.0644	9.74	4.48	4130	3.41e-10	2.26e-07
37	T_CD8,LAG3,KI67	T_CD8,LAG3	4563	10781	0.475	0.0927	10.9	5.28	81.1	1.91e-10	1.27e-07
38	T_CD8,TIM3,KI67	T_CD8,TIM3	10570	45647	0.23	0.0522	6.39	3.86	11.4	5.89e-11	3.91e-08
39	T_CD8,CD27,KI67	T_CD8,CD27	10343	36435	0.272	0.0689	7.84	3.98	2120	6.26e-11	4.15e-08
40	T_CD8,ICOS,KI67	T_CD8,ICOS	6043	21415	0.326	0.0128	106	7.23	6850	1.18e-12	7.83e-10
41	T_CD8,CD25,KI67	T_CD8,CD25	197	948	0.235	0.0769	3.11	1	2830	0.0356	1
42	T_CD8,PD1,LAG3,TIM3,KI67	T_CD8,PD1,LAG3,TIM3	2809	6500	0.509	0.17	5.92	3.1	12.9	1.31e-06	0.000867
43	T_CD8,PD1,LAG3-,TIM3,KI67	T_CD8,PD1,LAG3-,TIM3	2751	11071	0.266	0.0714	6.85	3.56	23.8	3.6e-09	2.38e-06
44	T_CD8,PD1,LAG3,TIM3-,KI67	T_CD8,PD1,LAG3,TIM3-	62	147	0.5	0.05	2.4	1	25500	0.0986	1
45	T_CD8,PD1-,LAG3,TIM3,KI67	T_CD8,PD1-,LAG3,TIM3	1656	3876	0.417	0	13400	5090	18200	3.45e-09	2.29e-06
46	T_CD8,PD1,LAG3-,TIM3-,KI67	T_CD8,PD1,LAG3-,TIM3-	691	3636	0.118	0	1.36	1	4.48	0.0674	1
47	T_CD8,PD1-,LAG3-,TIM3,KI67	T_CD8,PD1-,LAG3-,TIM3	3354	24200	0.128	0.0303	4.7	2.98	8.73	9.43e-08	6.25e-05
48	T_CD8,PD1-,LAG3,TIM3-,KI67	T_CD8,PD1-,LAG3,TIM3-	36	258	0.05	0	1	0.857	2.75	0.703	1
49	T_CD8,PD1-,LAG3-,TIM3-,KI67	T_CD8,PD1-,LAG3-,TIM3-	521	7908	0.0463	0	3.43	1.05	834	0.00188	1
50	T_CD8,KI67	T_CD8	11880	57596	0.188	0.0443	5.46	3.64	8.47	2.38e-11	1.58e-08
51	T_CD8,PD1	T_CD8	21354	57596	0.251	0.0898	4.05	2.36	8.51	1.08e-06	0.000713
52	T_CD8,LAG3	T_CD8	10781	57596	0.133	0.0605	2.58	1.22	7.46	0.0114	1
53	T_CD8,TIM3	T_CD8	45647	57596	0.876	0.786	1.46	0.654	3.19	0.319	1
54	T_CD8,CD27	T_CD8	36435	57596	0.527	0.2	5.35	3.11	10.2	4.78e-08	3.17e-05
55	T_CD8,ICOS	T_CD8	21415	57596	0.332	0.174	2.07	1.12	3.49	0.0132	1
56	T_CD8,CD25	T_CD8	948	57596	0.00329	0	1.21	1	32	0.163	1
57	T_CD8,PD1,LAG3,TIM3	T_CD8	6500	57596	0.071	0	625	8.88	1030	4.32e-08	2.86e-05
58	T_CD8,PD1,LAG3-,TIM3	T_CD8	11071	57596	0.147	0.0553	3.3	1.91	6.91	2.4e-05	0.0159
59	T_CD8,PD1,LAG3,TIM3-	T_CD8	147	57596	0	0	1	1	1	1	1
60	T_CD8,PD1-,LAG3,TIM3	T_CD8	3876	57596	0.0425	0.00944	3.79	1.59	11.7	0.00433	1
61	T_CD8,PD1,LAG3-,TIM3-	T_CD8	3636	57596	0.00614	0.00355	1	0.848	14.9	0.415	1
62	T_CD8,PD1-,LAG3-,TIM3	T_CD8	24200	57596	0.529	0.5	1.06	0.612	2.05	0.842	1
63	T_CD8,PD1-,LAG3,TIM3-	T_CD8	258	57596	0.000274	0	1	1	1.41	0.197	1
64	T_CD8,PD1-,LAG3-,TIM3-	T_CD8	7908	57596	0.1	0.19	0.634	0.336	1.22	0.134	1
65	T_CD8	Immune_All	57596	217350	0.259	0.0425	7.51	3.87	12.5	1.62e-09	1.08e-06
66	T_CD8	T_All	57596	114998	0.41	0.21	2.46	1.99	3.17	1.08e-07	7.16e-05
67	T_CD8	T_reg4	57596	10263	4.07	5.62
68	T_reg4,PD1,KI67	T_reg4,PD1	496	1771	0.295	0.0458	10.5	2.84	5090	3.77e-05	0.025
69	T_reg4,LAG3,KI67	T_reg4,LAG3	217	720	0.35	0	2990	1.62	12700	0.000374	0.248
70	T_reg4,TIM3,KI67	T_reg4,TIM3	1523	7485	0.262	0.0517	8.27	3.93	3690	2.48e-10	1.65e-07
71	T_reg4,CD27,KI67	T_reg4,CD27	1642	7568	0.266	0.0431	9.92	4.91	3180	1.03e-09	6.81e-07
72	T_reg4,ICOS,KI67	T_reg4,ICOS	1944	7324	0.296	0.0339	16.6	4.87	4770	8.27e-09	5.48e-06
73	T_reg4,CD25,KI67	T_reg4,CD25	982	3233	0.363	0.0741	8.28	3.42	3180	4.09e-07	0.000271
74	T_reg4,MHCII,KI67	T_reg4,MHCII	953	4472	0.249	0.0156	42.2	6.44	5660	1.08e-11	7.14e-09
75	T_reg4,PD1,LAG3,TIM3,KI67	T_reg4,PD1,LAG3,TIM3	41	168	0.4	0	4240	1	25500	0.00942	1
76	T_reg4,PD1,LAG3-,TIM3,KI67	T_reg4,PD1,LAG3-,TIM3	186	856	0.3	0.0179	10	1.72	5270	0.000772	0.512
77	T_reg4,PD1,LAG3,TIM3-,KI67	T_reg4,PD1,LAG3,TIM3-	6	18	0	0	1	1.54e-09	648000000	1	1
78	T_reg4,PD1-,LAG3,TIM3,KI67	T_reg4,PD1-,LAG3,TIM3	158	481	0.333	0	3920	1	12700	0.0126	1
79	T_reg4,PD1,LAG3-,TIM3-,KI67	T_reg4,PD1,LAG3-,TIM3-	263	729	0.371	0	23.6	1	18800	0.0354	1
80	T_reg4,PD1-,LAG3-,TIM3,KI67	T_reg4,PD1-,LAG3-,TIM3	1138	5980	0.25	0.0182	421	4.47	4590	6.59e-10	4.37e-07
81	T_reg4,PD1-,LAG3,TIM3-,KI67	T_reg4,PD1-,LAG3,TIM3-	12	53	0.167	0	4670	1	25500	0.018	1
82	T_reg4,PD1-,LAG3-,TIM3-,KI67	T_reg4,PD1-,LAG3-,TIM3-	311	1978	0.167	0.0135	4.45	1.6	15.4	0.00013	0.0859
83	T_reg4,KI67	T_reg4	2115	10263	0.241	0.0435	8.52	4.54	2610	2.36e-11	1.56e-08
84	T_reg4,PD1	T_reg4	1771	10263	0.0667	0.069	1.67	0.77	13.9	0.25	1
85	T_reg4,LAG3	T_reg4	720	10263	0.0422	0	22.4	3	404	6.6e-05	0.0438
86	T_reg4,TIM3	T_reg4	7485	10263	0.859	0.798	1.15	0.253	2.79	0.805	1
87	T_reg4,CD27	T_reg4	7568	10263	0.79	0.571	2.75	1.81	3.88	2.34e-05	0.0155
88	T_reg4,ICOS	T_reg4	7324	10263	0.82	0.688	2.06	1.18	3.23	0.0147	1
89	T_reg4,CD25	T_reg4	3233	10263	0.301	0.245	1.56	0.923	2.79	0.0949	1
90	T_reg4,MHCII	T_reg4	4472	10263	0.524	0.369	1.65	1.09	2.44	0.0189	1
91	T_reg4,PD1,LAG3,TIM3	T_reg4	168	10263	0.00682	0	3.12	1	164	0.000103	0.0684
92	T_reg4,PD1,LAG3-,TIM3	T_reg4	856	10263	0.0437	0.027	1.59	0.743	374	0.291	1
93	T_reg4,PD1,LAG3,TIM3-	T_reg4	18	10263	0	0	1	1	1	1	1
94	T_reg4,PD1-,LAG3,TIM3	T_reg4	481	10263	0.0176	0	14	1.75	293	9.44e-05	0.0626
95	T_reg4,PD1,LAG3-,TIM3-	T_reg4	729	10263	0	0	1	1	1	1	1
96	T_reg4,PD1-,LAG3-,TIM3	T_reg4	5980	10263	0.698	0.537	1.67	0.744	3.3	0.148	1
97	T_reg4,PD1-,LAG3,TIM3-	T_reg4	53	10263	0	0	1	1	1	1	1
98	T_reg4,PD1-,LAG3-,TIM3-	T_reg4	1978	10263	0.124	0.192	0.702	0.345	1.69	0.403	1
99	T_reg4	Immune_All	10263	217350	0.0588	0.0159	3.74	1.63	11	4.2e-05	0.0278
100	T_reg4	T_All	10263	114998	0.0916	0.0596	1.55	1.05	2.32	0.0284	1
101	T_reg8,PD1,KI67	T_reg8,PD1	49	126	0.5	0	8480	1	25500	0.0765	1
102	T_reg8,LAG3,KI67	T_reg8,LAG3	46	87	0.55	0	30500	5090	648000000	0.0147	1
103	T_reg8,TIM3,KI67	T_reg8,TIM3	155	521	0.25	0	7150	1	9790	0.00389	1
104	T_reg8,CD27,KI67	T_reg8,CD27	162	520	0.273	0	8480	5450	11900	0.000235	0.156
105	T_reg8,ICOS,KI67	T_reg8,ICOS	173	506	0.316	0	7270	1	12700	0.0381	1
106	T_reg8,CD25,KI67	T_reg8,CD25	65	151	0.333	0	12700	1	25500	0.0394	1
107	T_reg8,PD1,LAG3,TIM3,KI67	T_reg8,PD1,LAG3,TIM3	15	27	1	0
108	T_reg8,PD1,LAG3-,TIM3,KI67	T_reg8,PD1,LAG3-,TIM3	21	75	0.292	0	1	1	25400	0.127	1
109	T_reg8,PD1,LAG3,TIM3-,KI67	T_reg8,PD1,LAG3,TIM3-	0	1	0	0				1	1
110	T_reg8,PD1-,LAG3,TIM3,KI67	T_reg8,PD1-,LAG3,TIM3	30	57	0.5	0	25500	1	648000000	0.0728	1
111	T_reg8,PD1,LAG3-,TIM3-,KI67	T_reg8,PD1,LAG3-,TIM3-	13	23	0.5	0	25500	1	648000000	0.259	1
112	T_reg8,PD1-,LAG3-,TIM3,KI67	T_reg8,PD1-,LAG3-,TIM3	89	362	0.2	0	5450	1	8480	0.0729	1
113	T_reg8,PD1-,LAG3,TIM3-,KI67	T_reg8,PD1-,LAG3,TIM3-	1	2	0.5	0
114	T_reg8,PD1-,LAG3-,TIM3-,KI67	T_reg8,PD1-,LAG3-,TIM3-	33	158	0.148	0	4240	1	12700	0.00663	1
115	T_reg8,KI67	T_reg8	202	705	0.226	0	5300	1	7570	0.00148	0.98
116	T_reg8,PD1	T_reg8	126	705	0.122	0	4.44	1	2940	0.197	1
117	T_reg8,LAG3	T_reg8	87	705	0.0817	0	1520	1	3180	0.00271	1
118	T_reg8,TIM3	T_reg8	521	705	0.832	0.733	1	0.1	3.87	0.901	1
119	T_reg8,CD27	T_reg8	520	705	0.741	0.333	5.5	1.33	12700	0.0117	1
120	T_reg8,ICOS	T_reg8	506	705	0.768	0.361	4.96	1	46100	0.0414	1
121	T_reg8,CD25	T_reg8	151	705	0.15	0	6.65	1	4240	0.0293	1
122	T_reg8,PD1,LAG3,TIM3	T_reg8	27	705	0	0	1	1	542	1	1
123	T_reg8,PD1,LAG3-,TIM3	T_reg8	75	705	0.0541	0	1	0.5	1060	0.738	1
124	T_reg8,PD1,LAG3,TIM3-	T_reg8	1	705	0	0	1	1	1	1	1
125	T_reg8,PD1-,LAG3,TIM3	T_reg8	57	705	0.0294	0	1	1	2040	0.00602	1
126	T_reg8,PD1,LAG3-,TIM3-	T_reg8	23	705	0	0	1	1	1	1	1
127	T_reg8,PD1-,LAG3-,TIM3	T_reg8	362	705	0.54	0.225	3	1	12700	0.0835	1
128	T_reg8,PD1-,LAG3,TIM3-	T_reg8	2	705	0	0	1	1	1	1	1
129	T_reg8,PD1-,LAG3-,TIM3-	T_reg8	158	705	0.157	0.156	1	0.267	4	0.956	1
130	T_reg8	Immune_All	705	217350	0.00419	0	63.7	39.4	97.8	5.77e-16	3.82e-13
131	T_reg8	T_All	705	114998	0.00866	0	89.8	54.5	164	4.01e-15	2.66e-12
132	T_regDN,PD1,KI67	T_regDN,PD1	1	6	0	0	1	1	25500	1	1
133	T_regDN,LAG3,KI67	T_regDN,LAG3	3	5	0.75	0
134	T_regDN,TIM3,KI67	T_regDN,TIM3	33	106	0.333	0	8480	1	17000	0.058	1
135	T_regDN,CD27,KI67	T_regDN,CD27	30	100	0.31	0	10200	1	25400	0.0137	1
136	T_regDN,ICOS,KI67	T_regDN,ICOS	43	99	0.5	0.667	7.86e-05	3.93e-05	4	0.402	1
137	T_regDN,CD25,KI67	T_regDN,CD25	17	38	0.5	0	25500	1	648000000	0.149	1
138	T_regDN,KI67	T_regDN	50	171	0.222	0	1.41	1	10200	0.0526	1
139	T_regDN,PD1	T_regDN	6	171	0	0	1	1	1	1	1
140	T_regDN,LAG3	T_regDN	5	171	0	0	1	1	1	1	1
141	T_regDN,TIM3	T_regDN	106	171	0.75	1	1	0.000138	1.4	0.536	1
142	T_regDN,CD27	T_regDN	100	171	0.667	0.542	1	0.667	25500	0.616	1
143	T_regDN,ICOS	T_regDN	99	171	0.667	0	25500	4	50900	0.000306	0.203
144	T_regDN,CD25	T_regDN	38	171	0.167	0	1	1	5090	0.468	1
145	T_regDN	Immune_All	171	217350	0.000999	0	17.2	13.4	25.4	1.83e-10	1.22e-07
146	T_regDN	T_All	171	114998	0.00161	0	33	19.9	40.5	9.14e-10	6.06e-07
147	T_CD4/CD8,PD1,KI67	T_CD4/CD8,PD1	145	792	0.243	0	3770	2.57	8180	9.16e-05	0.0607
148	T_CD4/CD8,LAG3,KI67	T_CD4/CD8,LAG3	66	204	0.5	0	20400	7270	25500	6.58e-05	0.0436
149	T_CD4/CD8,TIM3,KI67	T_CD4/CD8,TIM3	234	1899	0.169	0	3340	653	5090	1.3e-07	8.62e-05
150	T_CD4/CD8,CD27,KI67	T_CD4/CD8,CD27	208	1573	0.18	0	3080	519	5870	1.52e-07	0.000101
151	T_CD4/CD8,ICOS,KI67	T_CD4/CD8,ICOS	153	1018	0.2	0	4240	1590	6360	1.26e-06	0.000837
152	T_CD4/CD8,CD25,KI67	T_CD4/CD8,CD25	4	61	0	0	1	1	1	1	1
153	T_CD4/CD8,KI67	T_CD4/CD8	269	2295	0.159	0	1960	4.44	3640	1.77e-06	0.00117
154	T_CD4/CD8,PD1	T_CD4/CD8	792	2295	0.285	0.167	2.25	1	27.9	0.032	1
155	T_CD4/CD8,LAG3	T_CD4/CD8	204	2295	0.0703	0	1	1	606	0.0587	1
156	T_CD4/CD8,TIM3	T_CD4/CD8	1899	2295	0.918	0.92	1	0.353	2.25	0.99	1
157	T_CD4/CD8,CD27	T_CD4/CD8	1573	2295	0.737	0.333	6.58	2.67	36.5	1.09e-05	0.00721
158	T_CD4/CD8,ICOS	T_CD4/CD8	1018	2295	0.455	0.367	1.65	0.833	11.4	0.159	1
159	T_CD4/CD8,CD25	T_CD4/CD8	61	2295	0	0	1	1	1	1	1
160	T_CD4/CD8	Immune_All	2295	217350	0.00965	0.00326	2.93	1.9	5.06	7.2e-06	0.00477
161	T_CD4/CD8	T_All	2295	114998	0.0167	0.0116	1.37	0.959	2.01	0.0813	1
162	T_null,PD1,KI67	T_null,PD1	88	286	0.317	0	7270	1	12700	0.000574	0.381
163	T_null,LAG3,KI67	T_null,LAG3	34	96	0.25	0	3	1	25500	0.057	1
164	T_null,TIM3,KI67	T_null,TIM3	197	1350	0.135	0	2260	13.3	3770	8.87e-07	0.000588
165	T_null,CD27,KI67	T_null,CD27	165	729	0.2	0	2830	2.8	6360	1.62e-05	0.0107
166	T_null,ICOS,KI67	T_null,ICOS	76	304	0.273	0	8480	4240	10600	2.6e-06	0.00173
167	T_null,CD25,KI67	T_null,CD25	4	156	0	0	1	1	1	1	1
168	T_null,KI67	T_null	265	2124	0.123	0	1820	707	3180	7.42e-08	4.92e-05
169	T_null,PD1	T_null	286	2124	0.0934	0	1450	6.59	2010	2.01e-05	0.0133
170	T_null,LAG3	T_null	96	2124	0.0465	0	943	439	1310	1.12e-07	7.42e-05
171	T_null,TIM3	T_null	1350	2124	0.696	0.7	0.918	0.278	2.21	0.809	1
172	T_null,CD27	T_null	729	2124	0.393	0.133	4.33	1.87	7950	1.35e-05	0.00898
173	T_null,ICOS	T_null	304	2124	0.139	0	10.3	1.5	2680	0.00362	1
174	T_null,CD25	T_null	156	2124	0	0	1	1	1	1	1
175	T_null	Immune_All	2124	217350	0.0112	0.00354	3.32	2.04	5.45	2.39e-08	1.58e-05
176	T_null	T_All	2124	114998	0.0184	0.0159	1.24	0.984	1.68	0.072	1
177	T_All,PD1,KI67	T_All,PD1	8667	33291	0.287	0.101	4.28	3.02	6.67	1.44e-10	9.56e-08
178	T_All,LAG3,KI67	T_All,LAG3	5347	13537	0.423	0.0945	9.77	5.37	26.7	6.08e-12	4.03e-09
179	T_All,TIM3,KI67	T_All,TIM3	15589	86959	0.2	0.0645	3.83	2.81	5.45	1.16e-10	7.72e-08
180	T_All,CD27,KI67	T_All,CD27	14435	64216	0.213	0.0707	4.04	2.69	6.73	1.57e-09	1.04e-06
181	T_All,ICOS,KI67	T_All,ICOS	11088	44379	0.268	0.0716	5.02	3.41	7.29	1.02e-10	6.74e-08
182	T_All,CD25,KI67	T_All,CD25	1421	5713	0.345	0.0909	4.75	2.77	8.44	7.22e-08	4.79e-05
183	T_All,KI67	T_All	18589	114998	0.177	0.0577	3.43	2.52	4.64	2.22e-10	1.47e-07
184	T_All,PD1	T_All	33291	114998	0.216	0.119	2.1	1.44	3.25	0.000258	0.171
185	T_All,LAG3	T_All	13537	114998	0.0981	0.0403	2.72	1.49	6.2	0.00172	1
186	T_All,TIM3	T_All	86959	114998	0.836	0.804	1.17	0.607	2.22	0.616	1
187	T_All,CD27	T_All	64216	114998	0.553	0.186	5.39	3.43	8.44	1.97e-10	1.31e-07
188	T_All,ICOS	T_All	44379	114998	0.422	0.476	0.788	0.604	1.1	0.154	1
189	T_All,CD25	T_All	5713	114998	0.0367	0.0444	0.805	0.463	1.54	0.51	1
190	T_All	Immune_All	114998	217350	0.628	0.206	4.67	2.42	8.72	4.47e-09	2.97e-06
191	B_All,PD1,KI67	B_All,PD1	19	181	0	0	1	0.0714	1210	1	1
192	B_All,LAG3,KI67	B_All,LAG3	3	43	0	0	1	1	648000000	1	1
193	B_All,TIM3,KI67	B_All,TIM3	117	2455	0.0244	0	16	1	592	0.000962	0.638
194	B_All,CD27,KI67	B_All,CD27	53	1758	0.0185	0.0364	1	0.222	1.04	0.471	1
195	B_All,ICOS,KI67	B_All,ICOS	13	186	0	0	1	1	1	1	1
196	B_All,CD25,KI67	B_All,CD25	18	226	0	0.04	0.000962	0.000157	1	0.19	1
197	B_All,PD1,LAG3,TIM3,KI67	B_All,PD1,LAG3,TIM3	1	1	1	0
198	B_All,PD1,LAG3-,TIM3,KI67	B_All,PD1,LAG3-,TIM3	3	28	0	0	1	1	1	1	1
199	B_All,PD1,LAG3,TIM3-,KI67	B_All,PD1,LAG3,TIM3-	0	1	0	0				1	1
200	B_All,PD1-,LAG3,TIM3,KI67	B_All,PD1-,LAG3,TIM3	2	19	0	0	1	1	648000000	1	1
201	B_All,PD1,LAG3-,TIM3-,KI67	B_All,PD1,LAG3-,TIM3-	15	151	0	0.227	1	1.87e-06	1210	0.548	1
202	B_All,PD1-,LAG3-,TIM3,KI67	B_All,PD1-,LAG3-,TIM3	111	2407	0.0229	0	6.71	1	596	0.00116	0.769
203	B_All,PD1-,LAG3,TIM3-,KI67	B_All,PD1-,LAG3,TIM3-	0	22	0	0				1	1
204	B_All,PD1-,LAG3-,TIM3-,KI67	B_All,PD1-,LAG3-,TIM3-	119	3809	0.0132	0	1	1	9.04	0.239	1
205	B_All,KI67	B_All	251	6438	0.0329	0	2.13	1	499	0.0736	1
206	B_All,PD1	B_All	181	6438	0	0	1	1	20.8	1	1
207	B_All,LAG3	B_All	43	6438	0	0	1	1	1	1	1
208	B_All,TIM3	B_All	2455	6438	0.62	0.431	2.09	1	4.69	0.0452	1
209	B_All,CD27	B_All	1758	6438	0.142	0	5.82	1.18	2330	0.00402	1
210	B_All,ICOS	B_All	186	6438	0.0336	0	749	626	995	1.93e-11	1.28e-08
211	B_All,CD25	B_All	226	6438	0	0	1	1	1	1	1
212	B_All,PD1,LAG3,TIM3	B_All	1	6438	0	0	1	1	1	1	1
213	B_All,PD1,LAG3-,TIM3	B_All	28	6438	0	0	1	1	1	1	1
214	B_All,PD1,LAG3,TIM3-	B_All	1	6438	0	0	1	1	1	1	1
215	B_All,PD1-,LAG3,TIM3	B_All	19	6438	0	0	1	1	1	1	1
216	B_All,PD1,LAG3-,TIM3-	B_All	151	6438	0	0	1	1	1	1	1
217	B_All,PD1-,LAG3-,TIM3	B_All	2407	6438	0.612	0.408	2.3	1.1	5.16	0.0197	1
218	B_All,PD1-,LAG3,TIM3-	B_All	22	6438	0	0	1	1	1	1	1
219	B_All,PD1-,LAG3-,TIM3-	B_All	3809	6438	0.38	0.538	0.516	0.25	1	0.0447	1
220	B	Immune_All	6438	217350	0.0192	0.00589	4.79	2.46	13.6	7.78e-06	0.00516
221	NK,PD1,KI67	NK,PD1	22	349	0	0	1	1	1180	1	1
222	NK,LAG3,KI67	NK,LAG3	15	459	0	0	1	1	1	1	1
223	NK,TIM3,KI67	NK,TIM3	992	12705	0.106	0.029	4.04	2.25	7.91	1.54e-05	0.0102
224	NK,CD27,KI67	NK,CD27	60	517	0.0357	0	1	1	1960	0.0474	1
225	NK,ICOS,KI67	NK,ICOS	27	164	0	0	1	1	1	1	1
226	NK,CD25,KI67	NK,CD25	130	2272	0	0	1	1	2.23	1	1
227	NK,KI67	NK	1200	17577	0.0753	0.0217	3.48	1.89	6.4	8.45e-05	0.056
228	NK,PD1	NK	349	17577	0.00101	0	1	1	63.9	0.00027	0.179
229	NK,LAG3	NK	459	17577	0	0.00885	0.447	0.00633	1	0.00167	1
230	NK,TIM3	NK	12705	17577	0.84	0.695	2.12	1.22	3.32	0.0105	1
231	NK,CD27	NK	517	17577	0.0434	0	145	7.37	265	1.21e-06	0.000803
232	NK,ICOS	NK	164	17577	0.0221	0	314	63.9	512	4.7e-10	3.11e-07
233	NK,CD25	NK	2272	17577	0	0	1	1	1	1	1
234	NK	Immune_All	17577	217350	0.0602	0.073	0.813	0.523	1.3	0.381	1
235	NK	NK_All	17577	20397	0.796	0.939	0.33	0.185	0.598	0.000388	0.257
236	NKT,PD1,KI67	NKT,PD1	9	38	0	0.25	1	3.93e-05	25500	0.701	1
237	NKT,LAG3,KI67	NKT,LAG3	3	19	0	0	1	1	76300	1	1
238	NKT,TIM3,KI67	NKT,TIM3	51	468	0.1	0	1	1	3050	0.0424	1
239	NKT,CD27,KI67	NKT,CD27	15	148	0	0	1	1	4240	1	1
240	NKT,ICOS,KI67	NKT,ICOS	19	87	0.0625	0	1	1	12700	0.175	1
241	NKT,CD25,KI67	NKT,CD25	6	49	0	0	1	0.000236	153000	1	1
242	NKT,KI67	NKT	62	569	0.0968	0	1.75	1	2730	0.0272	1
243	NKT,PD1	NKT	38	569	0	0	1	1	592	1	1
244	NKT,LAG3	NKT	19	569	0	0	1	1	1	1	1
245	NKT,TIM3	NKT	468	569	0.917	1	1	0.583	1.13	0.885	1
246	NKT,CD27	NKT	148	569	0.281	0	5660	2.67	11900	2.7e-05	0.0179
247	NKT,ICOS	NKT	87	569	0.125	0	2420	1	5530	2.88e-05	0.0191
248	NKT,CD25	NKT	49	569	0	0	1	1	1	1	1
249	NKT	Immune_All	569	217350	0.00171	0	2.96	1.17	10.9	0.00158	1
250	NKT	NK_All	569	20397	0.0195	0	5.17	1.21	153	0.00142	0.944
251	NKT_CD4,PD1,KI67	NKT_CD4,PD1	41	257	0.152	0	7.85	1	10200	0.0159	1
252	NKT_CD4,LAG3,KI67	NKT_CD4,LAG3	6	60	0	0	1	1	648000000	1	1
253	NKT_CD4,TIM3,KI67	NKT_CD4,TIM3	81	1049	0.0227	0	1	1	2.67	0.266	1
254	NKT_CD4,CD27,KI67	NKT_CD4,CD27	28	288	0	0	1	1	1	1	1
255	NKT_CD4,ICOS,KI67	NKT_CD4,ICOS	41	409	0.143	0	1	1	4240	0.0487	1
256	NKT_CD4,CD25,KI67	NKT_CD4,CD25	11	167	0	0	1	1	8480	1	1
257	NKT_CD4,KI67	NKT_CD4	91	1205	0.0167	0	1	1	2	0.334	1
258	NKT_CD4,PD1	NKT_CD4	257	1205	0.0955	0	1	1	16.9	0.0511	1
259	NKT_CD4,LAG3	NKT_CD4	60	1205	0	0	1	1	1	1	1
260	NKT_CD4,TIM3	NKT_CD4	1049	1205	1	1	1	1	1	0.0372	1
261	NKT_CD4,CD27	NKT_CD4	288	1205	0.333	0	6030	6	9260	1.9e-07	0.000126
262	NKT_CD4,ICOS	NKT_CD4	409	1205	0.279	0.315	1	0.25	2.08	0.705	1
263	NKT_CD4,CD25	NKT_CD4	167	1205	0	0	1	1	1	1	1
264	NKT_CD4	Immune_All	1205	217350	0.00289	0.00173	1.51	0.865	2.84	0.155	1
265	NKT_CD4	NK_All	1205	20397	0.0342	0.0286	1.41	0.75	3	0.3	1
266	NKT_CD8,PD1,KI67	NKT_CD8,PD1	120	379	0.291	0	8100	1	12700	0.0496	1
267	NKT_CD8,LAG3,KI67	NKT_CD8,LAG3	81	175	0.5	0	17000	1	25500	0.0334	1
268	NKT_CD8,TIM3,KI67	NKT_CD8,TIM3	206	935	0.213	0	3.95	1	4240	0.049	1
269	NKT_CD8,CD27,KI67	NKT_CD8,CD27	175	606	0.261	0	6360	1	12700	0.0146	1
270	NKT_CD8,ICOS,KI67	NKT_CD8,ICOS	89	322	0.333	0	6360	1	12700	0.12	1
271	NKT_CD8,CD25,KI67	NKT_CD8,CD25	4	49	0	0.0263	1	1.54e-09	2830	0.469	1
272	NKT_CD8,KI67	NKT_CD8	219	1046	0.21	0	4.87	1	4240	0.0516	1
273	NKT_CD8,PD1	NKT_CD8	379	1046	0.3	0	2550	1.74	10900	5.11e-05	0.0339
274	NKT_CD8,LAG3	NKT_CD8	175	1046	0.0833	0	1	1	1210	0.383	1
275	NKT_CD8,TIM3	NKT_CD8	935	1046	1	1	1	1	1	0.138	1
276	NKT_CD8,CD27	NKT_CD8	606	1046	0.5	0	8480	3.45	18500	2.04e-05	0.0135
277	NKT_CD8,ICOS	NKT_CD8	322	1046	0.25	0	795	1	5090	0.00361	1
278	NKT_CD8,CD25	NKT_CD8	49	1046	0	0	1	1	1	1	1
279	NKT_CD8	Immune_All	1046	217350	0.00436	0.001	7.14	3.59	24.2	4.52e-09	3e-06
280	NKT_CD8	NK_All	1046	20397	0.0808	0.00962	15.5	5.67	60	3.03e-08	2.01e-05
281	NK_All,PD1,KI67	NK_All,PD1	192	1023	0.182	0	4240	1.33	5660	0.000337	0.223
282	NK_All,LAG3,KI67	NK_All,LAG3	105	713	0.375	0	12700	23.1	25400	8.54e-08	5.66e-05
283	NK_All,TIM3,KI67	NK_All,TIM3	1330	15157	0.147	0.0345	4.14	2.32	7.69	9.83e-06	0.00652
284	NK_All,CD27,KI67	NK_All,CD27	278	1559	0.222	0	1780	3.33	4240	5.36e-06	0.00355
285	NK_All,ICOS,KI67	NK_All,ICOS	176	982	0.257	0	2830	2	6020	0.000401	0.266
286	NK_All,CD25,KI67	NK_All,CD25	151	2537	0	0	1	1	1	1	1
287	NK_All,PD1,LAG3,TIM3,KI67	NK_All,PD1,LAG3,TIM3	57	129	0.5	0	12700	1	76400	0.0461	1
288	NK_All,PD1,LAG3-,TIM3,KI67	NK_All,PD1,LAG3-,TIM3	111	534	0.167	0	4240	1	5090	0.00013	0.086
289	NK_All,PD1,LAG3,TIM3-,KI67	NK_All,PD1,LAG3,TIM3-	1	2	0.5	0
290	NK_All,PD1-,LAG3,TIM3,KI67	NK_All,PD1-,LAG3,TIM3	41	433	0	0	1	1	8	1	1
291	NK_All,PD1,LAG3-,TIM3-,KI67	NK_All,PD1,LAG3-,TIM3-	23	358	0.0192	0	30.8	1	1700	0.0357	1
292	NK_All,PD1-,LAG3-,TIM3,KI67	NK_All,PD1-,LAG3-,TIM3	1121	14061	0.0995	0.0339	3.47	1.89	6.58	8.17e-05	0.0541
293	NK_All,PD1-,LAG3,TIM3-,KI67	NK_All,PD1-,LAG3,TIM3-	6	149	0.5	0	28.5	1	648000000	0.126	1
294	NK_All,PD1-,LAG3-,TIM3-,KI67	NK_All,PD1-,LAG3-,TIM3-	212	4731	0.0556	0	4.55	1.3	943	7.08e-05	0.0469
295	NK_All,KI67	NK_All	1572	20397	0.105	0.0316	3.58	2.02	6.66	1.85e-05	0.0122
296	NK_All,PD1	NK_All	1023	20397	0.0515	0	214	17.1	382	4.17e-09	2.76e-06
297	NK_All,LAG3	NK_All	713	20397	0.0146	0.00962	1	0.669	2.79	0.587	1
298	NK_All,TIM3	NK_All	15157	20397	0.867	0.714	2.22	1.19	3.67	0.0164	1
299	NK_All,CD27	NK_All	1559	20397	0.134	0.00437	36.8	8.46	530	1.87e-08	1.24e-05
300	NK_All,ICOS	NK_All	982	20397	0.0663	0.012	7.15	3.29	467	1.15e-08	7.65e-06
301	NK_All,CD25	NK_All	2537	20397	0	0.00441	1	0.0861	1	0.0783	1
302	NK_All,PD1,LAG3,TIM3	NK_All	129	20397	0.00594	0	57.5	1	179	3.01e-07	0.0002
303	NK_All,PD1,LAG3-,TIM3	NK_All	534	20397	0.031	0	123	9.54	404	1.1e-08	7.29e-06
304	NK_All,PD1,LAG3,TIM3-	NK_All	2	20397	0	0	1	1	1	1	1
305	NK_All,PD1-,LAG3,TIM3	NK_All	433	20397	0.00293	0.00526	1	0.497	1	0.475	1
306	NK_All,PD1,LAG3-,TIM3-	NK_All	358	20397	0	0	1	1	1	1	1
307	NK_All,PD1-,LAG3-,TIM3	NK_All	14061	20397	0.797	0.665	1.71	1.11	2.53	0.0246	1
308	NK_All,PD1-,LAG3,TIM3-	NK_All	149	20397	0	0	1	1	1	1	1
309	NK_All,PD1-,LAG3-,TIM3-	NK_All	4731	20397	0.133	0.256	0.49	0.301	0.847	0.0145	1
310	NK_All	Immune_All	20397	217350	0.0718	0.0788	0.934	0.631	1.42	0.724	1
311	Macrophage_MHCII+,TIM3,KI67	Macrophage_MHCII+,TIM3	1510	23913	0.0376	0.0625	0.693	0.465	1.04	0.0898	1
312	Macrophage_MHCII+,CD25,KI67	Macrophage_MHCII+,CD25	63	762	0	0	1	1	1	1	1
313	Macrophage_MHCII+,PDL1,KI67	Macrophage_MHCII+,PDL1	106	1967	0.0302	0	753	1	2120	0.00485	1
314	Macrophage_MHCII+,B7H3,KI67	Macrophage_MHCII+,B7H3	1215	18851	0.0401	0.0791	0.639	0.44	1.02	0.0605	1
315	Macrophage_MHCII+,IDO1,KI67	Macrophage_MHCII+,IDO1	24	301	0	0	1	1	1	1	1
316	Macrophage_MHCII+,PDL1,B7H3,IDO1,KI67	Macrophage_MHCII+,PDL1,B7H3,IDO1	1	39	0	0				1	1
317	Macrophage_MHCII+,PDL1,B7H3,IDO1-,KI67	Macrophage_MHCII+,PDL1,B7H3,IDO1-	105	1894	0.0297	0	749	1	1450	0.0187	1
318	Macrophage_MHCII+,PDL1,B7H3-,IDO1,KI67	Macrophage_MHCII+,PDL1,B7H3-,IDO1	0	1	0	0				1	1
319	Macrophage_MHCII+,PDL1-,B7H3,IDO1,KI67	Macrophage_MHCII+,PDL1-,B7H3,IDO1	17	196	0	0	1	1	1	1	1
320	Macrophage_MHCII+,PDL1,B7H3-,IDO1-,KI67	Macrophage_MHCII+,PDL1,B7H3-,IDO1-	0	33	0	0				1	1
321	Macrophage_MHCII+,PDL1-,B7H3,IDO1-,KI67	Macrophage_MHCII+,PDL1-,B7H3,IDO1-	1092	16722	0.0401	0.0791	0.633	0.429	1.01	0.0572	1
322	Macrophage_MHCII+,PDL1-,B7H3-,IDO1,KI67	Macrophage_MHCII+,PDL1-,B7H3-,IDO1	6	65	0	0	1	1	1	1	1
323	Macrophage_MHCII+,PDL1-,B7H3-,IDO1-,KI67	Macrophage_MHCII+,PDL1-,B7H3-,IDO1-	353	7001	0	0.0171	1	0.122	1	0.0478	1
324	Macrophage_MHCII+,KI67	Macrophage_MHCII+	1574	25951	0.0397	0.062	0.799	0.568	1.24	0.277	1
325	Macrophage_MHCII+,TIM3	Macrophage_MHCII+	23913	25951	0.972	0.963	1.41	0.634	3.69	0.374	1
326	Macrophage_MHCII+,CD25	Macrophage_MHCII+	762	25951	0.00246	0.00157	1	0.203	1	0.189	1
327	Macrophage_MHCII+,PDL1	Macrophage_MHCII+	1967	25951	0.0793	0	591	321	4220	1.55e-13	1.03e-10
328	Macrophage_MHCII+,B7H3	Macrophage_MHCII+	18851	25951	0.966	0.745	11.5	5.06	29.7	9.98e-08	6.62e-05
329	Macrophage_MHCII+,IDO1	Macrophage_MHCII+	301	25951	0.00592	0	7.68	1.15	83.4	0.000418	0.277
330	Macrophage_MHCII+,MRC1	Macrophage_MHCII+	8277	25951	0.368	0.323	1	0.606	1.61	0.993	1
331	Macrophage_MHCII+,TGM2	Macrophage_MHCII+	347	25951	0	0.0126	0.224	0.0319	0.651	4.62e-05	0.0306
332	Macrophage_MHCII+,PDL1,B7H3,IDO1	Macrophage_MHCII+	39	25951	0	0	1	1	55.7	1	1
333	Macrophage_MHCII+,PDL1,B7H3,IDO1-	Macrophage_MHCII+	1894	25951	0.0768	0	801	318	4130	2.34e-14	1.55e-11
334	Macrophage_MHCII+,PDL1,B7H3-,IDO1	Macrophage_MHCII+	1	25951	0	0	1	1	1	1	1
335	Macrophage_MHCII+,PDL1-,B7H3,IDO1	Macrophage_MHCII+	196	25951	0.00209	0	1	1	49.7	0.00207	1
336	Macrophage_MHCII+,PDL1,B7H3-,IDO1-	Macrophage_MHCII+	33	25951	0	0	1	1	1	1	1
337	Macrophage_MHCII+,PDL1-,B7H3,IDO1-	Macrophage_MHCII+	16722	25951	0.766	0.739	1.56	0.779	3.08	0.213	1
338	Macrophage_MHCII+,PDL1-,B7H3-,IDO1	Macrophage_MHCII+	65	25951	0	0	1	1	1	1	1
339	Macrophage_MHCII+,PDL1-,B7H3-,IDO1-	Macrophage_MHCII+	7001	25951	0.0329	0.24	0.0818	0.0313	0.183	4.31e-08	2.86e-05
340	Macrophage_MHCII+	Immune_All	25951	217350	0.0993	0.149	0.531	0.342	0.886	0.0138	1
341	Macrophage_MHCII+	Macrophage_All	25951	59004	0.561	0.358	2.19	1.49	3.4	0.000285	0.189
342	Macrophage_MHCII+	Macrophage_MHCII-	25951	15588	3.26	1.63	0.733	0.26	2.69	0.723	1
343	Macrophage_MHCII+	T_All	25951	114998	0.151	0.612	1.01	0.627	1.6	0.965	1
344	Macrophage_MHCII-,TIM3,KI67	Macrophage_MHCII-,TIM3	723	9228	0.0594	0.0541	1.11	0.776	1.78	0.513	1
345	Macrophage_MHCII-,CD25,KI67	Macrophage_MHCII-,CD25	53	1113	0	0.0211	1	0.00126	1	0.178	1
346	Macrophage_MHCII-,PDL1,KI67	Macrophage_MHCII-,PDL1	36	729	0	0	1	1	1	1	1
347	Macrophage_MHCII-,B7H3,KI67	Macrophage_MHCII-,B7H3	1056	10235	0.0644	0.0889	0.716	0.485	1.05	0.118	1
348	Macrophage_MHCII-,IDO1,KI67	Macrophage_MHCII-,IDO1	8	248	0	0	1	1	1	1	1
349	Macrophage_MHCII-,PDL1,B7H3,IDO1,KI67	Macrophage_MHCII-,PDL1,B7H3,IDO1	1	13	0	0	1	1	8480	1	1
350	Macrophage_MHCII-,PDL1,B7H3,IDO1-,KI67	Macrophage_MHCII-,PDL1,B7H3,IDO1-	33	592	0	0	1	1	1	1	1
351	Macrophage_MHCII-,PDL1,B7H3-,IDO1,KI67	Macrophage_MHCII-,PDL1,B7H3-,IDO1	0	5	0	0				1	1
352	Macrophage_MHCII-,PDL1-,B7H3,IDO1,KI67	Macrophage_MHCII-,PDL1-,B7H3,IDO1	6	169	0	0	1	1	1	1	1
353	Macrophage_MHCII-,PDL1,B7H3-,IDO1-,KI67	Macrophage_MHCII-,PDL1,B7H3-,IDO1-	2	119	0	0	1	1	1	1	1
354	Macrophage_MHCII-,PDL1-,B7H3,IDO1-,KI67	Macrophage_MHCII-,PDL1-,B7H3,IDO1-	1016	9461	0.0615	0.0909	0.723	0.5	1.06	0.12	1
355	Macrophage_MHCII-,PDL1-,B7H3-,IDO1,KI67	Macrophage_MHCII-,PDL1-,B7H3-,IDO1	1	61	0	0	1	1	1	1	1
356	Macrophage_MHCII-,PDL1-,B7H3-,IDO1-,KI67	Macrophage_MHCII-,PDL1-,B7H3-,IDO1-	320	5168	0.0128	0.0323	1	0.403	1	0.312	1
357	Macrophage_MHCII-,KI67	Macrophage_MHCII-	1379	15588	0.0574	0.0637	0.911	0.62	1.33	0.58	1
358	Macrophage_MHCII-,TIM3	Macrophage_MHCII-	9228	15588	0.852	0.811	1.5	0.806	3.02	0.195	1
359	Macrophage_MHCII-,CD25	Macrophage_MHCII-	1113	15588	0	0	1	0.156	1	1	1
360	Macrophage_MHCII-,PDL1	Macrophage_MHCII-	729	15588	0.0258	0	377	12	665	6.37e-09	4.22e-06
361	Macrophage_MHCII-,B7H3	Macrophage_MHCII-	10235	15588	0.913	0.655	5.72	2.92	12.4	1.78e-05	0.0118
362	Macrophage_MHCII-,IDO1	Macrophage_MHCII-	248	15588	0	0	1	1	1.05	1	1
363	Macrophage_MHCII-,MRC1	Macrophage_MHCII-	4047	15588	0.38	0.222	1.81	0.873	3.66	0.116	1
364	Macrophage_MHCII-,TGM2	Macrophage_MHCII-	941	15588	0	0.025	0.15	0.00371	0.576	2.22e-05	0.0147
365	Macrophage_MHCII-,PDL1,B7H3,IDO1	Macrophage_MHCII-	13	15588	0	0	1	1	1	1	1
366	Macrophage_MHCII-,PDL1,B7H3,IDO1-	Macrophage_MHCII-	592	15588	0.0196	0	344	87.5	606	4.46e-10	2.96e-07
367	Macrophage_MHCII-,PDL1,B7H3-,IDO1	Macrophage_MHCII-	5	15588	0	0	1	1	1	1	1
368	Macrophage_MHCII-,PDL1-,B7H3,IDO1	Macrophage_MHCII-	169	15588	0	0	1	1	1	1	1
369	Macrophage_MHCII-,PDL1,B7H3-,IDO1-	Macrophage_MHCII-	119	15588	0	0	1	1	1	1	1
370	Macrophage_MHCII-,PDL1-,B7H3,IDO1-	Macrophage_MHCII-	9461	15588	0.797	0.53	3.17	1.73	5.31	0.000487	0.323
371	Macrophage_MHCII-,PDL1-,B7H3-,IDO1	Macrophage_MHCII-	61	15588	0	0	1	1	1	1	1
372	Macrophage_MHCII-,PDL1-,B7H3-,IDO1-	Macrophage_MHCII-	5168	15588	0.0868	0.334	0.177	0.0823	0.349	3.34e-05	0.0221
373	Macrophage_MHCII-	Immune_All	15588	217350	0.0289	0.121	0.252	0.175	0.372	3.12e-07	0.000207
374	Macrophage_MHCII-	Macrophage_All	15588	59004	0.168	0.244	0.635	0.445	0.914	0.0153	1
375	Macrophage_MHCII-	T_All	15588	114998	0.0478	0.676	0.245	0.121	0.518	0.000261	0.173
376	Macrophage_Other,TIM3,KI67	Macrophage_Other,TIM3	1054	12705	0.0585	0.0732	0.852	0.603	1.24	0.41	1
377	Macrophage_Other,CD25,KI67	Macrophage_Other,KI67	28	1280	0	0	1	1	1	1	1
378	Macrophage_Other,PDL1,KI67	Macrophage_Other,PDL1	36	608	0	0	1	1	1390	1	1
379	Macrophage_Other,B7H3,KI67	Macrophage_Other,B7H3	1083	12673	0.0621	0.0795	0.786	0.582	1.04	0.1	1
380	Macrophage_Other,IDO1,KI67	Macrophage_Other,IDO1	27	441	0	0	1	1	1	1	1
381	Macrophage_Other,PDL1,B7H3,IDO1,KI67	Macrophage_Other,PDL1,B7H3,IDO1	3	39	0	0	1	1	1	1	1
382	Macrophage_Other,PDL1,B7H3,IDO1-,KI67	Macrophage_Other,PDL1,B7H3,IDO1-	33	543	0	0	1	1	1500	1	1
383	Macrophage_Other,PDL1,B7H3-,IDO1,KI67	Macrophage_Other,PDL1,B7H3-,IDO1	0	2	0	0				1	1
384	Macrophage_Other,PDL1-,B7H3,IDO1,KI67	Macrophage_Other,PDL1-,B7H3,IDO1	20	257	0	0	1	1	1	1	1
385	Macrophage_Other,PDL1,B7H3-,IDO1-,KI67	Macrophage_Other,PDL1,B7H3-,IDO1-	0	24	0	0				1	1
386	Macrophage_Other,PDL1-,B7H3,IDO1-,KI67	Macrophage_Other,PDL1-,B7H3,IDO1-	1027	11834	0.0676	0.0788	0.834	0.617	1.11	0.221	1
387	Macrophage_Other,PDL1-,B7H3-,IDO1,KI67	Macrophage_Other,PDL1-,B7H3-,IDO1	4	143	0	0	1	1	6360	1	1
388	Macrophage_Other,PDL1-,B7H3-,IDO1-,KI67	Macrophage_Other,PDL1-,B7H3-,IDO1-	193	4623	0	0.0248	1	0.526	1	0.678	1
389	Macrophage_Other,KI67	Macrophage_Other	1280	17465	0.056	0.0637	1	0.714	1.35	0.985	1
390	Macrophage_Other,TIM3	Macrophage_Other	12705	17465	0.918	0.771	2.29	1.35	4.02	0.0066	1
391	Macrophage_Other,CD25	Macrophage_Other	796	17465	0.00326	0	1	0.571	1	0.544	1
392	Macrophage_Other,PDL1	Macrophage_Other	608	17465	0.0329	0	444	56.3	966	2.76e-11	1.83e-08
393	Macrophage_Other,B7H3	Macrophage_Other	12673	17465	0.924	0.656	8.22	4.12	16.2	5.62e-08	3.73e-05
394	Macrophage_Other,IDO1	Macrophage_Other	441	17465	0.0227	0	13.3	1.79	353	6.33e-05	0.0419
395	Macrophage_Other,MRC1	Macrophage_Other	2097	17465	0.0818	0.0996	0.993	0.602	1.53	0.909	1
396	Macrophage_Other,TGM2	Macrophage_Other	716	17465	0.00613	0.0306	0.252	0.0907	0.514	2.06e-05	0.0137
397	Macrophage_Other,PDL1,B7H3,IDO1	Macrophage_Other	39	17465	0	0	1	1	1	1	1
398	Macrophage_Other,PDL1,B7H3,IDO1-	Macrophage_Other	543	17465	0.0213	0	377	242	1120	2.33e-12	1.54e-09
399	Macrophage_Other,PDL1,B7H3-,IDO1	Macrophage_Other	2	17465	0	0	1	1	1	1	1
400	Macrophage_Other,PDL1-,B7H3,IDO1	Macrophage_Other	257	17465	0.014	0	146	2.69	374	7.78e-07	0.000516
401	Macrophage_Other,PDL1,B7H3-,IDO1-	Macrophage_Other	24	17465	0	0	1	1	1	1	1
402	Macrophage_Other,PDL1-,B7H3,IDO1-	Macrophage_Other	11834	17465	0.83	0.656	2.49	1.41	4.2	0.00176	1
403	Macrophage_Other,PDL1-,B7H3-,IDO1	Macrophage_Other	143	17465	0	0	1	1	1	1	1
404	Macrophage_Other,PDL1-,B7H3-,IDO1-	Macrophage_Other	4623	17465	0.0759	0.328	0.124	0.0647	0.248	6.55e-08	4.34e-05
405	Macrophage_Other	Immune_All	17465	217350	0.0471	0.0977	0.346	0.235	0.514	1.2e-07	7.93e-05
406	Macrophage_Other	Macrophage_All	17465	59004	0.249	0.366	0.662	0.457	0.984	0.0392	1
407	Macrophage_All,TIM3,KI67	Macrophage_All,TIM3	3287	45846	0.0529	0.0667	0.837	0.614	1.13	0.267	1
408	Macrophage_All,CD25,KI67	Macrophage_All,CD25	144	2671	0	0.0147	1	0.00291	1	0.357	1
409	Macrophage_All,PDL1,KI67	Macrophage_All,PDL1	178	3304	0.0362	0	779	1.7	1230	7.95e-05	0.0527
410	Macrophage_All,B7H3,KI67	Macrophage_All,B7H3	3354	41759	0.0578	0.0893	0.621	0.461	0.853	0.00427	1
411	Macrophage_All,IDO1,KI67	Macrophage_All,IDO1	59	990	0	0	1	1	1	1	1
412	Macrophage_All,MHCII,KI67	Macrophage_All,MHCII	2208	33288	0.0461	0.0702	0.736	0.542	1.03	0.0727	1
413	Macrophage_All,PDL1,B7H3,IDO1,KI67	Macrophage_All,PDL1,B7H3,IDO1	5	91	0	0	1	1	1	1	1
414	Macrophage_All,PDL1,B7H3,IDO1-,KI67	Macrophage_All,PDL1,B7H3,IDO1-	171	3029	0.0333	0	749	1	1190	0.01	1
415	Macrophage_All,PDL1,B7H3-,IDO1,KI67	Macrophage_All,PDL1,B7H3-,IDO1	0	8	0	0				1	1
416	Macrophage_All,PDL1-,B7H3,IDO1,KI67	Macrophage_All,PDL1-,B7H3,IDO1	43	622	0	0.0106	1	0.00181	1	0.214	1
417	Macrophage_All,PDL1,B7H3-,IDO1-,KI67	Macrophage_All,PDL1,B7H3-,IDO1-	2	176	0	0	1	1	1	1	1
418	Macrophage_All,PDL1-,B7H3,IDO1-,KI67	Macrophage_All,PDL1-,B7H3,IDO1-	3135	38017	0.0546	0.0888	0.623	0.471	0.859	0.00596	1
419	Macrophage_All,PDL1-,B7H3-,IDO1,KI67	Macrophage_All,PDL1-,B7H3-,IDO1	11	269	0	0	1	1	2210	1	1
420	Macrophage_All,PDL1-,B7H3-,IDO1-,KI67	Macrophage_All,PDL1-,B7H3-,IDO1-	866	16792	0.0313	0.0392	0.879	0.474	1.1	0.302	1
421	Macrophage_All,KI67	Macrophage_All	4233	59004	0.054	0.0713	0.799	0.602	1.09	0.156	1
422	Macrophage_All,TIM3	Macrophage_All	45846	59004	0.939	0.861	2.16	1.23	3.83	0.00801	1
423	Macrophage_All,CD25	Macrophage_All	2671	59004	0.00273	0.00531	0.695	0.0897	1	0.137	1
424	Macrophage_All,PDL1	Macrophage_All	3304	59004	0.0523	0	341	86.9	566	1.76e-11	1.16e-08
425	Macrophage_All,B7H3	Macrophage_All	41759	59004	0.943	0.681	9.5	4.89	19.5	4.42e-08	2.93e-05
426	Macrophage_All,IDO1	Macrophage_All	990	59004	0.00894	0.00229	5.37	2.07	22.5	0.000149	0.099
427	Macrophage_All,MHCII	Macrophage_All	33288	59004	0.704	0.518	2.2	1.55	3.37	0.000134	0.0887
428	Macrophage_All,MRC1	Macrophage_All	14421	59004	0.283	0.188	1.44	0.944	2.09	0.0928	1
429	Macrophage_All,TGM2	Macrophage_All	2004	59004	0.00531	0.0308	0.136	0.0573	0.242	8.88e-10	5.89e-07
430	Macrophage_All,PDL1,B7H3,IDO1	Macrophage_All	91	59004	0.00136	0	30.7	1	47	2.28e-09	1.51e-06
431	Macrophage_All,PDL1,B7H3,IDO1-	Macrophage_All	3029	59004	0.05	0	369	167	1140	3.6e-13	2.39e-10
432	Macrophage_All,PDL1,B7H3-,IDO1	Macrophage_All	8	59004	0	0	1	1	1	1	1
433	Macrophage_All,PDL1-,B7H3,IDO1	Macrophage_All	622	59004	0.00522	0	37.3	3.22	78.1	3.2e-05	0.0212
434	Macrophage_All,PDL1,B7H3-,IDO1-	Macrophage_All	176	59004	0.000986	0	1	1	26.7	0.00225	1
435	Macrophage_All,PDL1-,B7H3,IDO1-	Macrophage_All	38017	59004	0.782	0.672	2.28	1.32	3.96	0.00423	1
436	Macrophage_All,PDL1-,B7H3-,IDO1	Macrophage_All	269	59004	0	0	1	1	1	1	1
437	Macrophage_All,PDL1-,B7H3-,IDO1-	Macrophage_All	16792	59004	0.0569	0.306	0.103	0.0519	0.203	5.44e-08	3.61e-05
438	Macrophage_All	Immune_All	59004	217350	0.184	0.508	0.233	0.16	0.36	2.46e-09	1.63e-06
439	Macrophage_All	T_All	59004	114998	0.299	2.39	0.596	0.418	0.927	0.0176	1
440	Leukocyte_Other,PD1,KI67	Leukocyte_Other,PD1	156	571	0.302	1	2.95e-05	9.07e-06	1.57	0.0874	1
441	Leukocyte_Other,LAG3,KI67	Leukocyte_Other,LAG3	74	385	0.444	0.153	6.34	2.4	25500	0.00168	1
442	Leukocyte_Other,TIM3,KI67	Leukocyte_Other,TIM3	1467	12283	0.113	0.111	1.03	0.752	1.43	0.787	1
443	Leukocyte_Other,CD27,KI67	Leukocyte_Other,CD27	306	1941	0.174	0.174	1.15	0.667	2.01	0.543	1
444	Leukocyte_Other,ICOS,KI67	Leukocyte_Other,ICOS	273	1043	0.282	0.5	0.476	0.167	1.06	0.073	1
445	Leukocyte_Other,CD25,KI67	Leukocyte_Other,CD25	23	289	0.5	0.116	13.3	0.758	212000	0.108	1
446	Leukocyte_Other,PDL1,KI67	Leukocyte_Other,PDL1	90	943	0.109	0
447	Leukocyte_Other,B7H3,KI67	Leukocyte_Other,B7H3	1399	12149	0.101	0.111	0.85	0.621	1.15	0.281	1
448	Leukocyte_Other,IDO1,KI67	Leukocyte_Other,IDO1	22	371	0.125	0.25	0.444	0.167	76300	0.35	1
449	Leukocyte_Other,KI67	Leukocyte_Other	1780	16513	0.104	0.0929	1.14	0.85	1.51	0.338	1
450	Leukocyte_Other,PD1	Leukocyte_Other	571	16513	0.0423	0.0312	1.3	0.764	2.27	0.277	1
451	Leukocyte_Other,LAG3	Leukocyte_Other	385	16513	0.0113	0.0233	0.425	0.223	0.761	0.00543	1
452	Leukocyte_Other,TIM3	Leukocyte_Other	12283	16513	0.811	0.74	1.14	0.657	1.75	0.587	1
453	Leukocyte_Other,CD27	Leukocyte_Other	1941	16513	0.0793	0.0682	1.02	0.562	1.95	0.952	1
454	Leukocyte_Other,ICOS	Leukocyte_Other	1043	16513	0.0806	0.0234	2.91	1.71	4.26	2.35e-05	0.0156
455	Leukocyte_Other,CD25	Leukocyte_Other	289	16513	0.0061	0.0396	0.178	0.0653	0.469	0.000215	0.142
456	Leukocyte_Other,PDL1	Leukocyte_Other	943	16513	0.0784	0.0108	8.81	0.652	42.3	0.092	1
457	Leukocyte_Other,B7H3	Leukocyte_Other	12149	16513	0.879	0.622	5.77	2.75	10.8	9.85e-06	0.00653
458	Leukocyte_Other,IDO1	Leukocyte_Other	371	16513	0.0311	0.0147	1.97	0.984	3.85	0.0576	1
459	Leukocyte_Other,MRC1	Leukocyte_Other	1025	16513	0.048	0.095	0.503	0.314	0.797	0.0023	1
460	Leukocyte_Other,TGM2	Leukocyte_Other	663	16513	0.0257	0.0672	0.296	0.188	0.479	1.13e-06	0.000751
461	Leukocyte_Other	Immune_All	16513	217350	0.0791	0.0682	1.21	0.764	1.89	0.455	1
462	Tumor_All,PDL1,KI67	Tumor_All,PDL1	311	3954	0.0653	0	1	1	1500	0.266	1
463	Tumor_All,B7H3,KI67	Tumor_All,B7H3	62733	373182	0.123	0.134	0.964	0.681	1.29	0.803	1
464	Tumor_All,IDO1,KI67	Tumor_All,IDO1	488	7227	0.0316	0.0553	1	0.379	3.18	0.846	1
465	Tumor_All,B2M,KI67	Tumor_All,B2M	32105	140687	0.129	0.133	1.09	0.739	1.55	0.638	1
466	Tumor_All,MHCI,KI67	Tumor_All,MHCI	40847	228913	0.123	0.14	0.869	0.617	1.2	0.365	1
467	Tumor_All,MHCII,KI67	Tumor_All,MHCII	1246	9479	0.121	0.101	1.4	0.921	2.31	0.126	1
468	Tumor_All,PDL1,B7H3,IDO1,KI67	Tumor_All,PDL1,B7H3,IDO1	20	1022	0	0.75	1.04e-05	1.54e-09	0.0147	0.00884	1
469	Tumor_All,PDL1,B7H3,IDO1-,KI67	Tumor_All,PDL1,B7H3,IDO1-	278	2761	0.111	0	979	1	3030	0.178	1
470	Tumor_All,PDL1,B7H3-,IDO1,KI67	Tumor_All,PDL1,B7H3-,IDO1	1	6	0	0	1	1.54e-09	1	1	1
471	Tumor_All,PDL1-,B7H3,IDO1,KI67	Tumor_All,PDL1-,B7H3,IDO1	312	4068	0.0385	0.0357	1	0.571	111	0.588	1
472	Tumor_All,PDL1,B7H3-,IDO1-,KI67	Tumor_All,PDL1,B7H3-,IDO1-	12	165	0	0	1	0.00181	1	1	1
473	Tumor_All,PDL1-,B7H3,IDO1-,KI67	Tumor_All,PDL1-,B7H3,IDO1-	62123	365331	0.131	0.134	1.03	0.733	1.39	0.88	1
474	Tumor_All,PDL1-,B7H3-,IDO1,KI67	Tumor_All,PDL1-,B7H3-,IDO1	155	2131	0	0	1	0.00855	1	1	1
475	Tumor_All,PDL1-,B7H3-,IDO1-,KI67	Tumor_All,PDL1-,B7H3-,IDO1-	17299	144371	0.0573	0.107	0.456	0.121	0.871	0.0138	1
476	Tumor_All,B2M,MHCI,MHCII,KI67	Tumor_All,B2M,MHCI,MHCII	995	6034	0.118	0.0968	1.52	0.933	2.8	0.12	1
477	Tumor_All,B2M,MHCI,MHCII-,KI67	Tumor_All,B2M,MHCI,MHCII-	28395	126706	0.127	0.136	1.02	0.674	1.44	0.909	1
478	Tumor_All,B2M,MHCI-,MHCII,KI67	Tumor_All,B2M,MHCI-,MHCII	34	251	0.3	0	1	0.00055	38200	0.448	1
479	Tumor_All,B2M-,MHCI,MHCII,KI67	Tumor_All,B2M-,MHCI,MHCII	119	1954	0	0.0352	1	0.00163	1	0.546	1
480	Tumor_All,B2M,MHCI-,MHCII-,KI67	Tumor_All,B2M,MHCI-,MHCII-	2681	7696	0.352	0.117	2.18	0.824	11.1	0.254	1
481	Tumor_All,B2M-,MHCI,MHCII-,KI67	Tumor_All,B2M-,MHCI,MHCII-	11338	94219	0.0858	0.14	0.553	0.358	0.873	0.00703	1
482	Tumor_All,B2M-,MHCI-,MHCII,KI67	Tumor_All,B2M-,MHCI-,MHCII	98	1240	0.0769	0.0476	1	0.00267	2120	0.523	1
483	Tumor_All,B2M-,MHCI-,MHCII-,KI67	Tumor_All,B2M-,MHCI-,MHCII-	36540	281755	0.0684	0.106	0.63	0.245	1.15	0.184	1
484	Tumor_All,KI67	Tumor_All	80200	519855	0.123	0.116	1.03	0.783	1.36	0.818	1
485	Tumor_All,PDL1	Tumor_All	3954	519855	0.0157	0	90.4	31.2	268	3.11e-12	2.06e-09
486	Tumor_All,B7H3	Tumor_All	373182	519855	0.996	0.718	33.4	7.23	121	4.75e-07	0.000315
487	Tumor_All,IDO1	Tumor_All	7227	519855	0.0392	0.00122	29.6	12.9	86.8	1.22e-10	8.08e-08
488	Tumor_All,B2M	Tumor_All	140687	519855	0.775	0.0576	47.4	17.5	104	2.41e-10	1.6e-07
489	Tumor_All,MHCI	Tumor_All	228913	519855	0.988	0.21	183	47.6	697	3.87e-10	2.56e-07
490	Tumor_All,MHCII	Tumor_All	9479	519855	0.023	0.0135	1.71	1.24	2.35	0.00104	0.692
491	Tumor_All,PDL1,B7H3,IDO1	Tumor_All	1022	519855	0.0042	0	88.1	15.6	204	9.97e-14	6.61e-11
492	Tumor_All,PDL1,B7H3,IDO1-	Tumor_All	2761	519855	0.00744	0	122	29.5	210	3.17e-12	2.1e-09
493	Tumor_All,PDL1,B7H3-,IDO1	Tumor_All	6	519855	0	0	1	1	1	1	1
494	Tumor_All,PDL1-,B7H3,IDO1	Tumor_All	4068	519855	0.031	0.000561	45	17.6	107	2.12e-11	1.41e-08
495	Tumor_All,PDL1,B7H3-,IDO1-	Tumor_All	165	519855	0	0	1	1	1	1	1
496	Tumor_All,PDL1-,B7H3,IDO1-	Tumor_All	365331	519855	0.857	0.717	2.27	1.09	4.65	0.0327	1
497	Tumor_All,PDL1-,B7H3-,IDO1	Tumor_All	2131	519855	0	0.000259	1	0.447	1	0.654	1
498	Tumor_All,PDL1-,B7H3-,IDO1-	Tumor_All	144371	519855	0.00399	0.281	0.0285	0.0075	0.123	9.6e-08	6.36e-05
499	Tumor_All,B2M,MHCI,MHCII	Tumor_All	6034	519855	0.0212	0.00517	3.54	2.23	5.46	5.4e-07	0.000358
500	Tumor_All,B2M,MHCI,MHCII-	Tumor_All	126706	519855	0.739	0.0261	64.3	18.9	172	3.44e-10	2.28e-07
501	Tumor_All,B2M,MHCI-,MHCII	Tumor_All	251	519855	0	0.00028	0.203	0.0961	1	1.42e-05	0.00939
502	Tumor_All,B2M-,MHCI,MHCII	Tumor_All	1954	519855	0.000868	0.00141	0.598	0.253	1	0.084	1
503	Tumor_All,B2M,MHCI-,MHCII-	Tumor_All	7696	519855	0	0.00208	0.117	0.0349	0.634	0.00208	1
504	Tumor_All,B2M-,MHCI,MHCII-	Tumor_All	94219	519855	0.171	0.067	2.23	1.05	3.92	0.0378	1
505	Tumor_All,B2M-,MHCI-,MHCII	Tumor_All	1240	519855	0	0.00159	0.0411	0.0228	0.114	1.23e-09	8.18e-07
506	Tumor_All,B2M-,MHCI-,MHCII-	Tumor_All	281755	519855	0.00999	0.761	0.0072	0.00194	0.0213	7.76e-11	5.15e-08
507	Tumor_All	DAPI	519855	890565	0.38	0.669	0.24	0.155	0.394	1.9e-10	1.26e-07
508	Immune_All,KI67	Immune_All	26425	217350	0.144	0.0678	2.27	1.74	2.9	2.65e-07	0.000176
509	Immune_All	DAPI	217350	890565	0.463	0.142	5.16	3.65	7.39	6.36e-14	4.22e-11
996	Immune_All,B2M	Immune_All	180512	217350	0.872	0.743	2.14	1.46	3.01	0.00082	0.543
997	T_All,B2M	T_All	104775	114998	0.917	0.932	0.717	0.408	1.12	0.141	1
998	B_All,B2M	B_All	5867	6438	0.927	0.944	0.781	0.0792	1.55	0.443	1
999	NK_All,B2M	NK_All	12738	20397	0.686	0.557	1.39	0.869	2.18	0.186	1
1000	Macrophage_All,B2M	Macrophage_All	45884	59004	0.887	0.738	2.54	1.88	3.39	5.94e-07	0.000394
1001	Leukocyte_Other,B2M	Leukocyte_Other	11248	16513	0.829	0.545	2.63	1.59	4.47	0.000505	0.335
1002	T_null,B2M	T_null	1735	2124	0.827	0.897	0.545	0.11	1.21	0.159	1
1003	T_CD4,B2M	T_CD4	37566	41844	0.906	0.95	0.494	0.233	0.867	0.0149	1
1004	T_CD8,B2M	T_CD8	52984	57596	0.921	0.953	0.596	0.3	0.977	0.0364	1
1005	T_CD4/CD8,B2M	T_CD4/CD8	2189	2295	0.966	1	0.394	0.00108	1	0.000629	0.417
1006	T_regDN,B2M	T_regDN	131	171	0.923	1	1	0.667	3.5	0.881	1
1007	T_reg4,B2M	T_reg4	9542	10263	0.947	1	0.124	0.00123	0.741	0.00654	1
1008	T_reg8,B2M	T_reg8	628	705	0.941	1	1	0.000629	1	0.184	1
1009	NK,B2M	NK	10099	17577	0.626	0.524	1.37	0.849	2.03	0.195	1
1010	NKT,B2M	NKT	504	569	0.903	1	1	0.000354	1	0.0151	1
1011	NKT_CD8,B2M	NKT_CD8	993	1046	0.955	1	1	0.000773	1	0.000529	0.351
1012	NKT_CD4,B2M	NKT_CD4	1142	1205	0.976	1	1	0.000786	1	0.000743	0.493
1013	Macrophage_MHCII+,B2M	Macrophage_MHCII+	22653	25951	0.946	0.847	2.65	1.58	4.23	0.000802	0.532
1014	Macrophage_MHCII-,B2M	Macrophage_MHCII-	11419	15588	0.795	0.7	1.53	1.05	2.15	0.0296	1
1015	Macrophage_Other,B2M	Macrophage_Other	11812	17465	0.829	0.62	2.8	1.87	4.12	4.23e-06	0.0028
1016	Immune_All,MHCI	Immune_All	186082	217350	0.942	0.835	4.02	2.19	8.74	1.41e-05	0.00938
1017	T_All,MHCI	T_All	108334	114998	0.98	0.964	2.16	0.904	5.56	0.0926	1
1018	B_All,MHCI	B_All	5968	6438	0.984	0.895	3.87	1	33.8	0.0384	1
1019	NK_All,MHCI	NK_All	12663	20397	0.787	0.66	1.94	1.02	3.66	0.0366	1
1020	Macrophage_All,MHCI	Macrophage_All	45444	59004	0.929	0.735	4.99	2.63	9.86	2.7e-06	0.00179
1021	Leukocyte_Other,MHCI	Leukocyte_Other	13673	16513	0.897	0.753	6.8	2.34	15.7	0.000647	0.429
1022	T_null,MHCI	T_null	1880	2124	0.951	0.933	1	1	2.25	0.56	1
1023	T_CD4,MHCI	T_CD4	38789	41844	0.969	0.959	1.29	0.639	3.89	0.452	1
1024	T_CD8,MHCI	T_CD8	55032	57596	0.985	0.968	1.93	0.751	6.03	0.181	1
1025	T_CD4/CD8,MHCI	T_CD4/CD8	2226	2295	1	1	1	1	1	0.614	1
1026	T_regDN,MHCI	T_regDN	154	171	1	1	1	1	1	0.068	1
1027	T_reg4,MHCI	T_reg4	9567	10263	0.977	0.989	1	0.198	1.09	0.473	1
1028	T_reg8,MHCI	T_reg8	686	705	1	1	1	1	1	0.436	1
1029	NK,MHCI	NK	10101	17577	0.691	0.596	1.94	1.04	3.69	0.0326	1
1030	NKT,MHCI	NKT	532	569	1	1	1	1	1	0.676	1
1031	NKT_CD8,MHCI	NKT_CD8	984	1046	1	1	1	1	1	0.191	1
1032	NKT_CD4,MHCI	NKT_CD4	1046	1205	1	1	1	1	1	0.654	1
1033	Macrophage_MHCII+,MHCI	Macrophage_MHCII+	21528	25951	0.969	0.828	5.97	2.34	15.7	0.000129	0.0858
1034	Macrophage_MHCII-,MHCI	Macrophage_MHCII-	10476	15588	0.777	0.599	2.69	1.43	5.87	0.00279	1
1035	Macrophage_Other,MHCI	Macrophage_Other	13440	17465	0.944	0.798	5.03	2.56	10.8	3.41e-05	0.0226
1036	Immune_All,MHCII	Immune_All	93984	217350	0.495	0.431	1.43	1.07	1.9	0.0127	1
1037	T_All,MHCII	T_All	45061	114998	0.446	0.315	1.71	1.26	2.26	0.00129	0.858
1038	B_All,MHCII	B_All	3431	6438	0.649	0.5	1.54	0.722	3.46	0.25	1
1039	NK_All,MHCII	NK_All	4204	20397	0.264	0.167	1.78	1.17	2.88	0.0106	1
1040	Leukocyte_Other,MHCII	Leukocyte_Other	8000	16513	0.557	0.393	1.7	1.17	2.52	0.00744	1
1041	T_null,MHCII	T_null	700	2124	0.394	0.2	2.67	1.33	15	0.00348	1
1042	T_CD8,MHCII	T_CD8	20880	57596	0.432	0.318	1.65	1.18	2.35	0.00308	1
1043	T_CD4/CD8,MHCII	T_CD4/CD8	1162	2295	0.569	0.533	1.17	0.707	2.12	0.573	1
1044	T_reg8,MHCII	T_reg8	264	705	0.333	0	6360	2.53	12700	0.000504	0.334
1045	NK,MHCII	NK	2868	17577	0.223	0.123	2.37	1.44	4.08	0.000696	0.461
1046	NKT,MHCII	NKT	237	569	0.4	0.5	0.438	0.000138	1.25	0.227	1
1047	NKT_CD8,MHCII	NKT_CD8	506	1046	0.5	0.5	0.8	0.000118	1.63	0.423	1
1048	NKT_CD4,MHCII	NKT_CD4	593	1205	0.543	0.667	0.6	0.111	1	0.135	1
1049	Macrophage_MHCII+,MHCII	Macrophage_MHCII+	25951	25951	1	1
1050	Macrophage_MHCII-,MHCII	Macrophage_MHCII-	0	15588	0	0				1	1
1051	Macrophage_Other,MHCII	Macrophage_Other	7337	17465	0.583	0.436	1.78	1.16	2.65	0.00619	1
1052	Immune_All,B2M,KI67	Immune_All,B2M	24264	180512	0.149	0.0762	2.17	1.69	2.82	3.44e-07	0.000228
1053	T_All,B2M,KI67	T_All,B2M	17821	104775	0.181	0.0575	3.62	2.66	4.91	2.13e-10	1.41e-07
1054	B_All,B2M,KI67	B_All,B2M	226	5867	0.0301	0	2.06	1	233	0.0468	1
1055	NK_All,B2M,KI67	NK_All,B2M	1250	12738	0.134	0.0435	3.56	2.1	6.55	9.06e-06	0.00601
1056	Macrophage_All,B2M,KI67	Macrophage_All,B2M	3576	45884	0.0534	0.078	0.724	0.535	1	0.0492	1
1057	Leukocyte_Other,B2M,KI67	Leukocyte_Other,B2M	1391	11248	0.117	0.101	1.05	0.764	1.44	0.771	1
1058	T_null,B2M,KI67	T_null,B2M	229	1735	0.123	0	2830	1270	3510	5.38e-09	3.57e-06
1059	T_CD4,B2M,KI67	T_CD4,B2M	3620	37566	0.101	0.0436	2.53	1.8	3.56	1.78e-06	0.00118
1060	T_CD8,B2M,KI67	T_CD8,B2M	11425	52984	0.192	0.0435	5.82	3.82	9.31	2.19e-11	1.45e-08
1061	T_CD4/CD8,B2M,KI67	T_CD4/CD8,B2M	263	2189	0.163	0	2120	6.67	4240	5.21e-07	0.000345
1062	T_regDN,B2M,KI67	T_regDN,B2M	42	131	0.286	0	6360	1	12700	0.0447	1
1063	T_reg4,B2M,KI67	T_reg4,B2M	2051	9542	0.27	0.0563	7.09	4.16	29.3	6.65e-11	4.41e-08
1064	T_reg8,B2M,KI67	T_reg8,B2M	191	628	0.25	0	7130	1.62	9540	0.00031	0.206
1065	NK,B2M,KI67	NK,B2M	887	10099	0.104	0.0323	3.31	1.89	6.07	7.9e-05	0.0524
1066	NKT,B2M,KI67	NKT,B2M	59	504	0.111	0	4	1	3180	0.0161	1
1067	NKT_CD8,B2M,KI67	NKT_CD8,B2M	216	993	0.214	0	1.89	1	4240	0.0634	1
1068	NKT_CD4,B2M,KI67	NKT_CD4,B2M	88	1142	0.0192	0	1	1	2.2	0.338	1
1069	Macrophage_MHCII+,B2M,KI67	Macrophage_MHCII+,B2M	1432	22653	0.0421	0.0648	0.757	0.528	1.18	0.217	1
1070	Macrophage_MHCII-,B2M,KI67	Macrophage_MHCII-,B2M	1115	11419	0.0625	0.064	0.875	0.554	1.28	0.44	1
1071	Macrophage_Other,B2M,KI67	Macrophage_Other,B2M	1029	11812	0.0614	0.0769	0.803	0.602	1.12	0.175	1
1072	Immune_All,MHCI,KI67	Immune_All,MHCI	24798	186082	0.15	0.0767	2.06	1.62	2.6	1.34e-06	0.00089
1073	T_All,MHCI,KI67	T_All,MHCI	18089	108334	0.178	0.061	3.5	2.52	4.75	3.43e-10	2.27e-07
1074	B_All,MHCI,KI67	B_All,MHCI	228	5968	0.036	0	2	1	147	0.0607	1
1075	NK_All,MHCI,KI67	NK_All,MHCI	1220	12663	0.13	0.0408	3.38	1.92	7.54	1.44e-05	0.00956
1076	Macrophage_All,MHCI,KI67	Macrophage_All,MHCI	3639	45444	0.0517	0.0838	0.637	0.469	0.847	0.00372	1
1077	Leukocyte_Other,MHCI,KI67	Leukocyte_Other,MHCI	1622	13673	0.104	0.11	0.959	0.715	1.29	0.822	1
1078	T_null,MHCI,KI67	T_null,MHCI	249	1880	0.129	0	1820	749	3370	3.02e-07	0.0002
1079	T_CD4,MHCI,KI67	T_CD4,MHCI	3704	38789	0.102	0.047	2.38	1.67	3.4	4.69e-06	0.00311
1080	T_CD8,MHCI,KI67	T_CD8,MHCI	11596	55032	0.204	0.0417	6.15	3.99	10.4	1.02e-11	6.77e-09
1081	T_CD4/CD8,MHCI,KI67	T_CD4/CD8,MHCI	262	2226	0.16	0	2020	7.12	3640	8.32e-07	0.000552
1082	T_regDN,MHCI,KI67	T_regDN,MHCI	46	154	0.286	0	7270	1	12700	0.005	1
1083	T_reg4,MHCI,KI67	T_reg4,MHCI	2034	9567	0.248	0.0484	7.95	4.36	1430	9.43e-10	6.25e-07
1084	T_reg8,MHCI,KI67	T_reg8,MHCI	198	686	0.229	0	6360	1.6	8480	0.000449	0.297
1085	NK,MHCI,KI67	NK,MHCI	867	10101	0.0968	0.0345	3.03	1.69	7.03	0.000263	0.174
1086	NKT,MHCI,KI67	NKT,MHCI	58	532	0.0777	0	1	1	1760	0.142	1
1087	NKT_CD8,MHCI,KI67	NKT_CD8,MHCI	210	984	0.213	0	821	1	5090	0.0553	1
1088	NKT_CD4,MHCI,KI67	NKT_CD4,MHCI	85	1046	0.0172	0	1	1	1.93	0.422	1
1089	Macrophage_MHCII+,MHCI,KI67	Macrophage_MHCII+,MHCI	1436	21528	0.0433	0.0762	0.656	0.463	0.977	0.0364	1
1090	Macrophage_MHCII-,MHCI,KI67	Macrophage_MHCII-,MHCI	1083	10476	0.0517	0.0889	0.63	0.392	1	0.0341	1
1091	Macrophage_Other,MHCI,KI67	Macrophage_Other,MHCI	1120	13440	0.0568	0.0769	0.802	0.59	1.1	0.183	1
1092	Immune_All,MHCII,KI67	Immune_All,MHCII	11764	93984	0.153	0.0703	2.14	1.67	2.73	1.78e-07	0.000118
1093	T_All,MHCII,KI67	T_All,MHCII	7988	45061	0.202	0.0667	3.72	2.69	5.13	3.24e-10	2.15e-07
1094	B_All,MHCII,KI67	B_All,MHCII	143	3431	0.0287	0	325	1	749	0.000493	0.327
1095	NK_All,MHCII,KI67	NK_All,MHCII	504	4204	0.144	0.046	3.47	1.88	10.1	5.3e-05	0.0351
1096	Leukocyte_Other,MHCII,KI67	Leukocyte_Other,MHCII	921	8000	0.1	0.143	0.744	0.541	1.07	0.102	1
1097	T_null,MHCII,KI67	T_null,MHCII	98	700	0.125	0	3180	1	3640	0.000207	0.137
1098	T_CD8,MHCII,KI67	T_CD8,MHCII	4753	20880	0.228	0.0385	9.28	4.76	2450	3.29e-12	2.18e-09
1099	T_CD4/CD8,MHCII,KI67	T_CD4/CD8,MHCII	143	1162	0.167	0	2420	1310	5090	7.96e-07	0.000528
1100	T_reg8,MHCII,KI67	T_reg8,MHCII	84	264	0.3	0	6360	1	23800	0.0425	1
1101	NK,MHCII,KI67	NK,MHCII	295	2868	0.127	0.0348	2.69	1.19	10.3	0.00429	1
1102	NKT,MHCII,KI67	NKT,MHCII	30	237	0	0	1	1	1	1	1
1103	NKT_CD8,MHCII,KI67	NKT_CD8,MHCII	133	506	0.25	0	1	1	8480	0.13	1
1104	NKT_CD4,MHCII,KI67	NKT_CD4,MHCII	46	593	0	0	1	1	1	1	1
1105	Macrophage_MHCII+,MHCII,KI67	Macrophage_MHCII+,MHCII	1574	25951	0.0397	0.062	0.799	0.568	1.24	0.277	1
1106	Macrophage_MHCII-,MHCII,KI67	Macrophage_MHCII-,MHCII	0	0	0	0				1	1
1107	Macrophage_Other,MHCII,KI67	Macrophage_Other,MHCII	634	7337	0.0577	0.0764	0.813	0.553	1.18	0.281	1
1108	T_All,B2M-,MHCI-,MHCII-	T_All	2542	114998	0.00659	0.0201	0.496	0.2	1.15	0.116	1
1109	T_All,B2M-,MHCI-,MHCII	T_All	75	114998	0	0	1	1	1	1	1
1110	T_All,B2M-,MHCI,MHCII-	T_All	6597	114998	0.044	0.0121	4.77	1.93	18.5	0.000343	0.228
1111	T_All,B2M,MHCI-,MHCII-	T_All	3662	114998	0.00757	0.0135	0.892	0.291	1.66	0.522	1
1112	T_All,B2M-,MHCI,MHCII	T_All	1009	114998	0.00701	0	45	4.29	105	5.1e-06	0.00338
1113	T_All,B2M,MHCI-,MHCII	T_All	385	114998	0	0	1	0.174	1	1	1
1114	T_All,B2M,MHCI,MHCII-	T_All	57136	114998	0.438	0.488	0.678	0.512	0.911	0.0127	1
1115	T_All,B2M,MHCI,MHCII	T_All	43592	114998	0.443	0.286	1.83	1.35	2.45	0.000253	0.167
1116	T_All,B2M-,MHCI-,MHCII-,KI67	T_All,B2M-,MHCI-,MHCII-	185	2542	0	0	1	1	1	1	1
1117	T_All,B2M-,MHCI-,MHCII,KI67	T_All,B2M-,MHCI-,MHCII	3	75	0	0	1	1	1	1	1
1118	T_All,B2M-,MHCI,MHCII-,KI67	T_All,B2M-,MHCI,MHCII-	510	6597	0.0905	0	890	3.13	2150	8.92e-06	0.00591
1119	T_All,B2M,MHCI-,MHCII-,KI67	T_All,B2M,MHCI-,MHCII-	304	3662	0.0632	0	636	1	1610	5.82e-05	0.0386
1120	T_All,B2M-,MHCI,MHCII,KI67	T_All,B2M-,MHCI,MHCII	70	1009	0.0526	0	1210	1	2550	8.71e-06	0.00578
1121	T_All,B2M,MHCI-,MHCII,KI67	T_All,B2M,MHCI-,MHCII	8	385	0	0	1	1	1	1	1
1122	T_All,B2M,MHCI,MHCII-,KI67	T_All,B2M,MHCI,MHCII-	9602	57136	0.159	0.0544	3.85	2.76	5.72	1.31e-09	8.69e-07
1123	T_All,B2M,MHCI,MHCII,KI67	T_All,B2M,MHCI,MHCII	7907	43592	0.205	0.0692	3.71	2.67	5.28	6.2e-10	4.11e-07
1124	B_All,B2M-,MHCI-,MHCII-	B_All	224	6438	0	0.00362	1	0.329	1	0.308	1
1125	B_All,B2M-,MHCI-,MHCII	B_All	10	6438	0	0	1	1	1	1	1
1126	B_All,B2M-,MHCI,MHCII-	B_All	293	6438	0.0277	0	414	1	733	4.82e-05	0.0319
1127	B_All,B2M,MHCI-,MHCII-	B_All	196	6438	0	0	1	1	3.34	1	1
1128	B_All,B2M-,MHCI,MHCII	B_All	44	6438	0	0	1	1	1	1	1
1129	B_All,B2M,MHCI-,MHCII	B_All	40	6438	0	0	1	1	1	1	1
1130	B_All,B2M,MHCI,MHCII-	B_All	2294	6438	0.254	0.333	0.742	0.352	2.71	0.391	1
1131	B_All,B2M,MHCI,MHCII	B_All	3337	6438	0.629	0.333	3.27	1.5	5.95	0.00235	1
1132	B_All,B2M-,MHCI-,MHCII-,KI67	B_All,B2M-,MHCI-,MHCII-	14	224	0	0	1	1	1	1	1
1133	B_All,B2M-,MHCI-,MHCII,KI67	B_All,B2M-,MHCI-,MHCII	2	10	0	0	1	1.54e-09	1	1	1
1134	B_All,B2M-,MHCI,MHCII-,KI67	B_All,B2M-,MHCI,MHCII-	8	293	0	0	1	1	1	1	1
1135	B_All,B2M,MHCI-,MHCII-,KI67	B_All,B2M,MHCI-,MHCII-	7	196	0	0	1	1	1	1	1
1136	B_All,B2M-,MHCI,MHCII,KI67	B_All,B2M-,MHCI,MHCII	1	44	0	0	1	1	4240	1	1
1137	B_All,B2M,MHCI-,MHCII,KI67	B_All,B2M,MHCI-,MHCII	0	40	0	0				1	1
1138	B_All,B2M,MHCI,MHCII-,KI67	B_All,B2M,MHCI,MHCII-	79	2294	0	0.0144	1	0.417	1	0.419	1
1139	B_All,B2M,MHCI,MHCII,KI67	B_All,B2M,MHCI,MHCII	140	3337	0.0293	0	335	1	771	0.000353	0.234
1140	NK_All,B2M-,MHCI-,MHCII-	NK_All	5273	20397	0.139	0.25	0.569	0.315	1.05	0.0747	1
1141	NK_All,B2M-,MHCI-,MHCII	NK_All	311	20397	0	0	1	0.259	1	1	1
1142	NK_All,B2M-,MHCI,MHCII-	NK_All	1843	20397	0.111	0.0277	4.06	1.81	11.9	0.000449	0.297
1143	NK_All,B2M,MHCI-,MHCII-	NK_All	1651	20397	0.0517	0.0233	1.3	1	4.09	0.174	1
1144	NK_All,B2M-,MHCI,MHCII	NK_All	232	20397	0.0082	0	3.82	1	76.9	0.00347	1
1145	NK_All,B2M,MHCI-,MHCII	NK_All	499	20397	0.0032	0	1	1	1	0.845	1
1146	NK_All,B2M,MHCI,MHCII-	NK_All	7426	20397	0.331	0.27	0.975	0.617	1.5	0.932	1
1147	NK_All,B2M,MHCI,MHCII	NK_All	3162	20397	0.222	0.11	2.63	1.69	4.54	0.000171	0.113
1148	NK_All,B2M-,MHCI-,MHCII-,KI67	NK_All,B2M-,MHCI-,MHCII-	198	5273	0.00331	0	1	1	2.57	0.284	1
1149	NK_All,B2M-,MHCI-,MHCII,KI67	NK_All,B2M-,MHCI-,MHCII	9	311	0	0	1	1	1	1	1
1150	NK_All,B2M-,MHCI,MHCII-,KI67	NK_All,B2M-,MHCI,MHCII-	98	1843	0	0	1	1	1.12	1	1
1151	NK_All,B2M,MHCI-,MHCII-,KI67	NK_All,B2M,MHCI-,MHCII-	119	1651	0.0323	0	1	1	1020	0.00309	1
1152	NK_All,B2M-,MHCI,MHCII,KI67	NK_All,B2M-,MHCI,MHCII	17	232	0	0	1	1	1	1	1
1153	NK_All,B2M,MHCI-,MHCII,KI67	NK_All,B2M,MHCI-,MHCII	26	499	0	0	1	1	1	1	1
1154	NK_All,B2M,MHCI,MHCII-,KI67	NK_All,B2M,MHCI,MHCII-	653	7426	0.126	0.0303	4.38	2.05	322	3.7e-05	0.0245
1155	NK_All,B2M,MHCI,MHCII,KI67	NK_All,B2M,MHCI,MHCII	452	3162	0.161	0.0407	3.92	1.52	1760	0.000626	0.415
1156	Macrophage_All,B2M-,MHCI-,MHCII-	Macrophage_All	4719	59004	0.0149	0.0818	0.176	0.0854	0.331	6.86e-07	0.000455
1157	Macrophage_All,B2M-,MHCI-,MHCII	Macrophage_All	2384	59004	0.00267	0.0448	0.076	0.0227	0.209	5.15e-07	0.000341
1158	Macrophage_All,B2M-,MHCI,MHCII-	Macrophage_All	3613	59004	0.04	0.0456	0.827	0.528	1.28	0.396	1
1159	Macrophage_All,B2M,MHCI-,MHCII-	Macrophage_All	3273	59004	0.0244	0.0422	0.498	0.225	1	0.0547	1
1160	Macrophage_All,B2M-,MHCI,MHCII	Macrophage_All	2404	59004	0.0402	0.0224	1.54	0.864	3.07	0.154	1
1161	Macrophage_All,B2M,MHCI-,MHCII	Macrophage_All	3184	59004	0.00876	0.0311	0.349	0.124	0.956	0.0116	1
1162	Macrophage_All,B2M,MHCI,MHCII-	Macrophage_All	14111	59004	0.165	0.228	0.637	0.442	0.947	0.0235	1
1163	Macrophage_All,B2M,MHCI,MHCII	Macrophage_All	25316	59004	0.601	0.294	3.29	2.34	4.43	1.16e-08	7.67e-06
1164	Macrophage_All,B2M-,MHCI-,MHCII-,KI67	Macrophage_All,B2M-,MHCI-,MHCII-	186	4719	0	0.0256	1	0.382	1	0.39	1
1165	Macrophage_All,B2M-,MHCI-,MHCII,KI67	Macrophage_All,B2M-,MHCI-,MHCII	83	2384	0	0.026	0.00161	0.000982	1	0.000178	0.118
1166	Macrophage_All,B2M-,MHCI,MHCII-,KI67	Macrophage_All,B2M-,MHCI,MHCII-	230	3613	0.0375	0.0303	1	0.867	1.22	1	1
1167	Macrophage_All,B2M,MHCI-,MHCII-,KI67	Macrophage_All,B2M,MHCI-,MHCII-	193	3273	0.069	0	2.43	1	16.2	0.00836	1
1168	Macrophage_All,B2M-,MHCI,MHCII,KI67	Macrophage_All,B2M-,MHCI,MHCII	158	2404	0.0133	0	1	0.725	1	0.691	1
1169	Macrophage_All,B2M,MHCI-,MHCII,KI67	Macrophage_All,B2M,MHCI-,MHCII	132	3184	0	0.0118	1	1	1	0.996	1
1170	Macrophage_All,B2M,MHCI,MHCII-,KI67	Macrophage_All,B2M,MHCI,MHCII-	1416	14111	0.0544	0.0891	0.743	0.537	1.09	0.159	1
1171	Macrophage_All,B2M,MHCI,MHCII,KI67	Macrophage_All,B2M,MHCI,MHCII	1835	25316	0.0455	0.0829	0.613	0.448	0.846	0.00452	1

## Sheet: sig_fractions (n=77)
ID	Cell State (Numerator)	Population (Denominator)	Cell state cell count	Population cell count	Extreme responder median fraction (n=38)	Non-responder median fraction (n=74)	Odds Ratio	CI.low	CI.high	p.value	adjusted p.value
1	T_CD4,PD1,KI67	T_CD4,PD1	1575	8956	0.205	0.062	3.6	2.03	7.19	9.13e-06	0.00605
1000	Macrophage_All,B2M	Macrophage_All	45884	59004	0.887	0.738	2.54	1.88	3.39	5.94e-07	0.000394
1015	Macrophage_Other,B2M	Macrophage_Other	11812	17465	0.829	0.62	2.8	1.87	4.12	4.23e-06	0.0028
1016	Immune_All,MHCI	Immune_All	186082	217350	0.942	0.835	4.02	2.19	8.74	1.41e-05	0.00938
1020	Macrophage_All,MHCI	Macrophage_All	45444	59004	0.929	0.735	4.99	2.63	9.86	2.7e-06	0.00179
1035	Macrophage_Other,MHCI	Macrophage_Other	13440	17465	0.944	0.798	5.03	2.56	10.8	3.41e-05	0.0226
1053	T_All,B2M,KI67	T_All,B2M	17821	104775	0.181	0.0575	3.62	2.66	4.91	2.13e-10	1.41e-07
1060	T_CD8,B2M,KI67	T_CD8,B2M	11425	52984	0.192	0.0435	5.82	3.82	9.31	2.19e-11	1.45e-08
1063	T_reg4,B2M,KI67	T_reg4,B2M	2051	9542	0.27	0.0563	7.09	4.16	29.3	6.65e-11	4.41e-08
1073	T_All,MHCI,KI67	T_All,MHCI	18089	108334	0.178	0.061	3.5	2.52	4.75	3.43e-10	2.27e-07
1080	T_CD8,MHCI,KI67	T_CD8,MHCI	11596	55032	0.204	0.0417	6.15	3.99	10.4	1.02e-11	6.77e-09
1083	T_reg4,MHCI,KI67	T_reg4,MHCI	2034	9567	0.248	0.0484	7.95	4.36	1430	9.43e-10	6.25e-07
1093	T_All,MHCII,KI67	T_All,MHCII	7988	45061	0.202	0.0667	3.72	2.69	5.13	3.24e-10	2.15e-07
1098	T_CD8,MHCII,KI67	T_CD8,MHCII	4753	20880	0.228	0.0385	9.28	4.76	2450	3.29e-12	2.18e-09
1122	T_All,B2M,MHCI,MHCII-,KI67	T_All,B2M,MHCI,MHCII-	9602	57136	0.159	0.0544	3.85	2.76	5.72	1.31e-09	8.69e-07
1123	T_All,B2M,MHCI,MHCII,KI67	T_All,B2M,MHCI,MHCII	7907	43592	0.205	0.0692	3.71	2.67	5.28	6.2e-10	4.11e-07
1163	Macrophage_All,B2M,MHCI,MHCII	Macrophage_All	25316	59004	0.601	0.294	3.29	2.34	4.43	1.16e-08	7.67e-06
157	T_CD4/CD8,CD27	T_CD4/CD8	1573	2295	0.737	0.333	6.58	2.67	36.5	1.09e-05	0.00721
172	T_null,CD27	T_null	729	2124	0.393	0.133	4.33	1.87	7950	1.35e-05	0.00898
177	T_All,PD1,KI67	T_All,PD1	8667	33291	0.287	0.101	4.28	3.02	6.67	1.44e-10	9.56e-08
178	T_All,LAG3,KI67	T_All,LAG3	5347	13537	0.423	0.0945	9.77	5.37	26.7	6.08e-12	4.03e-09
179	T_All,TIM3,KI67	T_All,TIM3	15589	86959	0.2	0.0645	3.83	2.81	5.45	1.16e-10	7.72e-08
180	T_All,CD27,KI67	T_All,CD27	14435	64216	0.213	0.0707	4.04	2.69	6.73	1.57e-09	1.04e-06
181	T_All,ICOS,KI67	T_All,ICOS	11088	44379	0.268	0.0716	5.02	3.41	7.29	1.02e-10	6.74e-08
182	T_All,CD25,KI67	T_All,CD25	1421	5713	0.345	0.0909	4.75	2.77	8.44	7.22e-08	4.79e-05
183	T_All,KI67	T_All	18589	114998	0.177	0.0577	3.43	2.52	4.64	2.22e-10	1.47e-07
187	T_All,CD27	T_All	64216	114998	0.553	0.186	5.39	3.43	8.44	1.97e-10	1.31e-07
190	T_All	Immune_All	114998	217350	0.628	0.206	4.67	2.42	8.72	4.47e-09	2.97e-06
2	T_CD4,LAG3,KI67	T_CD4,LAG3	418	1644	0.375	0	10500	3180	14000	8.68e-10	5.75e-07
20	T_CD4,CD27	T_CD4	17291	41844	0.427	0.0902	6.49	3.83	10.3	7.05e-10	4.68e-07
273	NKT_CD8,PD1	NKT_CD8	379	1046	0.3	0	2550	1.74	10900	5.11e-05	0.0339
276	NKT_CD8,CD27	NKT_CD8	606	1046	0.5	0	8480	3.45	18500	2.04e-05	0.0135
283	NK_All,TIM3,KI67	NK_All,TIM3	1330	15157	0.147	0.0345	4.14	2.32	7.69	9.83e-06	0.00652
299	NK_All,CD27	NK_All	1559	20397	0.134	0.00437	36.8	8.46	530	1.87e-08	1.24e-05
328	Macrophage_MHCII+,B7H3	Macrophage_MHCII+	18851	25951	0.966	0.745	11.5	5.06	29.7	9.98e-08	6.62e-05
33	T_CD4	T_All	41844	114998	0.433	0.65	0.365	0.275	0.469	1.81e-07	0.00012
339	Macrophage_MHCII+,PDL1-,B7H3-,IDO1-	Macrophage_MHCII+	7001	25951	0.0329	0.24	0.0818	0.0313	0.183	4.31e-08	2.86e-05
36	T_CD8,PD1,KI67	T_CD8,PD1	6313	21354	0.318	0.0644	9.74	4.48	4130	3.41e-10	2.26e-07
361	Macrophage_MHCII-,B7H3	Macrophage_MHCII-	10235	15588	0.913	0.655	5.72	2.92	12.4	1.78e-05	0.0118
37	T_CD8,LAG3,KI67	T_CD8,LAG3	4563	10781	0.475	0.0927	10.9	5.28	81.1	1.91e-10	1.27e-07
372	Macrophage_MHCII-,PDL1-,B7H3-,IDO1-	Macrophage_MHCII-	5168	15588	0.0868	0.334	0.177	0.0823	0.349	3.34e-05	0.0221
373	Macrophage_MHCII-	Immune_All	15588	217350	0.0289	0.121	0.252	0.175	0.372	3.12e-07	0.000207
38	T_CD8,TIM3,KI67	T_CD8,TIM3	10570	45647	0.23	0.0522	6.39	3.86	11.4	5.89e-11	3.91e-08
39	T_CD8,CD27,KI67	T_CD8,CD27	10343	36435	0.272	0.0689	7.84	3.98	2120	6.26e-11	4.15e-08
393	Macrophage_Other,B7H3	Macrophage_Other	12673	17465	0.924	0.656	8.22	4.12	16.2	5.62e-08	3.73e-05
40	T_CD8,ICOS,KI67	T_CD8,ICOS	6043	21415	0.326	0.0128	106	7.23	6850	1.18e-12	7.83e-10
404	Macrophage_Other,PDL1-,B7H3-,IDO1-	Macrophage_Other	4623	17465	0.0759	0.328	0.124	0.0647	0.248	6.55e-08	4.34e-05
42	T_CD8,PD1,LAG3,TIM3,KI67	T_CD8,PD1,LAG3,TIM3	2809	6500	0.509	0.17	5.92	3.1	12.9	1.31e-06	0.000867
425	Macrophage_All,B7H3	Macrophage_All	41759	59004	0.943	0.681	9.5	4.89	19.5	4.42e-08	2.93e-05
43	T_CD8,PD1,LAG3-,TIM3,KI67	T_CD8,PD1,LAG3-,TIM3	2751	11071	0.266	0.0714	6.85	3.56	23.8	3.6e-09	2.38e-06
437	Macrophage_All,PDL1-,B7H3-,IDO1-	Macrophage_All	16792	59004	0.0569	0.306	0.103	0.0519	0.203	5.44e-08	3.61e-05
438	Macrophage_All	Immune_All	59004	217350	0.184	0.508	0.233	0.16	0.36	2.46e-09	1.63e-06
45	T_CD8,PD1-,LAG3,TIM3,KI67	T_CD8,PD1-,LAG3,TIM3	1656	3876	0.417	0	13400	5090	18200	3.45e-09	2.29e-06
457	Leukocyte_Other,B7H3	Leukocyte_Other	12149	16513	0.879	0.622	5.77	2.75	10.8	9.85e-06	0.00653
486	Tumor_All,B7H3	Tumor_All	373182	519855	0.996	0.718	33.4	7.23	121	4.75e-07	0.000315
488	Tumor_All,B2M	Tumor_All	140687	519855	0.775	0.0576	47.4	17.5	104	2.41e-10	1.6e-07
489	Tumor_All,MHCI	Tumor_All	228913	519855	0.988	0.21	183	47.6	697	3.87e-10	2.56e-07
498	Tumor_All,PDL1-,B7H3-,IDO1-	Tumor_All	144371	519855	0.00399	0.281	0.0285	0.0075	0.123	9.6e-08	6.36e-05
5	T_CD4,ICOS,KI67	T_CD4,ICOS	2656	13713	0.216	0.0739	3.6	2.32	5.8	4.56e-07	0.000302
50	T_CD8,KI67	T_CD8	11880	57596	0.188	0.0443	5.46	3.64	8.47	2.38e-11	1.58e-08
500	Tumor_All,B2M,MHCI,MHCII-	Tumor_All	126706	519855	0.739	0.0261	64.3	18.9	172	3.44e-10	2.28e-07
506	Tumor_All,B2M-,MHCI-,MHCII-	Tumor_All	281755	519855	0.00999	0.761	0.0072	0.00194	0.0213	7.76e-11	5.15e-08
507	Tumor_All	DAPI	519855	890565	0.38	0.669	0.24	0.155	0.394	1.9e-10	1.26e-07
509	Immune_All	DAPI	217350	890565	0.463	0.142	5.16	3.65	7.39	6.36e-14	4.22e-11
51	T_CD8,PD1	T_CD8	21354	57596	0.251	0.0898	4.05	2.36	8.51	1.08e-06	0.000713
54	T_CD8,CD27	T_CD8	36435	57596	0.527	0.2	5.35	3.11	10.2	4.78e-08	3.17e-05
57	T_CD8,PD1,LAG3,TIM3	T_CD8	6500	57596	0.071	0	625	8.88	1030	4.32e-08	2.86e-05
65	T_CD8	Immune_All	57596	217350	0.259	0.0425	7.51	3.87	12.5	1.62e-09	1.08e-06
66	T_CD8	T_All	57596	114998	0.41	0.21	2.46	1.99	3.17	1.08e-07	7.16e-05
68	T_reg4,PD1,KI67	T_reg4,PD1	496	1771	0.295	0.0458	10.5	2.84	5090	3.77e-05	0.025
70	T_reg4,TIM3,KI67	T_reg4,TIM3	1523	7485	0.262	0.0517	8.27	3.93	3690	2.48e-10	1.65e-07
71	T_reg4,CD27,KI67	T_reg4,CD27	1642	7568	0.266	0.0431	9.92	4.91	3180	1.03e-09	6.81e-07
72	T_reg4,ICOS,KI67	T_reg4,ICOS	1944	7324	0.296	0.0339	16.6	4.87	4770	8.27e-09	5.48e-06
73	T_reg4,CD25,KI67	T_reg4,CD25	982	3233	0.363	0.0741	8.28	3.42	3180	4.09e-07	0.000271
74	T_reg4,MHCII,KI67	T_reg4,MHCII	953	4472	0.249	0.0156	42.2	6.44	5660	1.08e-11	7.14e-09
80	T_reg4,PD1-,LAG3-,TIM3,KI67	T_reg4,PD1-,LAG3-,TIM3	1138	5980	0.25	0.0182	421	4.47	4590	6.59e-10	4.37e-07
83	T_reg4,KI67	T_reg4	2115	10263	0.241	0.0435	8.52	4.54	2610	2.36e-11	1.56e-08
87	T_reg4,CD27	T_reg4	7568	10263	0.79	0.571	2.75	1.81	3.88	2.34e-05	0.0155
9	T_CD4,PD1,LAG3-,TIM3,KI67	T_CD4,PD1,LAG3-,TIM3	886	4809	0.218	0.0485	4.67	2.22	17.8	1.87e-05	0.0124

## Sheet: sig_fractions_Fig3B (n=33)
ID	Cell State (Numerator)	Population (Denominator)	Cell state cell count	Population cell count	Extreme responder median fraction (n=38)	Non-responder median fraction (n=74)	Odds Ratio	CI.low	CI.high	p.value	adjusted p.value
500	Tumor_All,B2M,MHCI,MHCII-	Tumor_All	126706	519855	0.739	0.0261	64.3	18.9	172	3.44e-10	2.28e-07
506	Tumor_All,B2M-,MHCI-,MHCII-	Tumor_All	281755	519855	0.00999	0.761	0.0072	0.00194	0.0213	7.76e-11	5.15e-08
509	Immune_All	DAPI	217350	890565	0.463	0.142	5.16	3.65	7.39	6.36e-14	4.22e-11
190	T_All	Immune_All	114998	217350	0.628	0.206	4.67	2.42	8.72	4.47e-09	2.97e-06
66	T_CD8	T_All	57596	114998	0.41	0.21	2.46	1.99	3.17	1.08e-07	7.16e-05
33	T_CD4	T_All	41844	114998	0.433	0.65	0.365	0.275	0.469	1.81e-07	0.00012
438	Macrophage_All	Immune_All	59004	217350	0.184	0.508	0.233	0.16	0.36	2.46e-09	1.63e-06
373	Macrophage_MHCII-	Immune_All	15588	217350	0.0289	0.121	0.252	0.175	0.372	3.12e-07	0.000207
183	T_All,KI67	T_All	18589	114998	0.177	0.0577	3.43	2.52	4.64	2.22e-10	1.47e-07
50	T_CD8,KI67	T_CD8	11880	57596	0.188	0.0443	5.46	3.64	8.47	2.38e-11	1.58e-08
83	T_reg4,KI67	T_reg4	2115	10263	0.241	0.0435	8.52	4.54	2610	2.36e-11	1.56e-08
182	T_All,CD25,KI67	T_All,CD25	1421	5713	0.345	0.0909	4.75	2.77	8.44	7.22e-08	4.79e-05
73	T_reg4,CD25,KI67	T_reg4,CD25	982	3233	0.363	0.0741	8.28	3.42	3180	4.09e-07	0.000271
42	T_CD8,PD1,LAG3,TIM3,KI67	T_CD8,PD1,LAG3,TIM3	2809	6500	0.509	0.17	5.92	3.1	12.9	1.31e-06	0.000867
57	T_CD8,PD1,LAG3,TIM3	T_CD8	6500	57596	0.071	0	625	8.88	1030	4.32e-08	2.86e-05
51	T_CD8,PD1	T_CD8	21354	57596	0.251	0.0898	4.05	2.36	8.51	1.08e-06	0.000713
273	NKT_CD8,PD1	NKT_CD8	379	1046	0.3	0	2550	1.74	10900	5.11e-05	0.0339
187	T_All,CD27	T_All	64216	114998	0.553	0.186	5.39	3.43	8.44	1.97e-10	1.31e-07
54	T_CD8,CD27	T_CD8	36435	57596	0.527	0.2	5.35	3.11	10.2	4.78e-08	3.17e-05
20	T_CD4,CD27	T_CD4	17291	41844	0.427	0.0902	6.49	3.83	10.3	7.05e-10	4.68e-07
87	T_reg4,CD27	T_reg4	7568	10263	0.79	0.571	2.75	1.81	3.88	2.34e-05	0.0155
299	NK_All,CD27	NK_All	1559	20397	0.134	0.00437	36.8	8.46	530	1.87e-08	1.24e-05
276	NKT_CD8,CD27	NKT_CD8	606	1046	0.5	0	8480	3.45	18500	2.04e-05	0.0135
486	Tumor_All,B7H3	Tumor_All	373182	519855	0.996	0.718	33.4	7.23	121	4.75e-07	0.000315
425	Macrophage_All,B7H3	Macrophage_All	41759	59004	0.943	0.681	9.5	4.89	19.5	4.42e-08	2.93e-05
328	Macrophage_MHCII+,B7H3	Macrophage_MHCII+	18851	25951	0.966	0.745	11.5	5.06	29.7	9.98e-08	6.62e-05
361	Macrophage_MHCII-,B7H3	Macrophage_MHCII-	10235	15588	0.913	0.655	5.72	2.92	12.4	1.78e-05	0.0118
393	Macrophage_Other,B7H3	Macrophage_Other	12673	17465	0.924	0.656	8.22	4.12	16.2	5.62e-08	3.73e-05
498	Tumor_All,PDL1-,B7H3-,IDO1-	Tumor_All	144371	519855	0.00399	0.281	0.0285	0.0075	0.123	9.6e-08	6.36e-05
437	Macrophage_All,PDL1-,B7H3-,IDO1-	Macrophage_All	16792	59004	0.0569	0.306	0.103	0.0519	0.203	5.44e-08	3.61e-05
339	Macrophage_MHCII+,PDL1-,B7H3-,IDO1-	Macrophage_MHCII+	7001	25951	0.0329	0.24	0.0818	0.0313	0.183	4.31e-08	2.86e-05
372	Macrophage_MHCII-,PDL1-,B7H3-,IDO1-	Macrophage_MHCII-	5168	15588	0.0868	0.334	0.177	0.0823	0.349	3.34e-05	0.0221
404	Macrophage_Other,PDL1-,B7H3-,IDO1-	Macrophage_Other	4623	17465	0.0759	0.328	0.124	0.0647	0.248	6.55e-08	4.34e-05
