# Supplementary material for: Tumor MHC Class I Expression Associates with Intralesional IL2 Response in Melanoma
Source: Oxford University Press journal article supplement (doi:10.1158/2326-6066.cir-21-1083), 2022-01-10
Supplement: cir-21-1083_supplementary_data_supp13.xlsx [file cir-21-1083_supplementary_data_supp13.xlsx]

## Sheet: Sheet1
Cohort	Institution	Patient ID	IL-2 Treatment	Prior Therapies	Patient Response	No. Systemic IL-2 Cycles	No. Intralesional IL-2 Injections
Validation	Calgary	v_01	Intralesional	None	CR	NA	4
Validation	Calgary	v_02	Intralesional	None	CR	NA	8
Validation	Calgary	v_03	Intralesional	None	CR	NA	4
Validation	NIH	v_04	Systemic	None	CR	4	NA
Validation	NIH	v_05	Systemic	None	CR	5	NA
Validation	NIH	v_06	Systemic	None	CR	6	NA
Validation	NIH	v_07	Systemic	None	non-CR	1	NA
Validation	NIH	v_08	Systemic	None	non-CR	2	NA
Validation	NIH	v_09	Systemic	None	non-CR	1	NA
Validation	NIH	v_10	Systemic	None	non-CR	2	NA
Validation	NIH	v_11	Systemic	None	non-CR	2	NA
Validation	NIH	v_12	Systemic	None	non-CR	2	NA
Validation	NIH	v_13	Systemic	None	non-CR	2	NA
Validation	MDACC	v_14	Systemic	None	non-CR	2	NA
Validation	MDACC	v_15	Systemic	None	non-CR	2	NA
Validation	MDACC	v_16	Systemic	None	non-CR	2	NA
Validation	MDACC	v_17	Systemic	None	non-CR	2	NA
Validation	JHMI	v_18	Systemic	none	non-CR	6	NA
Validation	JHMI	v_19	Systemic	none	non-CR	4	NA
