# Supplementary material for: Tumor MHC Class I Expression Associates with Intralesional IL2 Response in Melanoma
Source: Oxford University Press journal article supplement (doi:10.1158/2326-6066.cir-21-1083), 2022-01-10
Supplement: cir-21-1083_supplementary_data_supp15.xlsx [file cir-21-1083_supplementary_data_supp15.xlsx]

## Sheet: all_fractions (n=685)
ID	Cell State (Numerator)	Population (Denominator)	Cell state cell count	Population cell count	Tumor_All MHCI Low median fraction	Tumor_All MHCI High median fraction	Odds Ratio	CI.low	CI.high	p.value	adjusted p.value
1	T_CD4,PD1,KI67	T_CD4,PD1	921	4041	0	0.154	0.333	0.000592	1	0.0223	1
2	T_CD4,LAG3,KI67	T_CD4,LAG3	292	1051	0	0.183	0.5	0.000106	1	0.00715	1
3	T_CD4,TIM3,KI67	T_CD4,TIM3	1824	14665	0	0.069	0.00296	0.00088	0.603	0.0001	0.0645
4	T_CD4,CD27,KI67	T_CD4,CD27	1200	8321	0	0.0952	0.000719	0.000451	0.375	9.23e-05	0.0593
5	T_CD4,ICOS,KI67	T_CD4,ICOS	1670	6392	0.0347	0.141	0.5	0.0665	1	0.0371	1
6	T_CD4,CD25,KI67	T_CD4,CD25	85	469	0	0.0625	1	0.000254	1	0.123	1
7	T_CD4,MHCII,KI67	T_CD4,MHCII	1272	9045	0	0.0636	0.00118	0.000762	0.85	0.000558	0.358
8	T_CD4,PD1,LAG3,TIM3,KI67	T_CD4,PD1,LAG3,TIM3	195	522	0	0.2	1	8.99e-05	23600	0.979	1
9	T_CD4,PD1,LAG3-,TIM3,KI67	T_CD4,PD1,LAG3-,TIM3	547	2415	0	0.152	0.286	0.000338	1	0.0408	1
10	T_CD4,PD1,LAG3,TIM3-,KI67	T_CD4,PD1,LAG3,TIM3-	18	46	0	0.5	4.23e-05	1.79e-09	1	0.18	1
11	T_CD4,PD1-,LAG3,TIM3,KI67	T_CD4,PD1-,LAG3,TIM3	70	395	0	0.0132	1	0.000106	1	0.00944	1
12	T_CD4,PD1,LAG3-,TIM3-,KI67	T_CD4,PD1,LAG3-,TIM3-	161	1058	0	0.1	1	0.156	1	0.265	1
13	T_CD4,PD1-,LAG3-,TIM3,KI67	T_CD4,PD1-,LAG3-,TIM3	1012	11333	0	0.0437	0.00237	0.00107	1	0.000273	0.175
14	T_CD4,PD1-,LAG3,TIM3-,KI67	T_CD4,PD1-,LAG3,TIM3-	9	88	0	0	1	6.35e-05	1	1	1
15	T_CD4,PD1-,LAG3-,TIM3-,KI67	T_CD4,PD1-,LAG3-,TIM3-	318	4024	0	0.00832	1	0.00728	1	0.00341	1
16	T_CD4,KI67	T_CD4	2330	19881	0	0.0664	0.00221	0.000853	0.395	4.29e-06	0.00275
17	T_CD4,PD1	T_CD4	4041	19881	0	0.149	0.15	0.000735	0.589	3.77e-05	0.0242
18	T_CD4,LAG3	T_CD4	1051	19881	0	0.033	0.00226	0.00135	0.00607	9.34e-09	6e-06
19	T_CD4,TIM3	T_CD4	14665	19881	0.729	0.854	0.674	0.235	1	0.162	1
20	T_CD4,CD27	T_CD4	8321	19881	0.0135	0.349	0.13	0.000949	0.282	1.54e-09	9.87e-07
21	T_CD4,ICOS	T_CD4	6392	19881	0.206	0.357	0.667	0.306	1	0.153	1
22	T_CD4,CD25	T_CD4	469	19881	0	0.00951	0.00656	0.0044	0.634	6.12e-08	3.93e-05
23	T_CD4,MHCII	T_CD4	9045	19881	0.218	0.375	0.307	0.167	0.499	5.41e-08	3.47e-05
24	T_CD4,PD1,LAG3,TIM3	T_CD4	522	19881	0	0.0137	0.00427	0.0025	0.0102	1.05e-13	6.75e-11
25	T_CD4,PD1,LAG3-,TIM3	T_CD4	2415	19881	0	0.101	0.085	0.000905	0.48	2.49e-06	0.0016
26	T_CD4,PD1,LAG3,TIM3-	T_CD4	46	19881	0	0	1	1	1	1	1
27	T_CD4,PD1-,LAG3,TIM3	T_CD4	395	19881	0	0.00683	0.675	0.00622	1	2.71e-05	0.0174
28	T_CD4,PD1,LAG3-,TIM3-	T_CD4	1058	19881	0	0.00899	0.616	0.00656	1	0.000128	0.0823
29	T_CD4,PD1-,LAG3-,TIM3	T_CD4	11333	19881	0.54	0.605	0.823	0.373	1.36	0.408	1
30	T_CD4,PD1-,LAG3,TIM3-	T_CD4	88	19881	0	0	1	1	1	1	1
31	T_CD4,PD1-,LAG3-,TIM3-	T_CD4	4024	19881	0.153	0.115	1.41	1	3.52	0.169	1
32	T_CD4	Immune_All	19881	112718	0.0541	0.136	0.378	0.229	0.595	1.75e-05	0.0113
33	T_CD4	T_All	19881	64844	0.559	0.403	1.74	1.12	2.7	0.0115	1
34	T_CD4	T_CD8	19881	36913	2.67	0.929	0.745	0.184	2.1	0.583	1
35	T_CD4	T_reg4	19881	5274	10.6	3.76	1	1.79e-09	559000000	1	1
36	T_CD8,PD1,KI67	T_CD8,PD1	4189	13992	0	0.222	0.000571	0.00019	0.956	0.00681	1
37	T_CD8,LAG3,KI67	T_CD8,LAG3	3408	8258	0	0.331	0.000212	9.78e-05	0.571	0.00393	1
38	T_CD8,TIM3,KI67	T_CD8,TIM3	7448	30612	0	0.122	0.00067	0.000377	0.0033	3.39e-06	0.00218
39	T_CD8,CD27,KI67	T_CD8,CD27	7079	24209	0	0.185	0.000733	0.000326	0.979	0.0172	1
40	T_CD8,ICOS,KI67	T_CD8,ICOS	4538	15269	0	0.251	0.000313	0.000145	0.394	0.000555	0.356
41	T_CD8,CD25,KI67	T_CD8,CD25	138	513	0	0.235	0.000212	4.23e-05	1	0.0362	1
42	T_CD8,PD1,LAG3,TIM3,KI67	T_CD8,PD1,LAG3,TIM3	2078	4985	0.342	0.391	0.944	9.29e-05	4	0.791	1
43	T_CD8,PD1,LAG3-,TIM3,KI67	T_CD8,PD1,LAG3-,TIM3	1801	7470	0	0.174	0.000736	0.000296	1.43	0.25	1
44	T_CD8,PD1,LAG3,TIM3-,KI67	T_CD8,PD1,LAG3,TIM3-	38	98	0.333	0.5	1	4.23e-05	11800	0.883	1
45	T_CD8,PD1-,LAG3,TIM3,KI67	T_CD8,PD1-,LAG3,TIM3	1264	2964	0	0.219	0.000508	7.93e-05	1	0.0281	1
46	T_CD8,PD1,LAG3-,TIM3-,KI67	T_CD8,PD1,LAG3-,TIM3-	272	1439	0.025	0.076	1	0.649	2.18	0.912	1
47	T_CD8,PD1-,LAG3-,TIM3,KI67	T_CD8,PD1-,LAG3-,TIM3	2305	15193	0	0.0723	0.0011	0.000621	0.457	5.86e-05	0.0376
48	T_CD8,PD1-,LAG3,TIM3-,KI67	T_CD8,PD1-,LAG3,TIM3-	28	211	0	0.025	1	0.000212	1	0.348	1
49	T_CD8,PD1-,LAG3-,TIM3-,KI67	T_CD8,PD1-,LAG3-,TIM3-	324	4553	0	0.0434	0.00144	0.000846	1	1.64e-05	0.0105
50	T_CD8,KI67	T_CD8	8110	36913	0	0.0997	0.000783	0.000494	0.0817	6.97e-08	4.47e-05
51	T_CD8,PD1	T_CD8	13992	36913	0	0.246	0.000561	0.000239	0.203	3.12e-06	0.00201
52	T_CD8,LAG3	T_CD8	8258	36913	0	0.156	0.000736	0.000321	0.129	7.68e-07	0.000493
53	T_CD8,TIM3	T_CD8	30612	36913	0.714	0.854	0.612	0.204	1.19	0.217	1
54	T_CD8,CD27	T_CD8	24209	36913	0	0.478	0.083	0.000136	0.275	1.58e-07	0.000101
55	T_CD8,ICOS	T_CD8	15269	36913	0	0.318	0.146	0.000248	0.5	1.3e-05	0.00832
56	T_CD8,CD25	T_CD8	513	36913	0	0.00163	1	0.0125	1	1.28e-06	0.000819
57	T_CD8,PD1,LAG3,TIM3	T_CD8	4985	36913	0	0.0476	0.00119	0.00082	0.00237	1.32e-11	8.45e-09
58	T_CD8,PD1,LAG3-,TIM3	T_CD8	7470	36913	0	0.143	0.000526	0.000355	0.157	1.23e-06	0.000791
59	T_CD8,PD1,LAG3,TIM3-	T_CD8	98	36913	0	0	1	1	1	1	1
60	T_CD8,PD1-,LAG3,TIM3	T_CD8	2964	36913	0	0.0251	0.0033	0.00171	0.00787	2.63e-08	1.69e-05
61	T_CD8,PD1,LAG3-,TIM3-	T_CD8	1439	36913	0	0.00979	1	0.00588	1	0.00188	1
62	T_CD8,PD1-,LAG3-,TIM3	T_CD8	15193	36913	0.438	0.409	1	0.481	2.63	0.839	1
63	T_CD8,PD1-,LAG3,TIM3-	T_CD8	211	36913	0	0	1	1	1	1	1
64	T_CD8,PD1-,LAG3-,TIM3-	T_CD8	4553	36913	0.2	0.0879	1.47	0.966	4.07	0.203	1
65	T_CD8	Immune_All	36913	112718	0.0133	0.167	0.135	0.0567	0.349	2.18e-06	0.0014
66	T_CD8	T_All	36913	64844	0.215	0.431	0.404	0.239	0.667	0.000284	0.182
67	T_CD8	T_reg4	36913	5274	5.98	5.63	0.296	4.23e-05	1.5	0.16	1
68	T_reg4,PD1,KI67	T_reg4,PD1	228	786	0	0.2	0.719	0.00019	1	0.104	1
69	T_reg4,LAG3,KI67	T_reg4,LAG3	160	511	0	0.23	1	9.4e-05	22100	0.804	1
70	T_reg4,TIM3,KI67	T_reg4,TIM3	967	4020	0	0.138	0.000931	0.00036	0.929	0.00188	1
71	T_reg4,CD27,KI67	T_reg4,CD27	986	3892	0	0.136	0.369	0.000529	1	0.0321	1
72	T_reg4,ICOS,KI67	T_reg4,ICOS	1133	3694	0.111	0.231	0.493	0.000973	1	0.0459	1
73	T_reg4,CD25,KI67	T_reg4,CD25	622	1754	0.115	0.2	0.83	0.1	1.17	0.298	1
74	T_reg4,MHCII,KI67	T_reg4,MHCII	611	2477	0	0.167	0.000381	0.00022	0.484	0.00092	0.591
75	T_reg4,PD1,LAG3,TIM3,KI67	T_reg4,PD1,LAG3,TIM3	26	106	0	0.129	0.000297	4.23e-05	1	0.067	1
76	T_reg4,PD1,LAG3-,TIM3,KI67	T_reg4,PD1,LAG3-,TIM3	99	417	0	0.183	0.00055	0.000127	1	0.0498	1
77	T_reg4,PD1,LAG3,TIM3-,KI67	T_reg4,PD1,LAG3,TIM3-	2	8	0.5	0	1	1.79e-09	559000000	0.624	1
78	T_reg4,PD1-,LAG3,TIM3,KI67	T_reg4,PD1-,LAG3,TIM3	127	363	0	0.17	1	4.23e-05	70900	0.944	1
79	T_reg4,PD1,LAG3-,TIM3-,KI67	T_reg4,PD1,LAG3-,TIM3-	101	255	0.367	0	9000	0.762	15800	0.231	1
80	T_reg4,PD1-,LAG3-,TIM3,KI67	T_reg4,PD1-,LAG3-,TIM3	715	3134	0	0.128	0.000529	0.000338	0.7	0.000386	0.248
81	T_reg4,PD1-,LAG3,TIM3-,KI67	T_reg4,PD1-,LAG3,TIM3-	5	34	0.5	0	11	1	559000000	0.2	1
82	T_reg4,PD1-,LAG3-,TIM3-,KI67	T_reg4,PD1-,LAG3-,TIM3-	161	957	0	0.0152	1	1	1.2	0.751	1
83	T_reg4,KI67	T_reg4	1236	5274	0	0.133	0.286	0.000698	0.991	0.00702	1
84	T_reg4,PD1	T_reg4	786	5274	0	0.0741	0.321	0.00148	1	0.0598	1
85	T_reg4,LAG3	T_reg4	511	5274	0	0.0408	0.00618	0.000994	1	2.58e-05	0.0165
86	T_reg4,TIM3	T_reg4	4020	5274	0.731	0.838	0.636	0.214	2.1	0.365	1
87	T_reg4,CD27	T_reg4	3892	5274	0.588	0.75	0.521	0.284	1	0.0426	1
88	T_reg4,ICOS	T_reg4	3694	5274	0.684	0.8	1	0.547	20	0.659	1
89	T_reg4,CD25	T_reg4	1754	5274	0.192	0.306	0.379	0.000613	0.933	0.0197	1
90	T_reg4,MHCII	T_reg4	2477	5274	0.125	0.467	0.171	0.0742	0.349	2.85e-06	0.00183
91	T_reg4,PD1,LAG3,TIM3	T_reg4	106	5274	0	0	1	1	1	1	1
92	T_reg4,PD1,LAG3-,TIM3	T_reg4	417	5274	0	0.0426	0.072	0.00148	1	0.00185	1
93	T_reg4,PD1,LAG3,TIM3-	T_reg4	8	5274	0	0	1	1	1	1	1
94	T_reg4,PD1-,LAG3,TIM3	T_reg4	363	5274	0	0.0222	0.00618	0.00152	1	2.76e-06	0.00177
95	T_reg4,PD1,LAG3-,TIM3-	T_reg4	255	5274	0	0	1	1	1	1	1
96	T_reg4,PD1-,LAG3-,TIM3	T_reg4	3134	5274	0.444	0.59	0.596	0.202	1.42	0.234	1
97	T_reg4,PD1-,LAG3,TIM3-	T_reg4	34	5274	0	0	1	1	1	1	1
98	T_reg4,PD1-,LAG3-,TIM3-	T_reg4	957	5274	0.25	0.136	1.36	0.615	3.25	0.372	1
99	T_reg4	Immune_All	5274	112718	0	0.0405	0.412	0.0622	1	0.000177	0.114
100	T_reg4	T_All	5274	64844	0.0403	0.0871	0.703	0.00199	1	0.0549	1
101	T_reg8,PD1,KI67	T_reg8,PD1	29	80	0.5	0.333	1	1.79e-09	559000000	0.882	1
102	T_reg8,LAG3,KI67	T_reg8,LAG3	34	65	0	0.5	4.23e-05	1.79e-09	1	0.243	1
103	T_reg8,TIM3,KI67	T_reg8,TIM3	107	339	0	0.222	1	7.62e-05	82700	0.822	1
104	T_reg8,CD27,KI67	T_reg8,CD27	106	328	0	0.222	1	6.35e-05	82700	0.881	1
105	T_reg8,ICOS,KI67	T_reg8,ICOS	113	320	0	0.25	0.000127	2.82e-05	1	0.0495	1
106	T_reg8,CD25,KI67	T_reg8,CD25	41	99	0	0.167	0.000212	1.06e-05	1	0.207	1
107	T_reg8,PD1,LAG3,TIM3,KI67	T_reg8,PD1,LAG3,TIM3	11	23	0	0.75
108	T_reg8,PD1,LAG3-,TIM3,KI67	T_reg8,PD1,LAG3-,TIM3	16	49	1	0.0833	559000000	1	559000000	0.213	1
109	T_reg8,PD1,LAG3,TIM3-,KI67	T_reg8,PD1,LAG3,TIM3-	0	1	0	0				1	1
110	T_reg8,PD1-,LAG3,TIM3,KI67	T_reg8,PD1-,LAG3,TIM3	22	40	0	0.5	4.23e-05	1.79e-09	1	0.31	1
111	T_reg8,PD1,LAG3-,TIM3-,KI67	T_reg8,PD1,LAG3-,TIM3-	2	7	0	0	1	1.79e-09	1	1	1
112	T_reg8,PD1-,LAG3-,TIM3,KI67	T_reg8,PD1-,LAG3-,TIM3	58	227	0	0	1	1.79e-09	1	1	1
113	T_reg8,PD1-,LAG3,TIM3-,KI67	T_reg8,PD1-,LAG3,TIM3-	1	1	0	1
114	T_reg8,PD1-,LAG3-,TIM3-,KI67	T_reg8,PD1-,LAG3-,TIM3-	15	78	0	0	1	4.23e-05	1	1	1
115	T_reg8,KI67	T_reg8	125	426	0	0.2	1	0.000127	1	0.204	1
116	T_reg8,PD1	T_reg8	80	426	0	0.1	1	0.000169	33100	0.673	1
117	T_reg8,LAG3	T_reg8	65	426	0	0	1	0.000296	1	1	1
118	T_reg8,TIM3	T_reg8	339	426	0.5	0.882	1	6.04e-06	2950	0.576	1
119	T_reg8,CD27	T_reg8	328	426	0.5	0.75	1	1.41e-05	7880	0.951	1
120	T_reg8,ICOS	T_reg8	320	426	0.5	0.784	1	1.21e-05	6300	0.83	1
121	T_reg8,CD25	T_reg8	99	426	0	0.131	1	0.000127	47300	0.73	1
122	T_reg8,PD1,LAG3,TIM3	T_reg8	23	426	0	0	1	0.00161	1	1	1
123	T_reg8,PD1,LAG3-,TIM3	T_reg8	49	426	0	0	1	0.000296	1	1	1
124	T_reg8,PD1,LAG3,TIM3-	T_reg8	1	426	0	0	1	1	1	1	1
125	T_reg8,PD1-,LAG3,TIM3	T_reg8	40	426	0	0	1	1	1	1	1
126	T_reg8,PD1,LAG3-,TIM3-	T_reg8	7	426	0	0	1	1	1	1	1
127	T_reg8,PD1-,LAG3-,TIM3	T_reg8	227	426	0	0.518	4.23e-05	2.12e-05	1	0.0376	1
128	T_reg8,PD1-,LAG3,TIM3-	T_reg8	1	426	0	0	1	1	1	1	1
129	T_reg8,PD1-,LAG3-,TIM3-	T_reg8	78	426	0	0.101	1	0.000169	47300	0.71	1
130	T_reg8	Immune_All	426	112718	0	0	1	0.0457	1	1	1
131	T_reg8	T_All	426	64844	0	0.00229	0.0253	0.0139	1	2.41e-11	1.55e-08
132	T_regDN,PD1,KI67	T_regDN,PD1	0	2	0	0				1	1
133	T_regDN,LAG3,KI67	T_regDN,LAG3	3	5	0	0.75
134	T_regDN,TIM3,KI67	T_regDN,TIM3	23	72	0	0.268
135	T_regDN,CD27,KI67	T_regDN,CD27	20	66	0	0.25
136	T_regDN,ICOS,KI67	T_regDN,ICOS	24	60	1	0.4	35500	1	559000000	0.2	1
137	T_regDN,CD25,KI67	T_regDN,CD25	8	19	1	0.25	559000000	1	559000000	0.261	1
138	T_regDN,KI67	T_regDN	27	96	1	0.174	122000	1	559000000	0.0947	1
139	T_regDN,PD1	T_regDN	2	96	0	0	1	1	1	1	1
140	T_regDN,LAG3	T_regDN	5	96	0	0	1	1	1	1	1
141	T_regDN,TIM3	T_regDN	72	96	0	1
142	T_regDN,CD27	T_regDN	66	96	0	0.826	1.12e-05	1.79e-09	1	0.206	1
143	T_regDN,ICOS	T_regDN	60	96	1	0.625	14200	1	559000000	0.223	1
144	T_regDN,CD25	T_regDN	19	96	1	0
145	T_regDN	Immune_All	96	112718	0	0	1	1	1	1	1
146	T_regDN	T_All	96	64844	0	0	1	1	1	1	1
147	T_CD4/CD8,PD1,KI67	T_CD4/CD8,PD1	73	413	0	0.0227	1	0.000212	1	0.147	1
148	T_CD4/CD8,LAG3,KI67	T_CD4/CD8,LAG3	36	118	0	0.333	8.46e-05	1.79e-09	1	0.311	1
149	T_CD4/CD8,TIM3,KI67	T_CD4/CD8,TIM3	132	970	0	0	1	0.000303	1	1	1
150	T_CD4/CD8,CD27,KI67	T_CD4/CD8,CD27	113	772	0	0	1	0.000719	6	1	1
151	T_CD4/CD8,ICOS,KI67	T_CD4/CD8,ICOS	91	545	0	0.0625	1	0.000212	1	0.212	1
152	T_CD4/CD8,CD25,KI67	T_CD4/CD8,CD25	1	30	0	0				1	1
153	T_CD4/CD8,KI67	T_CD4/CD8	146	1124	0	0.0569	1	0.000389	1	0.0222	1
154	T_CD4/CD8,PD1	T_CD4/CD8	413	1124	0.5	0.333	1	0.333	5.33	0.615	1
155	T_CD4/CD8,LAG3	T_CD4/CD8	118	1124	0	0	1	0.000508	1	1	1
156	T_CD4/CD8,TIM3	T_CD4/CD8	970	1124	1	0.964	1	0.0147	1	0.317	1
157	T_CD4/CD8,CD27	T_CD4/CD8	772	1124	0	0.667	0.000127	3.17e-05	0.231	3.93e-05	0.0253
158	T_CD4/CD8,ICOS	T_CD4/CD8	545	1124	0.167	0.492	0.273	7.62e-05	1	0.0119	1
159	T_CD4/CD8,CD25	T_CD4/CD8	30	1124	0	0	1	1	1	1	1
160	T_CD4/CD8	Immune_All	1124	112718	0	0.00453	0.0155	0.00969	0.571	2.41e-11	1.55e-08
161	T_CD4/CD8	T_All	1124	64844	0	0.0111	0.00565	0.00415	0.0114	3.64e-10	2.34e-07
162	T_null,PD1,KI67	T_null,PD1	46	147	0	0.225	1	7.86e-05	1	0.5	1
163	T_null,LAG3,KI67	T_null,LAG3	19	61	0	0	1	4.23e-05	11800	1	1
164	T_null,TIM3,KI67	T_null,TIM3	108	774	0	0.0943	0.000846	0.000275	1	0.00821	1
165	T_null,CD27,KI67	T_null,CD27	79	392	0	0.125	1	0.000212	1	0.218	1
166	T_null,ICOS,KI67	T_null,ICOS	54	189	0	0.183	1	8.46e-05	1	0.252	1
167	T_null,CD25,KI67	T_null,CD25	0	84	0	0				1	1
168	T_null,KI67	T_null	142	1130	0	0.0556	1	0.000719	1	0.0273	1
169	T_null,PD1	T_null	147	1130	0	0.0551	1	0.000592	1	0.0265	1
170	T_null,LAG3	T_null	61	1130	0	0	1	1	1	1	1
171	T_null,TIM3	T_null	774	1130	0.333	0.709	1	0.0769	2.25	0.418	1
172	T_null,CD27	T_null	392	1130	0	0.4	0.531	9.67e-05	1	0.0461	1
173	T_null,ICOS	T_null	189	1130	0	0.125	0.000592	0.000254	1	0.0029	1
174	T_null,CD25	T_null	84	1130	0	0	1	1	1	1	1
175	T_null	Immune_All	1130	112718	0	0.00615	0.753	0.0538	1	0.000247	0.158
176	T_null	T_All	1130	64844	0	0.0126	0.827	0.00605	1	0.0288	1
177	T_All,PD1,KI67	T_All,PD1	5486	19461	0	0.217	0.12	0.000338	0.771	0.00178	1
178	T_All,LAG3,KI67	T_All,LAG3	3952	10069	0	0.28	0.000279	0.000135	0.222	0.000414	0.266
179	T_All,TIM3,KI67	T_All,TIM3	10609	51452	0	0.106	0.148	0.000685	0.467	1.16e-05	0.00745
180	T_All,CD27,KI67	T_All,CD27	9583	37980	0	0.151	0.172	0.000448	0.714	0.00178	1
181	T_All,ICOS,KI67	T_All,ICOS	7623	26469	0.0713	0.2	0.39	0.093	0.905	0.00545	1
182	T_All,CD25,KI67	T_All,CD25	895	2968	0	0.185	0.161	0.000339	1	0.00574	1
183	T_All,KI67	T_All	12116	64844	0.0238	0.104	0.191	0.00111	0.471	2.8e-06	0.00179
184	T_All,PD1	T_All	19461	64844	0.0484	0.188	0.213	0.044	0.542	5.17e-06	0.00332
185	T_All,LAG3	T_All	10069	64844	0	0.0923	0.0037	0.000908	0.229	6.1e-09	3.91e-06
186	T_All,TIM3	T_All	51452	64844	0.739	0.868	0.506	0.219	1	0.0331	1
187	T_All,CD27	T_All	37980	64844	0.138	0.444	0.219	0.116	0.394	1.24e-07	7.94e-05
188	T_All,ICOS	T_All	26469	64844	0.239	0.436	0.546	0.32	0.946	0.00759	1
189	T_All,CD25	T_All	2968	64844	0	0.0372	0.321	0.00256	1	0.014	1
190	T_All	Immune_All	64844	112718	0.134	0.559	0.208	0.123	0.345	1e-07	6.42e-05
191	B_All,PD1,KI67	B_All,PD1	14	68	0	0	1	4.23e-05	1	1	1
192	B_All,LAG3,KI67	B_All,LAG3	3	14	0	0	1	1.79e-09	1	1	1
193	B_All,TIM3,KI67	B_All,TIM3	79	785	0	0	1	0.00133	1	1	1
194	B_All,CD27,KI67	B_All,CD27	25	330	0	0	1	0.000296	1	1	1
195	B_All,ICOS,KI67	B_All,ICOS	6	49	0	0	1	8.46e-05	1	1	1
196	B_All,CD25,KI67	B_All,CD25	13	154	0	0.0476	0.000846	1.79e-09	1	0.0621	1
197	B_All,PD1,LAG3,TIM3,KI67	B_All,PD1,LAG3,TIM3	1	1	0	1
198	B_All,PD1,LAG3-,TIM3,KI67	B_All,PD1,LAG3-,TIM3	1	13	0	0				1	1
199	B_All,PD1,LAG3,TIM3-,KI67	B_All,PD1,LAG3,TIM3-	0	1	0	0				1	1
200	B_All,PD1-,LAG3,TIM3,KI67	B_All,PD1-,LAG3,TIM3	2	8	0	0	1	1.79e-09	1	1	1
201	B_All,PD1,LAG3-,TIM3-,KI67	B_All,PD1,LAG3-,TIM3-	12	53	0	0.125	1	1.79e-09	1	0.212	1
202	B_All,PD1-,LAG3-,TIM3,KI67	B_All,PD1-,LAG3-,TIM3	75	763	0	0	1	1	1	1	1
203	B_All,PD1-,LAG3,TIM3-,KI67	B_All,PD1-,LAG3,TIM3-	0	4	0	0				1	1
204	B_All,PD1-,LAG3-,TIM3-,KI67	B_All,PD1-,LAG3-,TIM3-	64	918	0	0	1	1	1	1	1
205	B_All,KI67	B_All	155	1761	0	0.0417	0.00313	0.000709	1	0.000286	0.183
206	B_All,PD1	B_All	68	1761	0	0	1	1	1	1	1
207	B_All,LAG3	B_All	14	1761	0	0	1	1	1	1	1
208	B_All,TIM3	B_All	785	1761	0	0.612	0.00124	4.23e-05	1	0.00906	1
209	B_All,CD27	B_All	330	1761	0	0.105	0.5	0.000349	1	0.00251	1
210	B_All,ICOS	B_All	49	1761	0	0	1	1	1	1	1
211	B_All,CD25	B_All	154	1761	0	0	1	1	1	1	1
212	B_All,PD1,LAG3,TIM3	B_All	1	1761	0	0	1	1	1	1	1
213	B_All,PD1,LAG3-,TIM3	B_All	13	1761	0	0	1	1	1	1	1
214	B_All,PD1,LAG3,TIM3-	B_All	1	1761	0	0	1	1	1	1	1
215	B_All,PD1-,LAG3,TIM3	B_All	8	1761	0	0	1	1	1	1	1
216	B_All,PD1,LAG3-,TIM3-	B_All	53	1761	0	0	1	1	1	1	1
217	B_All,PD1-,LAG3-,TIM3	B_All	763	1761	0	0.588	0.000973	4.76e-05	0.667	0.00257	1
218	B_All,PD1-,LAG3,TIM3-	B_All	4	1761	0	0	1	1	1	1	1
219	B_All,PD1-,LAG3-,TIM3-	B_All	918	1761	0.675	0.375	2	0.75	1550	0.247	1
220	B	Immune_All	1761	112718	0	0.00613	0.943	0.12	1	0.00411	1
221	NK,PD1,KI67	NK,PD1	10	131	0	0	1	1	1580	1	1
222	NK,LAG3,KI67	NK,LAG3	10	193	0	0	1	1	1	1	1
223	NK,TIM3,KI67	NK,TIM3	398	3460	0	0.0571	1	0.39	1	0.0366	1
224	NK,CD27,KI67	NK,CD27	32	174	0	0	1	0.000127	1	1	1
225	NK,ICOS,KI67	NK,ICOS	16	73	0	0	1	1	1	1	1
226	NK,CD25,KI67	NK,CD25	71	884	0	0	1	1	422	1	1
227	NK,KI67	NK	459	5015	0	0.0417	1	0.6	1	0.0755	1
228	NK,PD1	NK	131	5015	0	0	1	1	1	1	1
229	NK,LAG3	NK	193	5015	0	0	1	1	1	1	1
230	NK,TIM3	NK	3460	5015	0.636	0.847	0.478	0.193	1	0.0346	1
231	NK,CD27	NK	174	5015	0	0	1	0.674	1	1	1
232	NK,ICOS	NK	73	5015	0	0	1	1	1	1	1
233	NK,CD25	NK	884	5015	0	0	1	1	1	1	1
234	NK	Immune_All	5015	112718	0.0624	0.0248	2.43	1.19	4.47	0.00272	1
235	NK	NK_All	5015	6273	1	0.75	945	14	4170	1.6e-12	1.03e-09
236	NKT,PD1,KI67	NKT,PD1	5	19	0	0				1	1
237	NKT,LAG3,KI67	NKT,LAG3	3	15	0	0				1	1
238	NKT,TIM3,KI67	NKT,TIM3	25	220	0	0	1	1	1	1	1
239	NKT,CD27,KI67	NKT,CD27	10	79	0	0				1	1
240	NKT,ICOS,KI67	NKT,ICOS	13	49	0	0				1	1
241	NKT,CD25,KI67	NKT,CD25	3	29	0.5	0	1	1.79e-09	559000000	0.519	1
242	NKT,KI67	NKT	30	262	0	0	1	0.000508	1	1	1
243	NKT,PD1	NKT	19	262	0	0	1	1	1	1	1
244	NKT,LAG3	NKT	15	262	0	0	1	1	1	1	1
245	NKT,TIM3	NKT	220	262	1	1	1	1	1580	0.533	1
246	NKT,CD27	NKT	79	262	0	0.113	0.000296	4.23e-05	1	0.0214	1
247	NKT,ICOS	NKT	49	262	0	0	1	9.87e-05	1	1	1
248	NKT,CD25	NKT	29	262	0	0	1	1	1	1	1
249	NKT	Immune_All	262	112718	0	0	1	1	1	1	1
250	NKT	NK_All	262	6273	0	0.0103	1	0.00186	1	2.25e-08	1.44e-05
251	NKT_CD4,PD1,KI67	NKT_CD4,PD1	14	84	0	0	1	0.000212	1	1	1
252	NKT_CD4,LAG3,KI67	NKT_CD4,LAG3	2	24	0	0	1	0.000148	1	1	1
253	NKT_CD4,TIM3,KI67	NKT_CD4,TIM3	31	319	0	0	1	1	1	1	1
254	NKT_CD4,CD27,KI67	NKT_CD4,CD27	11	122	0	0	1	1	1	1	1
255	NKT_CD4,ICOS,KI67	NKT_CD4,ICOS	18	103	0	0	1	1	1	1	1
256	NKT_CD4,CD25,KI67	NKT_CD4,CD25	2	32	0	0	1	1	1	1	1
257	NKT_CD4,KI67	NKT_CD4	32	353	0	0	1	1	1	1	1
258	NKT_CD4,PD1	NKT_CD4	84	353	0	0	1	0.000402	1	1	1
259	NKT_CD4,LAG3	NKT_CD4	24	353	0	0	1	1	1	1	1
260	NKT_CD4,TIM3	NKT_CD4	319	353	1	1	1	1	1	0.0475	1
261	NKT_CD4,CD27	NKT_CD4	122	353	0	0.25	0.000381	4.23e-05	1	0.00118	0.756
262	NKT_CD4,ICOS	NKT_CD4	103	353	0.167	0.2	1	0.85	3	0.841	1
263	NKT_CD4,CD25	NKT_CD4	32	353	0	0	1	1	1	1	1
264	NKT_CD4	Immune_All	353	112718	0	0.000609	1	0.243	1	0.000594	0.382
265	NKT_CD4	NK_All	353	6273	0	0.0357	0.366	0.00381	1	4.82e-05	0.0309
266	NKT_CD8,PD1,KI67	NKT_CD8,PD1	90	257	0.167	0.299	1	9.31e-05	4730	0.837	1
267	NKT_CD8,LAG3,KI67	NKT_CD8,LAG3	67	135	0.5	0.45	1	4.23e-05	35500	0.764	1
268	NKT_CD8,TIM3,KI67	NKT_CD8,TIM3	157	601	0.417	0.2	2.33	1	23600	0.0726	1
269	NKT_CD8,CD27,KI67	NKT_CD8,CD27	139	444	0.5	0.282	1	0.000122	9.9	0.642	1
270	NKT_CD8,ICOS,KI67	NKT_CD8,ICOS	76	238	0.667	0.333	1	8.46e-05	47300	0.866	1
271	NKT_CD8,CD25,KI67	NKT_CD8,CD25	2	15	0.5	0	1	1.79e-09	559000000	0.419	1
272	NKT_CD8,KI67	NKT_CD8	161	643	0.333	0	1.78	1	23600	0.109	1
273	NKT_CD8,PD1	NKT_CD8	257	643	0	0.269	1	0.000127	2.5	0.754	1
274	NKT_CD8,LAG3	NKT_CD8	135	643	0	0	1	0.000423	1	1	1
275	NKT_CD8,TIM3	NKT_CD8	601	643	1	1	1	0.667	1	0.29	1
276	NKT_CD8,CD27	NKT_CD8	444	643	0	0.5	0.233	4.23e-05	1	0.0393	1
277	NKT_CD8,ICOS	NKT_CD8	238	643	0	0.143	1	0.000254	1	0.382	1
278	NKT_CD8,CD25	NKT_CD8	15	643	0	0	1	1	1	1	1
279	NKT_CD8	Immune_All	643	112718	0	0.00113	1	0.0363	1	4.21e-08	2.7e-05
280	NKT_CD8	NK_All	643	6273	0	0.0348	0.00203	0.00121	0.826	4.58e-09	2.94e-06
281	NK_All,PD1,KI67	NK_All,PD1	119	491	0	0.167	0.46	0.000169	1	0.0769	1
282	NK_All,LAG3,KI67	NK_All,LAG3	82	367	0	0	1	8.46e-05	1	1	1
283	NK_All,TIM3,KI67	NK_All,TIM3	611	4600	0	0.106	0.837	0.232	1	0.00759	1
284	NK_All,CD27,KI67	NK_All,CD27	192	819	0	0.143	0.000635	0.000161	1	0.0201	1
285	NK_All,ICOS,KI67	NK_All,ICOS	123	463	0	0.23	1	0.000127	1	0.17	1
286	NK_All,CD25,KI67	NK_All,CD25	78	960	0	0	1	1	1	1	1
287	NK_All,PD1,LAG3,TIM3,KI67	NK_All,PD1,LAG3,TIM3	47	93	0	0.5	4.23e-05	1.79e-09	1	0.283	1
288	NK_All,PD1,LAG3-,TIM3,KI67	NK_All,PD1,LAG3-,TIM3	63	271	0.0714	0.158	1	0.000338	2.33	0.774	1
289	NK_All,PD1,LAG3,TIM3-,KI67	NK_All,PD1,LAG3,TIM3-	0	1	0	0				1	1
290	NK_All,PD1-,LAG3,TIM3,KI67	NK_All,PD1-,LAG3,TIM3	31	213	0	0	1	0.0566	1	1	1
291	NK_All,PD1,LAG3-,TIM3-,KI67	NK_All,PD1,LAG3-,TIM3-	9	126	0	0	1	1	1	1	1
292	NK_All,PD1-,LAG3-,TIM3,KI67	NK_All,PD1-,LAG3-,TIM3	470	4023	0	0.0667	1	0.4	1	0.0434	1
293	NK_All,PD1-,LAG3,TIM3-,KI67	NK_All,PD1-,LAG3,TIM3-	4	60	0	0	1	1	2950	1	1
294	NK_All,PD1-,LAG3-,TIM3-,KI67	NK_All,PD1-,LAG3-,TIM3-	58	1486	0	0	1	1	1	1	1
295	NK_All,KI67	NK_All	682	6273	0	0.0742	0.938	0.354	1	0.01	1
296	NK_All,PD1	NK_All	491	6273	0	0.0213	1	0.00182	1	2.25e-06	0.00144
297	NK_All,LAG3	NK_All	367	6273	0	0	1	0.25	1	1	1
298	NK_All,TIM3	NK_All	4600	6273	0.648	0.872	0.426	0.17	1	0.0203	1
299	NK_All,CD27	NK_All	819	6273	0	0.0555	0.117	0.000994	1	2.95e-08	1.89e-05
300	NK_All,ICOS	NK_All	463	6273	0	0.0452	0.499	0.016	1	6.23e-06	0.004
301	NK_All,CD25	NK_All	960	6273	0	0	1	1	1	1	1
302	NK_All,PD1,LAG3,TIM3	NK_All	93	6273	0	0	1	1	1	1	1
303	NK_All,PD1,LAG3-,TIM3	NK_All	271	6273	0	0	1	0.00393	1	1	1
304	NK_All,PD1,LAG3,TIM3-	NK_All	1	6273	0	0	1	1	1	1	1
305	NK_All,PD1-,LAG3,TIM3	NK_All	213	6273	0	0	1	1	1	1	1
306	NK_All,PD1,LAG3-,TIM3-	NK_All	126	6273	0	0	1	1	1	1	1
307	NK_All,PD1-,LAG3-,TIM3	NK_All	4023	6273	0.62	0.75	0.737	0.375	1.27	0.26	1
308	NK_All,PD1-,LAG3,TIM3-	NK_All	60	6273	0	0	1	1	1	1	1
309	NK_All,PD1-,LAG3-,TIM3-	NK_All	1486	6273	0.333	0.121	2.6	1.16	6.08	0.00361	1
310	NK_All	Immune_All	6273	112718	0.066	0.036	1.84	1	3.4	0.0218	1
311	Macrophage_MHCII+,TIM3,KI67	Macrophage_MHCII+,TIM3	816	12242	0.0755	0.0482	1	0.938	1.64	0.398	1
312	Macrophage_MHCII+,CD25,KI67	Macrophage_MHCII+,CD25	25	408	0.0111	0	1	1	537	0.104	1
313	Macrophage_MHCII+,PDL1,KI67	Macrophage_MHCII+,PDL1	94	1625	0	0.00714	1	0.00152	7.5	0.805	1
314	Macrophage_MHCII+,B7H3,KI67	Macrophage_MHCII+,B7H3	769	11497	0.0792	0.0551	1	0.942	1.64	0.427	1
315	Macrophage_MHCII+,IDO1,KI67	Macrophage_MHCII+,IDO1	15	216	0	0	1	1	1	1	1
316	Macrophage_MHCII+,PDL1,B7H3,IDO1,KI67	Macrophage_MHCII+,PDL1,B7H3,IDO1	0	27	0	0				1	1
317	Macrophage_MHCII+,PDL1,B7H3,IDO1-,KI67	Macrophage_MHCII+,PDL1,B7H3,IDO1-	94	1579	0	0.0143	1	0.00136	8.18	0.843	1
318	Macrophage_MHCII+,PDL1,B7H3-,IDO1,KI67	Macrophage_MHCII+,PDL1,B7H3-,IDO1	0	0	0	0				1	1
319	Macrophage_MHCII+,PDL1-,B7H3,IDO1,KI67	Macrophage_MHCII+,PDL1-,B7H3,IDO1	12	147	0	0	1	0.000423	1	1	1
320	Macrophage_MHCII+,PDL1,B7H3-,IDO1-,KI67	Macrophage_MHCII+,PDL1,B7H3-,IDO1-	0	19	0	0				1	1
321	Macrophage_MHCII+,PDL1-,B7H3,IDO1-,KI67	Macrophage_MHCII+,PDL1-,B7H3,IDO1-	663	9744	0.0792	0.0524	1	0.928	1.57	0.496	1
322	Macrophage_MHCII+,PDL1-,B7H3-,IDO1,KI67	Macrophage_MHCII+,PDL1-,B7H3-,IDO1	3	42	0	0	1	1	559000000	1	1
323	Macrophage_MHCII+,PDL1-,B7H3-,IDO1-,KI67	Macrophage_MHCII+,PDL1-,B7H3-,IDO1-	88	1706	0	0	1	1	1	1	1
324	Macrophage_MHCII+,KI67	Macrophage_MHCII+	860	13264	0.0741	0.0497	1	0.929	1.6	0.429	1
325	Macrophage_MHCII+,TIM3	Macrophage_MHCII+	12242	13264	0.989	0.975	1	1	2.87	0.253	1
326	Macrophage_MHCII+,CD25	Macrophage_MHCII+	408	13264	0	0	1	1	1	1	1
327	Macrophage_MHCII+,PDL1	Macrophage_MHCII+	1625	13264	0	0	1	1	1	1	1
328	Macrophage_MHCII+,B7H3	Macrophage_MHCII+	11497	13264	0.939	0.923	1	0.754	1.61	0.893	1
329	Macrophage_MHCII+,IDO1	Macrophage_MHCII+	216	13264	0	0	1	1	1	1	1
330	Macrophage_MHCII+,MRC1	Macrophage_MHCII+	3047	13264	0.198	0.25	0.828	0.402	1.5	0.465	1
331	Macrophage_MHCII+,TGM2	Macrophage_MHCII+	196	13264	0	0	1	1	1	1	1
332	Macrophage_MHCII+,PDL1,B7H3,IDO1	Macrophage_MHCII+	27	13264	0	0	1	1	1	1	1
333	Macrophage_MHCII+,PDL1,B7H3,IDO1-	Macrophage_MHCII+	1579	13264	0	0	1	1	1	1	1
334	Macrophage_MHCII+,PDL1,B7H3-,IDO1	Macrophage_MHCII+	0	13264	0	0				1	1
335	Macrophage_MHCII+,PDL1-,B7H3,IDO1	Macrophage_MHCII+	147	13264	0	0	1	1	1	1	1
336	Macrophage_MHCII+,PDL1,B7H3-,IDO1-	Macrophage_MHCII+	19	13264	0	0	1	1	1	1	1
337	Macrophage_MHCII+,PDL1-,B7H3,IDO1-	Macrophage_MHCII+	9744	13264	0.908	0.8	1.45	1	3.47	0.123	1
338	Macrophage_MHCII+,PDL1-,B7H3-,IDO1	Macrophage_MHCII+	42	13264	0	0	1	1	1	1	1
339	Macrophage_MHCII+,PDL1-,B7H3-,IDO1-	Macrophage_MHCII+	1706	13264	0.0607	0.0741	1	0.705	1.26	0.918	1
340	Macrophage_MHCII+	Immune_All	13264	112718	0.133	0.0993	1.05	0.682	1.67	0.743	1
341	Macrophage_MHCII+	Macrophage_All	13264	30577	0.306	0.455	0.48	0.31	0.74	0.000332	0.213
342	Macrophage_MHCII+	Macrophage_MHCII-	13264	7868	1.38	3.17	0.437	0.0466	1.5	0.222	1
343	Macrophage_MHCII+	T_All	13264	64844	0.76	0.188	1.24	0.436	2.99	0.632	1
344	Macrophage_MHCII-,TIM3,KI67	Macrophage_MHCII-,TIM3	342	3893	0.0658	0.0445	1	1	1.51	0.385	1
345	Macrophage_MHCII-,CD25,KI67	Macrophage_MHCII-,CD25	32	610	0	0	1	0.0565	1	1	1
346	Macrophage_MHCII-,PDL1,KI67	Macrophage_MHCII-,PDL1	19	438	0	0	1	1	1	1	1
347	Macrophage_MHCII-,B7H3,KI67	Macrophage_MHCII-,B7H3	665	6110	0.0667	0.0435	1	1	1.67	0.336	1
348	Macrophage_MHCII-,IDO1,KI67	Macrophage_MHCII-,IDO1	5	151	0	0	1	1	1	1	1
349	Macrophage_MHCII-,PDL1,B7H3,IDO1,KI67	Macrophage_MHCII-,PDL1,B7H3,IDO1	0	7	0	0				1	1
350	Macrophage_MHCII-,PDL1,B7H3,IDO1-,KI67	Macrophage_MHCII-,PDL1,B7H3,IDO1-	18	351	0	0	1	1	1	1	1
351	Macrophage_MHCII-,PDL1,B7H3-,IDO1,KI67	Macrophage_MHCII-,PDL1,B7H3-,IDO1	0	4	0	0				1	1
352	Macrophage_MHCII-,PDL1-,B7H3,IDO1,KI67	Macrophage_MHCII-,PDL1-,B7H3,IDO1	5	111	0	0	1	1	1	1	1
353	Macrophage_MHCII-,PDL1,B7H3-,IDO1-,KI67	Macrophage_MHCII-,PDL1,B7H3-,IDO1-	1	76	0	0	1	1	1	1	1
354	Macrophage_MHCII-,PDL1-,B7H3,IDO1-,KI67	Macrophage_MHCII-,PDL1-,B7H3,IDO1-	642	5641	0.0667	0.0435	1	1	1.8	0.2	1
355	Macrophage_MHCII-,PDL1-,B7H3-,IDO1,KI67	Macrophage_MHCII-,PDL1-,B7H3-,IDO1	0	29	0	0				1	1
356	Macrophage_MHCII-,PDL1-,B7H3-,IDO1-,KI67	Macrophage_MHCII-,PDL1-,B7H3-,IDO1-	162	1649	0	0	1	1	1	1	1
357	Macrophage_MHCII-,KI67	Macrophage_MHCII-	828	7868	0.0714	0.0498	1	1	1.55	0.48	1
358	Macrophage_MHCII-,TIM3	Macrophage_MHCII-	3893	7868	0.846	0.864	1	0.389	1	0.413	1
359	Macrophage_MHCII-,CD25	Macrophage_MHCII-	610	7868	0	0	1	1	1	1	1
360	Macrophage_MHCII-,PDL1	Macrophage_MHCII-	438	7868	0	0	1	1	1	1	1
361	Macrophage_MHCII-,B7H3	Macrophage_MHCII-	6110	7868	0.783	0.89	0.54	0.2	1	0.0198	1
362	Macrophage_MHCII-,IDO1	Macrophage_MHCII-	151	7868	0	0	1	1	1	1	1
363	Macrophage_MHCII-,MRC1	Macrophage_MHCII-	1062	7868	0.0357	0.0846	1	0.75	1.45	0.959	1
364	Macrophage_MHCII-,TGM2	Macrophage_MHCII-	633	7868	0	0	1	1	1	1	1
365	Macrophage_MHCII-,PDL1,B7H3,IDO1	Macrophage_MHCII-	7	7868	0	0	1	1	1	1	1
366	Macrophage_MHCII-,PDL1,B7H3,IDO1-	Macrophage_MHCII-	351	7868	0	0	1	1	1	1	1
367	Macrophage_MHCII-,PDL1,B7H3-,IDO1	Macrophage_MHCII-	4	7868	0	0	1	1	1	1	1
368	Macrophage_MHCII-,PDL1-,B7H3,IDO1	Macrophage_MHCII-	111	7868	0	0	1	1	1	1	1
369	Macrophage_MHCII-,PDL1,B7H3-,IDO1-	Macrophage_MHCII-	76	7868	0	0	1	1	1	1	1
370	Macrophage_MHCII-,PDL1-,B7H3,IDO1-	Macrophage_MHCII-	5641	7868	0.754	0.8	0.862	0.404	1.15	0.323	1
371	Macrophage_MHCII-,PDL1-,B7H3-,IDO1	Macrophage_MHCII-	29	7868	0	0	1	1	1	1	1
372	Macrophage_MHCII-,PDL1-,B7H3-,IDO1-	Macrophage_MHCII-	1649	7868	0.159	0.0923	1.82	1	5.42	0.0215	1
373	Macrophage_MHCII-	Immune_All	7868	112718	0.123	0.0283	2.75	1.59	4.75	0.000209	0.134
374	Macrophage_MHCII-	Macrophage_All	7868	30577	0.24	0.144	1.95	1.3	2.96	0.000995	0.639
375	Macrophage_MHCII-	T_All	7868	64844	0.658	0.0642	4.09	1.55	8.85	0.00694	1
376	Macrophage_Other,TIM3,KI67	Macrophage_Other,TIM3	685	7153	0.0635	0.0725	1	0.72	1.24	0.844	1
377	Macrophage_Other,CD25,KI67	Macrophage_Other,KI67	19	813	0	0	1	1	1	1	1
378	Macrophage_Other,PDL1,KI67	Macrophage_Other,PDL1	25	384	0.0909	0	1	1	5250	0.108	1
379	Macrophage_Other,B7H3,KI67	Macrophage_Other,B7H3	722	7874	0.0667	0.0703	1	0.763	1.19	0.897	1
380	Macrophage_Other,IDO1,KI67	Macrophage_Other,IDO1	20	225	0	0	1	1	1	1	1
381	Macrophage_Other,PDL1,B7H3,IDO1,KI67	Macrophage_Other,PDL1,B7H3,IDO1	3	24	0.5	0	103	1	559000000	0.186	1
382	Macrophage_Other,PDL1,B7H3,IDO1-,KI67	Macrophage_Other,PDL1,B7H3,IDO1-	22	345	0	0	1	1	23600	1	1
383	Macrophage_Other,PDL1,B7H3-,IDO1,KI67	Macrophage_Other,PDL1,B7H3-,IDO1	0	1	0	0				1	1
384	Macrophage_Other,PDL1-,B7H3,IDO1,KI67	Macrophage_Other,PDL1-,B7H3,IDO1	13	162	0	0	1	1	1	1	1
385	Macrophage_Other,PDL1,B7H3-,IDO1-,KI67	Macrophage_Other,PDL1,B7H3-,IDO1-	0	14	0	0				1	1
386	Macrophage_Other,PDL1-,B7H3,IDO1-,KI67	Macrophage_Other,PDL1-,B7H3,IDO1-	684	7343	0.0667	0.06	1	0.812	1.2	0.99	1
387	Macrophage_Other,PDL1-,B7H3-,IDO1,KI67	Macrophage_Other,PDL1-,B7H3-,IDO1	4	38	0	0	1	6.35e-05	1	1	1
388	Macrophage_Other,PDL1-,B7H3-,IDO1-,KI67	Macrophage_Other,PDL1-,B7H3-,IDO1-	87	1518	0	0	1	1	1	1	1
389	Macrophage_Other,KI67	Macrophage_Other	813	9445	0.0621	0.0625	1	0.697	1.19	0.718	1
390	Macrophage_Other,TIM3	Macrophage_Other	7153	9445	0.847	0.918	0.722	0.314	1.15	0.246	1
391	Macrophage_Other,CD25	Macrophage_Other	442	9445	0	0	1	1	1	1	1
392	Macrophage_Other,PDL1	Macrophage_Other	384	9445	0	0	1	1	1	1	1
393	Macrophage_Other,B7H3	Macrophage_Other	7874	9445	0.879	0.917	1	0.502	1.33	0.6	1
394	Macrophage_Other,IDO1	Macrophage_Other	225	9445	0	0	1	1	1	1	1
395	Macrophage_Other,MRC1	Macrophage_Other	1225	9445	0.0312	0.075	0.836	0.337	1	0.0791	1
396	Macrophage_Other,TGM2	Macrophage_Other	400	9445	0	0.017	1	0.538	1	0.0776	1
397	Macrophage_Other,PDL1,B7H3,IDO1	Macrophage_Other	24	9445	0	0	1	1	1	1	1
398	Macrophage_Other,PDL1,B7H3,IDO1-	Macrophage_Other	345	9445	0	0	1	1	1	1	1
399	Macrophage_Other,PDL1,B7H3-,IDO1	Macrophage_Other	1	9445	0	0	1	1	1	1	1
400	Macrophage_Other,PDL1-,B7H3,IDO1	Macrophage_Other	162	9445	0	0	1	1	1	1	1
401	Macrophage_Other,PDL1,B7H3-,IDO1-	Macrophage_Other	14	9445	0	0	1	1	1	1	1
402	Macrophage_Other,PDL1-,B7H3,IDO1-	Macrophage_Other	7343	9445	0.857	0.814	1.27	0.875	2.33	0.25	1
403	Macrophage_Other,PDL1-,B7H3-,IDO1	Macrophage_Other	38	9445	0	0	1	1	1	1	1
404	Macrophage_Other,PDL1-,B7H3-,IDO1-	Macrophage_Other	1518	9445	0.111	0.0833	1	0.712	1.89	0.704	1
405	Macrophage_Other	Immune_All	9445	112718	0.166	0.0702	2.19	1.4	3.29	0.000593	0.381
406	Macrophage_Other	Macrophage_All	9445	30577	0.361	0.328	1.12	0.801	1.66	0.496	1
407	Macrophage_All,TIM3,KI67	Macrophage_All,TIM3	1843	23288	0.0765	0.064	1	0.818	1.38	0.735	1
408	Macrophage_All,CD25,KI67	Macrophage_All,CD25	76	1460	0	0	1	1	1	1	1
409	Macrophage_All,PDL1,KI67	Macrophage_All,PDL1	138	2447	0	0.0258	1	0.00173	1	0.762	1
410	Macrophage_All,B7H3,KI67	Macrophage_All,B7H3	2156	25481	0.0896	0.0632	1.07	0.9	1.54	0.371	1
411	Macrophage_All,IDO1,KI67	Macrophage_All,IDO1	40	592	0	0	1	1	1	1	1
412	Macrophage_All,MHCII,KI67	Macrophage_All,MHCII	1279	17645	0.0761	0.0611	1	0.821	1.49	0.601	1
413	Macrophage_All,PDL1,B7H3,IDO1,KI67	Macrophage_All,PDL1,B7H3,IDO1	3	58	0	0	1	1	559000000	1	1
414	Macrophage_All,PDL1,B7H3,IDO1-,KI67	Macrophage_All,PDL1,B7H3,IDO1-	134	2275	0	0.0302	1	0.00144	1.23	0.646	1
415	Macrophage_All,PDL1,B7H3-,IDO1,KI67	Macrophage_All,PDL1,B7H3-,IDO1	0	5	0	0				1	1
416	Macrophage_All,PDL1-,B7H3,IDO1,KI67	Macrophage_All,PDL1-,B7H3,IDO1	30	420	0	0	1	0.0556	1	1	1
417	Macrophage_All,PDL1,B7H3-,IDO1-,KI67	Macrophage_All,PDL1,B7H3-,IDO1-	1	109	0	0	1	1	1	1	1
418	Macrophage_All,PDL1-,B7H3,IDO1-,KI67	Macrophage_All,PDL1-,B7H3,IDO1-	1989	22728	0.0909	0.0622	1.1	0.919	1.59	0.309	1
419	Macrophage_All,PDL1-,B7H3-,IDO1,KI67	Macrophage_All,PDL1-,B7H3-,IDO1	7	109	0	0	1	1	1	1	1
420	Macrophage_All,PDL1-,B7H3-,IDO1-,KI67	Macrophage_All,PDL1-,B7H3-,IDO1-	337	4873	0.027	0	1	1	1	0.542	1
421	Macrophage_All,KI67	Macrophage_All	2501	30577	0.0811	0.0631	1	0.794	1.36	0.759	1
422	Macrophage_All,TIM3	Macrophage_All	23288	30577	0.881	0.928	0.734	0.331	1.21	0.243	1
423	Macrophage_All,CD25	Macrophage_All	1460	30577	0	0	1	1	1	1	1
424	Macrophage_All,PDL1	Macrophage_All	2447	30577	0	0	1	1	1	1	1
425	Macrophage_All,B7H3	Macrophage_All	25481	30577	0.846	0.911	0.61	0.297	1	0.0697	1
426	Macrophage_All,IDO1	Macrophage_All	592	30577	0	0.00335	1	0.396	1	0.00321	1
427	Macrophage_All,MHCII	Macrophage_All	17645	30577	0.5	0.648	0.447	0.266	0.681	0.000112	0.0717
428	Macrophage_All,MRC1	Macrophage_All	5334	30577	0.0986	0.176	0.799	0.43	1.47	0.454	1
429	Macrophage_All,TGM2	Macrophage_All	1229	30577	0.00713	0.0164	1	0.353	1	0.0828	1
430	Macrophage_All,PDL1,B7H3,IDO1	Macrophage_All	58	30577	0	0	1	1	1	1	1
431	Macrophage_All,PDL1,B7H3,IDO1-	Macrophage_All	2275	30577	0	0	1	1	1	1	1
432	Macrophage_All,PDL1,B7H3-,IDO1	Macrophage_All	5	30577	0	0	1	1	1	1	1
433	Macrophage_All,PDL1-,B7H3,IDO1	Macrophage_All	420	30577	0	0	1	1	1	1	1
434	Macrophage_All,PDL1,B7H3-,IDO1-	Macrophage_All	109	30577	0	0	1	1	1	1	1
435	Macrophage_All,PDL1-,B7H3,IDO1-	Macrophage_All	22728	30577	0.82	0.797	1	0.58	1.55	0.95	1
436	Macrophage_All,PDL1-,B7H3-,IDO1	Macrophage_All	109	30577	0	0	1	1	1	1	1
437	Macrophage_All,PDL1-,B7H3-,IDO1-	Macrophage_All	4873	30577	0.144	0.0821	1.56	1	3.28	0.104	1
438	Macrophage_All	Immune_All	30577	112718	0.53	0.235	2.67	1.61	4.15	0.000306	0.197
439	Macrophage_All	T_All	30577	64844	2.96	0.414	1.74	0.944	3.51	0.068	1
440	Leukocyte_Other,PD1,KI67	Leukocyte_Other,PD1	109	392	0.2	0.357	0.45	1.06e-05	2.75	0.278	1
441	Leukocyte_Other,LAG3,KI67	Leukocyte_Other,LAG3	59	241	0.0741	0.458	0.103	3.38e-06	0.36	0.124	1
442	Leukocyte_Other,TIM3,KI67	Leukocyte_Other,TIM3	952	7376	0.222	0.125	2.18	1.52	3.18	0.00012	0.0771
443	Leukocyte_Other,CD27,KI67	Leukocyte_Other,CD27	203	1140	1	0.199	67500	6	175000	0.00291	1
444	Leukocyte_Other,ICOS,KI67	Leukocyte_Other,ICOS	221	737	1	0.349	44100	11800	544000	0.105	1
445	Leukocyte_Other,CD25,KI67	Leukocyte_Other,CD25	11	118	0.167	0.5	0.2	8.46e-06	1	0.204	1
446	Leukocyte_Other,PDL1,KI67	Leukocyte_Other,PDL1	78	804	0	0.0909
447	Leukocyte_Other,B7H3,KI67	Leukocyte_Other,B7H3	996	7999	0.155	0.111	1.58	1.1	2.33	0.0222	1
448	Leukocyte_Other,IDO1,KI67	Leukocyte_Other,IDO1	15	247	0.375	0.106	3.23	1.41e-05	18	0.331	1
449	Leukocyte_Other,KI67	Leukocyte_Other	1115	9263	0.143	0.102	1.42	0.989	1.96	0.0733	1
450	Leukocyte_Other,PD1	Leukocyte_Other	392	9263	0.167	0.0482	3.52	1.19	7.57	0.0136	1
451	Leukocyte_Other,LAG3	Leukocyte_Other	241	9263	0.167	0.0209	9.91	3.11	31	0.000161	0.103
452	Leukocyte_Other,TIM3	Leukocyte_Other	7376	9263	0.718	0.828	0.676	0.404	1.05	0.125	1
453	Leukocyte_Other,CD27	Leukocyte_Other	1140	9263	0.0714	0.0833	0.891	0.45	1.55	0.68	1
454	Leukocyte_Other,ICOS	Leukocyte_Other	737	9263	0.0528	0.0769	1.16	0.534	3.3	0.69	1
455	Leukocyte_Other,CD25	Leukocyte_Other	118	9263	0.12	0.0134	8	2.41	20.4	0.00086	0.552
456	Leukocyte_Other,PDL1	Leukocyte_Other	804	9263	0.0685	0.0948	0.546	0.167	2.5	0.409	1
457	Leukocyte_Other,B7H3	Leukocyte_Other	7999	9263	0.84	0.871	1	0.52	4.14	0.763	1
458	Leukocyte_Other,IDO1	Leukocyte_Other	247	9263	0.069	0.0331	2.86	1.31	6.06	0.006	1
459	Leukocyte_Other,MRC1	Leukocyte_Other	456	9263	0.133	0.0651	3	1.88	5.05	6.33e-06	0.00406
460	Leukocyte_Other,TGM2	Leukocyte_Other	379	9263	0.125	0.0435	2.51	1.37	4.71	0.00327	1
461	Leukocyte_Other	Immune_All	9263	112718	0.0455	0.104	0.57	0.371	0.857	0.00644	1
462	Tumor_All,PDL1,KI67	Tumor_All,PDL1	292	3704	0	0.064	1	0.00121	1	0.683	1
463	Tumor_All,B7H3,KI67	Tumor_All,B7H3	54226	315944	0.113	0.124	0.887	0.644	1.2	0.414	1
464	Tumor_All,IDO1,KI67	Tumor_All,IDO1	405	6232	0.0625	0.025	1.06	1	4	0.206	1
465	Tumor_All,B2M,KI67	Tumor_All,B2M	28915	129013	0.135	0.124	0.892	0.578	1.28	0.486	1
466	Tumor_All,MHCI,KI67	Tumor_All,MHCI	35116	193497	0.143	0.117	1.11	0.827	1.48	0.444	1
467	Tumor_All,MHCII,KI67	Tumor_All,MHCII	1093	7884	0.0871	0.117	0.667	0.352	1	0.0846	1
468	Tumor_All,PDL1,B7H3,IDO1,KI67	Tumor_All,PDL1,B7H3,IDO1	19	1004	0.75	0	54800	58	559000000	0.00983	1
469	Tumor_All,PDL1,B7H3,IDO1-,KI67	Tumor_All,PDL1,B7H3,IDO1-	260	2544	0	0.0806	1	0.000719	11.4	0.693	1
470	Tumor_All,PDL1,B7H3-,IDO1,KI67	Tumor_All,PDL1,B7H3-,IDO1	1	5	0	0	1	1.79e-09	1	1	1
471	Tumor_All,PDL1-,B7H3,IDO1,KI67	Tumor_All,PDL1-,B7H3,IDO1	267	3595	0.0278	0.0303	1	0.901	2.28	0.739	1
472	Tumor_All,PDL1,B7H3-,IDO1-,KI67	Tumor_All,PDL1,B7H3-,IDO1-	12	151	0	0	1	1	1	1	1
473	Tumor_All,PDL1-,B7H3,IDO1-,KI67	Tumor_All,PDL1-,B7H3,IDO1-	53680	308801	0.113	0.127	0.886	0.631	1.17	0.364	1
474	Tumor_All,PDL1-,B7H3-,IDO1,KI67	Tumor_All,PDL1-,B7H3-,IDO1	118	1628	0.0179	0	1	1	1070	0.0134	1
475	Tumor_All,PDL1-,B7H3-,IDO1-,KI67	Tumor_All,PDL1-,B7H3-,IDO1-	15595	130219	0.108	0.0714	1.16	0.862	1.94	0.295	1
476	Tumor_All,B2M,MHCI,MHCII,KI67	Tumor_All,B2M,MHCI,MHCII	889	5245	0.0571	0.116	0.632	0.174	1	0.0442	1
477	Tumor_All,B2M,MHCI,MHCII-,KI67	Tumor_All,B2M,MHCI,MHCII-	26077	118057	0.149	0.124	0.919	0.555	1.32	0.583	1
478	Tumor_All,B2M,MHCI-,MHCII,KI67	Tumor_All,B2M,MHCI-,MHCII	31	228	0	0	1	1	23600	1	1
479	Tumor_All,B2M-,MHCI,MHCII,KI67	Tumor_All,B2M-,MHCI,MHCII	83	1315	0	0	1	1	1	1	1
480	Tumor_All,B2M,MHCI-,MHCII-,KI67	Tumor_All,B2M,MHCI-,MHCII-	1918	5483	0.141	0.0964	1	0.776	4.22	0.752	1
481	Tumor_All,B2M-,MHCI,MHCII-,KI67	Tumor_All,B2M-,MHCI,MHCII-	8067	68880	0.143	0.0952	1.36	1	1.94	0.0643	1
482	Tumor_All,B2M-,MHCI-,MHCII,KI67	Tumor_All,B2M-,MHCI-,MHCII	90	1096	0.0742	0	1240	1	2950	0.00494	1
483	Tumor_All,B2M-,MHCI-,MHCII-,KI67	Tumor_All,B2M-,MHCI-,MHCII-	32797	247643	0.104	0.0714	1.43	1	2.54	0.0713	1
484	Tumor_All,KI67	Tumor_All	69952	447947	0.105	0.116	0.924	0.684	1.15	0.484	1
485	Tumor_All,PDL1	Tumor_All	3704	447947	0	0.000318	1	0.117	1	3.11e-06	0.00199
486	Tumor_All,B7H3	Tumor_All	315944	447947	0.728	0.866	0.353	0.154	0.827	0.0109	1
487	Tumor_All,IDO1	Tumor_All	6232	447947	8.46e-05	0.00289	0.344	0.0805	1	0.000602	0.387
488	Tumor_All,B2M	Tumor_All	129013	447947	0.0357	0.747	0.0188	0.0103	0.0362	1.61e-17	1.03e-14
489	Tumor_All,MHCI	Tumor_All	193497	447947	0.0537	0.959	0.00215	0.00122	0.00371	6.84e-28	4.39e-25
490	Tumor_All,MHCII	Tumor_All	7884	447947	0.00535	0.0235	0.247	0.172	0.344	2.07e-13	1.33e-10
491	Tumor_All,PDL1,B7H3,IDO1	Tumor_All	1004	447947	0	0	1	1	1	1	1
492	Tumor_All,PDL1,B7H3,IDO1-	Tumor_All	2544	447947	0	0	1	1	1	1	1
493	Tumor_All,PDL1,B7H3-,IDO1	Tumor_All	5	447947	0	0	1	1	1	1	1
494	Tumor_All,PDL1-,B7H3,IDO1	Tumor_All	3595	447947	0	0.000559	1	0.157	1	0.00689	1
495	Tumor_All,PDL1,B7H3-,IDO1-	Tumor_All	151	447947	0	0	1	1	1	1	1
496	Tumor_All,PDL1-,B7H3,IDO1-	Tumor_All	308801	447947	0.728	0.814	0.69	0.345	1.33	0.26	1
497	Tumor_All,PDL1-,B7H3-,IDO1	Tumor_All	1628	447947	0	0	1	1	1	1	1
498	Tumor_All,PDL1-,B7H3-,IDO1-	Tumor_All	130219	447947	0.272	0.113	3.01	1.27	6.7	0.00725	1
499	Tumor_All,B2M,MHCI,MHCII	Tumor_All	5245	447947	0.00118	0.0198	0.0658	0.0427	0.1	7.27e-18	4.67e-15
500	Tumor_All,B2M,MHCI,MHCII-	Tumor_All	118057	447947	0.0126	0.699	0.00871	0.0046	0.017	1.64e-18	1.05e-15
501	Tumor_All,B2M,MHCI-,MHCII	Tumor_All	228	447947	0	0	1	1	9.07	1	1
502	Tumor_All,B2M-,MHCI,MHCII	Tumor_All	1315	447947	0	0.000493	1	0.727	1	0.121	1
503	Tumor_All,B2M,MHCI-,MHCII-	Tumor_All	5483	447947	0.00275	0	12.1	3.62	33.4	9.8e-08	6.29e-05
504	Tumor_All,B2M-,MHCI,MHCII-	Tumor_All	68880	447947	0.0228	0.215	0.0746	0.0431	0.128	1.69e-15	1.08e-12
505	Tumor_All,B2M-,MHCI-,MHCII	Tumor_All	1096	447947	0.00122	0	18.6	1	35	7.88e-14	5.06e-11
506	Tumor_All,B2M-,MHCI-,MHCII-	Tumor_All	247643	447947	0.911	0.041	278	169	486	1.19e-28	7.64e-26
507	Tumor_All	DAPI	447947	644553	0.809	0.496	3.61	2.35	5.39	1.22e-07	7.82e-05
508	Immune_All,KI67	Immune_All	16569	112718	0.0738	0.0917	0.742	0.539	0.98	0.0178	1
509	Immune_All	DAPI	112718	644553	0.0532	0.253	0.234	0.16	0.348	1.82e-10	1.17e-07
996	Immune_All,B2M	Immune_All	98552	112718	0.614	0.91	0.189	0.129	0.274	1.16e-13	7.46e-11
997	T_All,B2M	T_All	60537	64844	0.929	0.97	0.623	0.295	1	0.035	1
998	B_All,B2M	B_All	1619	1761	1	1	1	0.226	1	0.0655	1
999	NK_All,B2M	NK_All	4023	6273	0.4	0.857	0.102	0.0492	0.206	2.95e-10	1.9e-07
1000	Macrophage_All,B2M	Macrophage_All	25153	30577	0.701	0.904	0.225	0.154	0.333	4.71e-11	3.02e-08
1001	Leukocyte_Other,B2M	Leukocyte_Other	7220	9263	0.5	0.835	0.247	0.143	0.455	0.000115	0.0739
1002	T_null,B2M	T_null	966	1130	1	0.957	1	0.333	1	0.464	1
1003	T_CD4,B2M	T_CD4	18298	19881	0.959	0.966	1	0.651	1	0.633	1
1004	T_CD8,B2M	T_CD8	34712	36913	1	0.969	1	0.587	1	0.75	1
1005	T_CD4/CD8,B2M	T_CD4/CD8	1078	1124	1	1	1	1	1	0.32	1
1006	T_regDN,B2M	T_regDN	78	96	0	1
1007	T_reg4,B2M	T_reg4	5011	5274	1	0.972	1	1	1	0.844	1
1008	T_reg8,B2M	T_reg8	394	426	1	1	1	1	1480	0.439	1
1009	NK,B2M	NK	2828	5015	0.4	0.778	0.162	0.0808	0.31	4.81e-08	3.09e-05
1010	NKT,B2M	NKT	244	262	1	1	1	1.21e-05	1	0.388	1
1011	NKT_CD8,B2M	NKT_CD8	617	643	1	1	1	1	1	0.741	1
1012	NKT_CD4,B2M	NKT_CD4	334	353	1	1	1	1	1	0.289	1
1013	Macrophage_MHCII+,B2M	Macrophage_MHCII+	12171	13264	0.867	0.983	0.208	0.0808	0.578	2.19e-05	0.014
1014	Macrophage_MHCII-,B2M	Macrophage_MHCII-	5956	7868	0.63	0.859	0.292	0.154	0.511	1.42e-05	0.00913
1015	Macrophage_Other,B2M	Macrophage_Other	7026	9445	0.561	0.889	0.175	0.107	0.272	3.38e-11	2.17e-08
1016	Immune_All,MHCI	Immune_All	105424	112718	0.646	0.989	0.018	0.00909	0.033	1.03e-24	6.63e-22
1017	T_All,MHCI	T_All	63534	64844	0.921	0.999	0.054	0.0118	1	9.38e-05	0.0602
1018	B_All,MHCI	B_All	1666	1761	0.5	1	8.46e-05	2.12e-05	1	4.45e-08	2.86e-05
1019	NK_All,MHCI	NK_All	4387	6273	0.333	0.98	0.00119	6.35e-05	0.0206	9.17e-17	5.89e-14
1020	Macrophage_All,MHCI	Macrophage_All	27199	30577	0.667	0.987	0.0179	0.00598	0.042	9.02e-20	5.79e-17
1021	Leukocyte_Other,MHCI	Leukocyte_Other	8638	9263	0.545	0.997	0.0127	0.000381	0.047	7.68e-14	4.93e-11
1022	T_null,MHCI	T_null	1074	1130	0.9	1	1	4.23e-05	1	5.6e-05	0.036
1023	T_CD4,MHCI	T_CD4	19420	19881	0.929	1	0.25	0.0201	1	2.28e-05	0.0147
1024	T_CD8,MHCI	T_CD8	36290	36913	1	1	1	0.0316	1	0.000779	0.5
1025	T_CD4/CD8,MHCI	T_CD4/CD8	1105	1124	1	1	1	8.46e-05	1	2.55e-08	1.64e-05
1026	T_regDN,MHCI	T_regDN	94	96	0	1
1027	T_reg4,MHCI	T_reg4	5127	5274	1	1	1	0.0611	1	0.000208	0.134
1028	T_reg8,MHCI	T_reg8	424	426	1	1	1	1	1	0.663	1
1029	NK,MHCI	NK	3166	5015	0.333	0.959	0.00647	7.05e-05	0.0349	2.32e-14	1.49e-11
1030	NKT,MHCI	NKT	254	262	0.5	1	1	1.79e-09	1	3.24e-05	0.0208
1031	NKT_CD8,MHCI	NKT_CD8	630	643	1	1	1	1	1	0.00102	0.658
1032	NKT_CD4,MHCI	NKT_CD4	337	353	1	1	1	1	1	0.000102	0.0652
1033	Macrophage_MHCII+,MHCI	Macrophage_MHCII+	12538	13264	0.791	1	0.0005	0.000209	0.00381	6.6e-15	4.24e-12
1034	Macrophage_MHCII-,MHCI	Macrophage_MHCII-	6541	7868	0.543	1	0.000219	9.97e-05	0.0111	7.33e-18	4.71e-15
1035	Macrophage_Other,MHCI	Macrophage_Other	8120	9445	0.702	1	0.00031	0.000153	0.0175	4.5e-19	2.89e-16
1036	Immune_All,MHCII	Immune_All	52192	112718	0.298	0.457	0.555	0.406	0.735	6.74e-05	0.0433
1037	T_All,MHCII	T_All	26658	64844	0.163	0.375	0.317	0.188	0.493	1.32e-07	8.45e-05
1038	B_All,MHCII	B_All	822	1761	0.0333	0.5	0.00095	0.000113	0.571	0.00485	1
1039	NK_All,MHCII	NK_All	1820	6273	0.0944	0.417	0.161	0.0767	0.278	1.03e-09	6.63e-07
1040	Leukocyte_Other,MHCII	Leukocyte_Other	5247	9263	0.392	0.565	0.689	0.448	1.16	0.175	1
1041	T_null,MHCII	T_null	427	1130	0	0.31	0.000169	8.46e-05	0.75	5.44e-05	0.0349
1042	T_CD8,MHCII	T_CD8	13869	36913	0.111	0.36	0.217	0.0842	0.436	4.06e-06	0.00261
1043	T_CD4/CD8,MHCII	T_CD4/CD8	626	1124	0.111	0.588	0.0235	4.23e-05	0.5	0.00398	1
1044	T_reg8,MHCII	T_reg8	174	426	0	0.225	0.000161	4.23e-05	1	0.0155	1
1045	NK,MHCII	NK	1124	5015	0.0833	0.304	0.208	0.0961	0.404	5.52e-07	0.000354
1046	NKT,MHCII	NKT	155	262	1	0.667	1	0.000106	16500	0.487	1
1047	NKT_CD8,MHCII	NKT_CD8	360	643	0.5	0.5	1	0.333	7880	0.622	1
1048	NKT_CD4,MHCII	NKT_CD4	181	353	0	0.75	4.65e-05	2.12e-05	0.000148	1.63e-05	0.0104
1049	Macrophage_MHCII+,MHCII	Macrophage_MHCII+	13264	13264	1	1
1050	Macrophage_MHCII-,MHCII	Macrophage_MHCII-	0	7868	0	0				1	1
1051	Macrophage_Other,MHCII	Macrophage_Other	4381	9445	0.43	0.519	0.582	0.394	0.851	0.00561	1
1052	Immune_All,B2M,KI67	Immune_All,B2M	15535	98552	0.0827	0.1	0.781	0.558	1	0.0659	1
1053	T_All,B2M,KI67	T_All,B2M	11711	60537	0.0277	0.0969	0.254	0.00111	0.604	5.47e-05	0.0351
1054	B_All,B2M,KI67	B_All,B2M	143	1619	0	0.0355	0.109	0.000656	1	0.000392	0.251
1055	NK_All,B2M,KI67	NK_All,B2M	567	4023	0	0.111	1	0.303	1	0.0188	1
1056	Macrophage_All,B2M,KI67	Macrophage_All,B2M	2160	25153	0.0909	0.0652	1	0.852	1.44	0.575	1
1057	Leukocyte_Other,B2M,KI67	Leukocyte_Other,B2M	954	7220	0.226	0.107	2.33	1.5	4.2	0.000411	0.264
1058	T_null,B2M,KI67	T_null,B2M	126	966	0	0.0625	1	0.000592	1	0.0413	1
1059	T_CD4,B2M,KI67	T_CD4,B2M	2243	18298	0	0.0638	0.156	0.00105	0.643	0.000141	0.0902
1060	T_CD8,B2M,KI67	T_CD8,B2M	7849	34712	0	0.104	0.000846	0.000529	0.201	1.68e-06	0.00108
1061	T_CD4/CD8,B2M,KI67	T_CD4/CD8,B2M	144	1078	0	0.0592	1	0.000389	1	0.0283	1
1062	T_regDN,B2M,KI67	T_regDN,B2M	24	78	0	0.268
1063	T_reg4,B2M,KI67	T_reg4,B2M	1206	5011	0	0.143	0.232	0.000582	0.99	0.00727	1
1064	T_reg8,B2M,KI67	T_reg8,B2M	119	394	0	0.191	1	0.000116	1	0.361	1
1065	NK,B2M,KI67	NK,B2M	349	2828	0	0.0606	1	0.433	1	0.039	1
1066	NKT,B2M,KI67	NKT,B2M	29	244	0	0	1	0.000317	47300	1	1
1067	NKT_CD8,B2M,KI67	NKT_CD8,B2M	158	617	0.45	0	3	1	23600	0.0555	1
1068	NKT_CD4,B2M,KI67	NKT_CD4,B2M	31	334	0	0	1	1	1	1	1
1069	Macrophage_MHCII+,B2M,KI67	Macrophage_MHCII+,B2M	817	12171	0.0856	0.0494	1.23	1	2.05	0.104	1
1070	Macrophage_MHCII-,B2M,KI67	Macrophage_MHCII-,B2M	697	5956	0.05	0.0526	1	0.847	1.12	0.903	1
1071	Macrophage_Other,B2M,KI67	Macrophage_Other,B2M	646	7026	0.0721	0.066	1	0.81	1.17	0.991	1
1072	Immune_All,MHCI,KI67	Immune_All,MHCI	16004	105424	0.0819	0.0933	0.744	0.519	1	0.0305	1
1073	T_All,MHCI,KI67	T_All,MHCI	11963	63534	0.0244	0.104	0.214	0.0011	0.539	2.48e-05	0.0159
1074	B_All,MHCI,KI67	B_All,MHCI	146	1666	0	0.0417	0.00313	0.000656	1	0.00345	1
1075	NK_All,MHCI,KI67	NK_All,MHCI	569	4387	0	0.0889	1	0.333	1	0.0409	1
1076	Macrophage_All,MHCI,KI67	Macrophage_All,MHCI	2258	27199	0.0839	0.0637	1	0.815	1.38	0.742	1
1077	Leukocyte_Other,MHCI,KI67	Leukocyte_Other,MHCI	1068	8638	0.158	0.105	1.78	1.11	2.98	0.0152	1
1078	T_null,MHCI,KI67	T_null,MHCI	137	1074	0	0.0556	1	0.000529	1	0.0226	1
1079	T_CD4,MHCI,KI67	T_CD4,MHCI	2308	19420	0	0.0659	0.00228	0.000853	0.484	6.01e-05	0.0386
1080	T_CD8,MHCI,KI67	T_CD8,MHCI	8005	36290	0	0.0997	0.000783	0.000494	0.0853	4.31e-07	0.000277
1081	T_CD4/CD8,MHCI,KI67	T_CD4/CD8,MHCI	142	1105	0	0.0569	0.5	0.000243	1	0.00138	0.884
1082	T_regDN,MHCI,KI67	T_regDN,MHCI	26	94	0	0.222
1083	T_reg4,MHCI,KI67	T_reg4,MHCI	1220	5127	0	0.135	0.198	0.000592	1	0.0146	1
1084	T_reg8,MHCI,KI67	T_reg8,MHCI	125	424	0	0.2	1	0.000127	1	0.204	1
1085	NK,MHCI,KI67	NK,MHCI	350	3166	0	0.0455	1	0.526	1	0.13	1
1086	NKT,MHCI,KI67	NKT,MHCI	30	254	0	0	1	0.000296	559000000	1	1
1087	NKT_CD8,MHCI,KI67	NKT_CD8,MHCI	158	630	0.333	0	1	1	23600	0.18	1
1088	NKT_CD4,MHCI,KI67	NKT_CD4,MHCI	31	337	0	0	1	1	1	1	1
1089	Macrophage_MHCII+,MHCI,KI67	Macrophage_MHCII+,MHCI	829	12538	0.0886	0.0484	1.26	1	2.08	0.089	1
1090	Macrophage_MHCII-,MHCI,KI67	Macrophage_MHCII-,MHCI	718	6541	0.0506	0.05	1	0.833	1	0.809	1
1091	Macrophage_Other,MHCI,KI67	Macrophage_Other,MHCI	711	8120	0.0625	0.0588	1	0.704	1.2	0.8	1
1092	Immune_All,MHCII,KI67	Immune_All,MHCII	7823	52192	0.0839	0.11	0.767	0.561	1	0.0441	1
1093	T_All,MHCII,KI67	T_All,MHCII	5504	26658	0	0.114	0.193	0.000677	0.694	0.000691	0.443
1094	B_All,MHCII,KI67	B_All,MHCII	95	822	0	0	1	1	1	1	1
1095	NK_All,MHCII,KI67	NK_All,MHCII	320	1820	0	0.104	1	0.349	1	0.0551	1
1096	Leukocyte_Other,MHCII,KI67	Leukocyte_Other,MHCII	625	5247	0.25	0.112	2.2	1.44	3.31	0.000907	0.582
1097	T_null,MHCII,KI67	T_null,MHCII	62	427	0	0.105	1	0.000178	1	0.163	1
1098	T_CD8,MHCII,KI67	T_CD8,MHCII	3413	13869	0	0.125	0.00103	0.00036	1	0.0188	1
1099	T_CD4/CD8,MHCII,KI67	T_CD4/CD8,MHCII	82	626	0	0	1	0.000212	1	1	1
1100	T_reg8,MHCII,KI67	T_reg8,MHCII	54	174	0	0.25
1101	NK,MHCII,KI67	NK,MHCII	174	1124	0	0.0714	1	0.208	1	0.0172	1
1102	NKT,MHCII,KI67	NKT,MHCII	22	155	0	0	1	0.000254	23600	1	1
1103	NKT_CD8,MHCII,KI67	NKT_CD8,MHCII	108	360	1	0.125	7880	1	70900	0.136	1
1104	NKT_CD4,MHCII,KI67	NKT_CD4,MHCII	16	181	0	0	1	1	1	1	1
1105	Macrophage_MHCII+,MHCII,KI67	Macrophage_MHCII+,MHCII	860	13264	0.0741	0.0497	1	0.929	1.6	0.429	1
1106	Macrophage_MHCII-,MHCII,KI67	Macrophage_MHCII-,MHCII	0	0	0	0				1	1
1107	Macrophage_Other,MHCII,KI67	Macrophage_Other,MHCII	419	4381	0.0625	0.0646	1	0.692	1	0.585	1
1108	T_All,B2M-,MHCI-,MHCII-	T_All	517	64844	0	0.000132	1	1	1	0.156	1
1109	T_All,B2M-,MHCI-,MHCII	T_All	14	64844	0	0	1	1	1	1	1
1110	T_All,B2M-,MHCI,MHCII-	T_All	3196	64844	0	0.0193	0.919	0.0205	1	0.0154	1
1111	T_All,B2M,MHCI-,MHCII-	T_All	735	64844	0	0	1	1	1	1	1
1112	T_All,B2M-,MHCI,MHCII	T_All	580	64844	0	0	1	0.0433	1	1	1
1113	T_All,B2M,MHCI-,MHCII	T_All	44	64844	0	0	1	1	1	1	1
1114	T_All,B2M,MHCI,MHCII-	T_All	33738	64844	0.561	0.553	1	0.693	1.54	0.906	1
1115	T_All,B2M,MHCI,MHCII	T_All	26020	64844	0.125	0.356	0.261	0.144	0.417	2.48e-09	1.59e-06
1116	T_All,B2M-,MHCI-,MHCII-,KI67	T_All,B2M-,MHCI-,MHCII-	46	517	0	0	1	1	1	1	1
1117	T_All,B2M-,MHCI-,MHCII,KI67	T_All,B2M-,MHCI-,MHCII	1	14	0	0	1	1.79e-09	1	1	1
1118	T_All,B2M-,MHCI,MHCII-,KI67	T_All,B2M-,MHCI,MHCII-	306	3196	0	0.0443	0.00197	0.000719	1	0.000349	0.224
1119	T_All,B2M,MHCI-,MHCII-,KI67	T_All,B2M,MHCI-,MHCII-	106	735	0	0	1	1	1	1	1
1120	T_All,B2M-,MHCI,MHCII,KI67	T_All,B2M-,MHCI,MHCII	52	580	0	0	1	0.000296	1	1	1
1121	T_All,B2M,MHCI-,MHCII,KI67	T_All,B2M,MHCI-,MHCII	0	44	0	0				1	1
1122	T_All,B2M,MHCI,MHCII-,KI67	T_All,B2M,MHCI,MHCII-	6154	33738	0	0.107	0.103	0.000815	0.486	2.05e-05	0.0132
1123	T_All,B2M,MHCI,MHCII,KI67	T_All,B2M,MHCI,MHCII	5451	26020	0.0222	0.117	0.321	0.000957	0.962	0.00922	1
1124	B_All,B2M-,MHCI-,MHCII-	B_All	52	1761	0	0	1	1	1	1	1
1125	B_All,B2M-,MHCI-,MHCII	B_All	1	1761	0	0	1	1	1	1	1
1126	B_All,B2M-,MHCI,MHCII-	B_All	83	1761	0	0	1	1	1	1	1
1127	B_All,B2M,MHCI-,MHCII-	B_All	37	1761	0	0	1	1	1	1	1
1128	B_All,B2M-,MHCI,MHCII	B_All	6	1761	0	0	1	1	1	1	1
1129	B_All,B2M,MHCI-,MHCII	B_All	5	1761	0	0	1	1	1	1	1
1130	B_All,B2M,MHCI,MHCII-	B_All	767	1761	0	0.333	0.000381	0.000127	0.5	0.000718	0.461
1131	B_All,B2M,MHCI,MHCII	B_All	810	1761	0	0.5	0.000228	4.62e-05	0.104	8.02e-05	0.0515
1132	B_All,B2M-,MHCI-,MHCII-,KI67	B_All,B2M-,MHCI-,MHCII-	6	52	0	0	1	7.05e-05	1	1	1
1133	B_All,B2M-,MHCI-,MHCII,KI67	B_All,B2M-,MHCI-,MHCII	1	1	1	0
1134	B_All,B2M-,MHCI,MHCII-,KI67	B_All,B2M-,MHCI,MHCII-	5	83	0	0	1	0.000508	1	1	1
1135	B_All,B2M,MHCI-,MHCII-,KI67	B_All,B2M,MHCI-,MHCII-	2	37	0	0	1	1.79e-09	1	1	1
1136	B_All,B2M-,MHCI,MHCII,KI67	B_All,B2M-,MHCI,MHCII	0	6	0	0				1	1
1137	B_All,B2M,MHCI-,MHCII,KI67	B_All,B2M,MHCI-,MHCII	0	5	0	0				1	1
1138	B_All,B2M,MHCI,MHCII-,KI67	B_All,B2M,MHCI,MHCII-	47	767	0	0	1	1	1	1	1
1139	B_All,B2M,MHCI,MHCII,KI67	B_All,B2M,MHCI,MHCII	94	810	0	0	1	0.00216	1	1	1
1140	NK_All,B2M-,MHCI-,MHCII-	NK_All	1515	6273	0.481	0	5160	39.2	12700	2.43e-14	1.56e-11
1141	NK_All,B2M-,MHCI-,MHCII	NK_All	52	6273	0	0	1	1	1	1	1
1142	NK_All,B2M-,MHCI,MHCII-	NK_All	569	6273	0	0.0535	0.731	0.188	1	0.00186	1
1143	NK_All,B2M,MHCI-,MHCII-	NK_All	229	6273	0	0	1	1	1	1	1
1144	NK_All,B2M-,MHCI,MHCII	NK_All	114	6273	0	0	1	1	1	1	1
1145	NK_All,B2M,MHCI-,MHCII	NK_All	90	6273	0	0	1	1	1	1	1
1146	NK_All,B2M,MHCI,MHCII-	NK_All	2140	6273	0.2	0.34	0.54	0.298	0.926	0.00492	1
1147	NK_All,B2M,MHCI,MHCII	NK_All	1564	6273	0	0.364	0.025	0.000212	0.0893	5.4e-14	3.47e-11
1148	NK_All,B2M-,MHCI-,MHCII-,KI67	NK_All,B2M-,MHCI-,MHCII-	79	1515	0	0	1	1	1	1	1
1149	NK_All,B2M-,MHCI-,MHCII,KI67	NK_All,B2M-,MHCI-,MHCII	2	52	0	0	1	1	1	1	1
1150	NK_All,B2M-,MHCI,MHCII-,KI67	NK_All,B2M-,MHCI,MHCII-	26	569	0	0	1	1	1	1	1
1151	NK_All,B2M,MHCI-,MHCII-,KI67	NK_All,B2M,MHCI-,MHCII-	24	229	0	0	1	1	1	1	1
1152	NK_All,B2M-,MHCI,MHCII,KI67	NK_All,B2M-,MHCI,MHCII	8	114	0	0	1	1	1	1	1
1153	NK_All,B2M,MHCI-,MHCII,KI67	NK_All,B2M,MHCI-,MHCII	8	90	0	0	1	1	5910	1	1
1154	NK_All,B2M,MHCI,MHCII-,KI67	NK_All,B2M,MHCI,MHCII-	233	2140	0	0.0453	1	0.725	1	0.166	1
1155	NK_All,B2M,MHCI,MHCII,KI67	NK_All,B2M,MHCI,MHCII	302	1564	0	0.1	1	0.947	1	0.811	1
1156	Macrophage_All,B2M-,MHCI-,MHCII-	Macrophage_All	1535	30577	0.117	0	40.5	11.6	1080	7.19e-16	4.62e-13
1157	Macrophage_All,B2M-,MHCI-,MHCII	Macrophage_All	630	30577	0.0367	0	164	2.57	713	5.96e-11	3.82e-08
1158	Macrophage_All,B2M-,MHCI,MHCII-	Macrophage_All	2096	30577	0.0285	0.0293	1	0.492	1.09	0.414	1
1159	Macrophage_All,B2M,MHCI-,MHCII-	Macrophage_All	658	30577	0.016	0	98.4	4.26	303	3.03e-11	1.94e-08
1160	Macrophage_All,B2M-,MHCI,MHCII	Macrophage_All	1163	30577	0	0.0119	1	1	1	0.502	1
1161	Macrophage_All,B2M,MHCI-,MHCII	Macrophage_All	555	30577	0.0116	0	4.17	1	169	4.51e-09	2.9e-06
1162	Macrophage_All,B2M,MHCI,MHCII-	Macrophage_All	8643	30577	0.19	0.266	0.582	0.384	0.896	0.0106	1
1163	Macrophage_All,B2M,MHCI,MHCII	Macrophage_All	15297	30577	0.27	0.535	0.244	0.165	0.357	2.45e-12	1.57e-09
1164	Macrophage_All,B2M-,MHCI-,MHCII-,KI67	Macrophage_All,B2M-,MHCI-,MHCII-	98	1535	0.0199	0	1	1	675	0.000264	0.17
1165	Macrophage_All,B2M-,MHCI-,MHCII,KI67	Macrophage_All,B2M-,MHCI-,MHCII	35	630	0	0	1	1	1	1	1
1166	Macrophage_All,B2M-,MHCI,MHCII-,KI67	Macrophage_All,B2M-,MHCI,MHCII-	133	2096	0	0	1	1	1	1	1
1167	Macrophage_All,B2M,MHCI-,MHCII-,KI67	Macrophage_All,B2M,MHCI-,MHCII-	65	658	0	0	1	1	1	1	1
1168	Macrophage_All,B2M-,MHCI,MHCII,KI67	Macrophage_All,B2M-,MHCI,MHCII	75	1163	0	0	1	1	1	1	1
1169	Macrophage_All,B2M,MHCI-,MHCII,KI67	Macrophage_All,B2M,MHCI-,MHCII	45	555	0	0	1	1	1580	1	1
1170	Macrophage_All,B2M,MHCI,MHCII-,KI67	Macrophage_All,B2M,MHCI,MHCII-	926	8643	0.0714	0.0737	1	0.854	1.35	0.756	1
1171	Macrophage_All,B2M,MHCI,MHCII,KI67	Macrophage_All,B2M,MHCI,MHCII	1124	15297	0.0934	0.0552	1.24	1	1.94	0.103	1

## Sheet: sig_fractions (n=54)
ID	Cell State (Numerator)	Population (Denominator)	Cell state cell count	Population cell count	Tumor_All MHCI Low median fraction	Tumor_All MHCI High median fraction	Odds Ratio	CI.low	CI.high	p.value	adjusted p.value
1018	B_All,MHCI	B_All	1666	1761	0.5	1	8.46e-05	2.12e-05	1	4.45e-08	2.86e-05
157	T_CD4/CD8,CD27	T_CD4/CD8	772	1124	0	0.667	0.000127	3.17e-05	0.231	3.93e-05	0.0253
1041	T_null,MHCII	T_null	427	1130	0	0.31	0.000169	8.46e-05	0.75	5.44e-05	0.0349
1140	NK_All,B2M-,MHCI-,MHCII-	NK_All	1515	6273	0.481	0	5160	39.2	12700	2.43e-14	1.56e-11
1034	Macrophage_MHCII-,MHCI	Macrophage_MHCII-	6541	7868	0.543	1	0.000219	9.97e-05	0.0111	7.33e-18	4.71e-15
1035	Macrophage_Other,MHCI	Macrophage_Other	8120	9445	0.702	1	0.00031	0.000153	0.0175	4.5e-19	2.89e-16
1033	Macrophage_MHCII+,MHCI	Macrophage_MHCII+	12538	13264	0.791	1	0.0005	0.000209	0.00381	6.6e-15	4.24e-12
58	T_CD8,PD1,LAG3-,TIM3	T_CD8	7470	36913	0	0.143	0.000526	0.000355	0.157	1.23e-06	0.000791
51	T_CD8,PD1	T_CD8	13992	36913	0	0.246	0.000561	0.000239	0.203	3.12e-06	0.00201
38	T_CD8,TIM3,KI67	T_CD8,TIM3	7448	30612	0	0.122	0.00067	0.000377	0.0033	3.39e-06	0.00218
52	T_CD8,LAG3	T_CD8	8258	36913	0	0.156	0.000736	0.000321	0.129	7.68e-07	0.000493
1060	T_CD8,B2M,KI67	T_CD8,B2M	7849	34712	0	0.104	0.000846	0.000529	0.201	1.68e-06	0.00108
235	NK	NK_All	5015	6273	1	0.75	945	14	4170	1.6e-12	1.03e-09
1019	NK_All,MHCI	NK_All	4387	6273	0.333	0.98	0.00119	6.35e-05	0.0206	9.17e-17	5.89e-14
489	Tumor_All,MHCI	Tumor_All	193497	447947	0.0537	0.959	0.00215	0.00122	0.00371	6.84e-28	4.39e-25
506	Tumor_All,B2M-,MHCI-,MHCII-	Tumor_All	247643	447947	0.911	0.041	278	169	486	1.19e-28	7.64e-26
1029	NK,MHCI	NK	3166	5015	0.333	0.959	0.00647	7.05e-05	0.0349	2.32e-14	1.49e-11
500	Tumor_All,B2M,MHCI,MHCII-	Tumor_All	118057	447947	0.0126	0.699	0.00871	0.0046	0.017	1.64e-18	1.05e-15
1021	Leukocyte_Other,MHCI	Leukocyte_Other	8638	9263	0.545	0.997	0.0127	0.000381	0.047	7.68e-14	4.93e-11
1020	Macrophage_All,MHCI	Macrophage_All	27199	30577	0.667	0.987	0.0179	0.00598	0.042	9.02e-20	5.79e-17
1016	Immune_All,MHCI	Immune_All	105424	112718	0.646	0.989	0.018	0.00909	0.033	1.03e-24	6.63e-22
488	Tumor_All,B2M	Tumor_All	129013	447947	0.0357	0.747	0.0188	0.0103	0.0362	1.61e-17	1.03e-14
1156	Macrophage_All,B2M-,MHCI-,MHCII-	Macrophage_All	1535	30577	0.117	0	40.5	11.6	1080	7.19e-16	4.62e-13
1147	NK_All,B2M,MHCI,MHCII	NK_All	1564	6273	0	0.364	0.025	0.000212	0.0893	5.4e-14	3.47e-11
504	Tumor_All,B2M-,MHCI,MHCII-	Tumor_All	68880	447947	0.0228	0.215	0.0746	0.0431	0.128	1.69e-15	1.08e-12
54	T_CD8,CD27	T_CD8	24209	36913	0	0.478	0.083	0.000136	0.275	1.58e-07	0.000101
25	T_CD4,PD1,LAG3-,TIM3	T_CD4	2415	19881	0	0.101	0.085	0.000905	0.48	2.49e-06	0.0016
999	NK_All,B2M	NK_All	4023	6273	0.4	0.857	0.102	0.0492	0.206	2.95e-10	1.9e-07
1122	T_All,B2M,MHCI,MHCII-,KI67	T_All,B2M,MHCI,MHCII-	6154	33738	0	0.107	0.103	0.000815	0.486	2.05e-05	0.0132
20	T_CD4,CD27	T_CD4	8321	19881	0.0135	0.349	0.13	0.000949	0.282	1.54e-09	9.87e-07
65	T_CD8	Immune_All	36913	112718	0.0133	0.167	0.135	0.0567	0.349	2.18e-06	0.0014
55	T_CD8,ICOS	T_CD8	15269	36913	0	0.318	0.146	0.000248	0.5	1.3e-05	0.00832
179	T_All,TIM3,KI67	T_All,TIM3	10609	51452	0	0.106	0.148	0.000685	0.467	1.16e-05	0.00745
17	T_CD4,PD1	T_CD4	4041	19881	0	0.149	0.15	0.000735	0.589	3.77e-05	0.0242
1039	NK_All,MHCII	NK_All	1820	6273	0.0944	0.417	0.161	0.0767	0.278	1.03e-09	6.63e-07
1009	NK,B2M	NK	2828	5015	0.4	0.778	0.162	0.0808	0.31	4.81e-08	3.09e-05
90	T_reg4,MHCII	T_reg4	2477	5274	0.125	0.467	0.171	0.0742	0.349	2.85e-06	0.00183
1015	Macrophage_Other,B2M	Macrophage_Other	7026	9445	0.561	0.889	0.175	0.107	0.272	3.38e-11	2.17e-08
996	Immune_All,B2M	Immune_All	98552	112718	0.614	0.91	0.189	0.129	0.274	1.16e-13	7.46e-11
1045	NK,MHCII	NK	1124	5015	0.0833	0.304	0.208	0.0961	0.404	5.52e-07	0.000354
190	T_All	Immune_All	64844	112718	0.134	0.559	0.208	0.123	0.345	1e-07	6.42e-05
1013	Macrophage_MHCII+,B2M	Macrophage_MHCII+	12171	13264	0.867	0.983	0.208	0.0808	0.578	2.19e-05	0.014
184	T_All,PD1	T_All	19461	64844	0.0484	0.188	0.213	0.044	0.542	5.17e-06	0.00332
1042	T_CD8,MHCII	T_CD8	13869	36913	0.111	0.36	0.217	0.0842	0.436	4.06e-06	0.00261
187	T_All,CD27	T_All	37980	64844	0.138	0.444	0.219	0.116	0.394	1.24e-07	7.94e-05
1000	Macrophage_All,B2M	Macrophage_All	25153	30577	0.701	0.904	0.225	0.154	0.333	4.71e-11	3.02e-08
509	Immune_All	DAPI	112718	644553	0.0532	0.253	0.234	0.16	0.348	1.82e-10	1.17e-07
1163	Macrophage_All,B2M,MHCI,MHCII	Macrophage_All	15297	30577	0.27	0.535	0.244	0.165	0.357	2.45e-12	1.57e-09
1115	T_All,B2M,MHCI,MHCII	T_All	26020	64844	0.125	0.356	0.261	0.144	0.417	2.48e-09	1.59e-06
507	Tumor_All	DAPI	447947	644553	0.809	0.496	3.61	2.35	5.39	1.22e-07	7.82e-05
1014	Macrophage_MHCII-,B2M	Macrophage_MHCII-	5956	7868	0.63	0.859	0.292	0.154	0.511	1.42e-05	0.00913
23	T_CD4,MHCII	T_CD4	9045	19881	0.218	0.375	0.307	0.167	0.499	5.41e-08	3.47e-05
1037	T_All,MHCII	T_All	26658	64844	0.163	0.375	0.317	0.188	0.493	1.32e-07	8.45e-05
1036	Immune_All,MHCII	Immune_All	52192	112718	0.298	0.457	0.555	0.406	0.735	6.74e-05	0.0433

## Sheet: sig_fractions_FigS13 (n=9)
ID	Cell State (Numerator)	Population (Denominator)	Cell state cell count	Population cell count	Tumor_All MHCI Low median fraction	Tumor_All MHCI High median fraction	Odds Ratio	CI.low	CI.high	p.value	adjusted p.value
509	Immune_All	DAPI	112718	644553	0.0532	0.253	0.234	0.16	0.348	1.82e-10	1.17e-07
190	T_All	Immune_All	64844	112718	0.134	0.559	0.208	0.123	0.345	1e-07	6.42e-05
187	T_All,CD27	T_All	37980	64844	0.138	0.444	0.219	0.116	0.394	1.24e-07	7.94e-05
20	T_CD4,CD27	T_CD4	8321	19881	0.0135	0.349	0.13	0.000949	0.282	1.54e-09	9.87e-07
23	T_CD4,MHCII	T_CD4	9045	19881	0.218	0.375	0.307	0.167	0.499	5.41e-08	3.47e-05
58	T_CD8,PD1,LAG3-,TIM3	T_CD8	7470	36913	0	0.143	0.000526	0.000355	0.157	1.23e-06	0.000791
52	T_CD8,LAG3	T_CD8	8258	36913	0	0.156	0.000736	0.000321	0.129	7.68e-07	0.000493
54	T_CD8,CD27	T_CD8	24209	36913	0	0.478	0.083	0.000136	0.275	1.58e-07	0.000101
235	NK	NK_All	5015	6273	1	0.75	945	14	4170	1.6e-12	1.03e-09
