# Supplementary material for: Tumor MHC Class I Expression Associates with Intralesional IL2 Response in Melanoma
Source: Oxford University Press journal article supplement (doi:10.1158/2326-6066.cir-21-1083), 2022-01-10
Supplement: cir-21-1083_supplementary_data_supp16.xlsx [file cir-21-1083_supplementary_data_supp16.xlsx]

## Sheet: all_genes (n=770)
Gene ID	baseMean	log2FoldChange	lfcSE	stat	pvalue	padj
CXCL11	601.752	4.65972	0.56934	8.18443	2.74e-16	2.05e-13
GNLY	248.42	2.90406	0.390431	7.43809	1.02e-13	3.83e-11
IDO1	879.992	4.01803	0.658073	6.10576	1.02e-09	2.56e-07
HLA-DQA1	656.034	-7.53123	1.30571	-5.7679	8.03e-09	1.5e-06
HLA-DQB1	197.225	-4.9693	0.973397	-5.10512	3.31e-07	4.96e-05
CXCL10	1958.41	3.26582	0.698877	4.67295	2.97e-06	0.00022268
GBP4	684.343	2.25044	0.481076	4.67793	2.9e-06	0.00022268
ID4	681.845	-2.09328	0.446039	-4.69305	2.69e-06	0.00022268
IFI35	681.201	1.96372	0.413965	4.74369	2.1e-06	0.00022268
RSAD2	267.296	2.85443	0.608014	4.69468	2.67e-06	0.00022268
SOX2	128.374	-4.65014	1.00072	-4.6468	3.37e-06	0.000229855
CNTFR	31.4186	-2.91039	0.638319	-4.55946	5.13e-06	0.00032053
BCL2	295.955	-1.04348	0.233604	-4.46688	7.94e-06	0.000453034
ISG15	534.954	2.2282	0.500349	4.45329	8.46e-06	0.000453034
PDK1	304.164	-1.56695	0.353145	-4.43713	9.12e-06	0.000455825
PRKAA2	22.1588	-2.02087	0.463537	-4.35967	1.3e-05	0.000610579
PRKCA	241.432	-1.48406	0.342681	-4.33074	1.49e-05	0.000655615
IFIT2	283.444	2.09597	0.485605	4.3162	1.59e-05	0.000661409
BNIP3L	1007.3	-1.35315	0.314894	-4.29715	1.73e-05	0.000682923
OASL	103.827	1.4066	0.332753	4.22716	2.37e-05	0.000887454
PC	185.273	-1.22981	0.297984	-4.12708	3.67e-05	0.00128732
SLC1A5	881.471	-1.34959	0.32751	-4.12077	3.78e-05	0.00128732
CD274	100.337	1.42208	0.34747	4.09267	4.26e-05	0.00139056
IFIT3	844.608	1.76053	0.438801	4.01213	6.02e-05	0.00188043
DUSP1	785.214	-1.17208	0.296549	-3.95238	7.74e-05	0.00232131
CCL7	97.0807	3.41075	0.870247	3.91928	8.88e-05	0.00256189
CCR5	188.893	1.748	0.461057	3.79129	0.000149864	0.00391478
CD40	294.8	1.29959	0.343007	3.78881	0.000151372	0.00391478
LAG3	240.61	2.45966	0.646271	3.80593	0.000141271	0.00391478
SERPINA1	319.169	1.78479	0.473286	3.77106	0.000162553	0.00406382
CLECL1	73.2273	1.34109	0.371572	3.60923	0.00030711	0.0071979
PRF1	120.981	2.48891	0.688861	3.61309	0.000302575	0.0071979
TYMP	1210.7	1.23125	0.345927	3.55927	0.000371886	0.00845195
CCND1	7876.29	-3.15176	0.902706	-3.49146	0.000480391	0.0100289
PTEN	379.751	-1.00134	0.286843	-3.4909	0.000481388	0.0100289
WNT5A	56.5984	-1.55727	0.444294	-3.50503	0.000456549	0.0100289
SMAD5	693.333	-0.964359	0.278342	-3.46465	0.000530925	0.010762
CXCL13	214.303	2.10712	0.611308	3.4469	0.000567056	0.0111919
ITGA4	398.038	1.26018	0.36806	3.42384	0.000617427	0.0118736
PIK3R2	519.609	-0.857038	0.251567	-3.4068	0.000657291	0.0123242
IFI6	1418.2	2.10957	0.622822	3.38712	0.000706299	0.0129201
GBP2	1042.37	1.84887	0.554491	3.33435	0.000854989	0.0152677
FCGR2B	350.255	-1.45549	0.437659	-3.32562	0.000882215	0.015305
IFIH1	757.196	1.30998	0.394489	3.32071	0.000897895	0.015305
HMGB1	240.063	-1.02985	0.31252	-3.29531	0.000983142	0.0163857
CXCL9	2241.96	2.52785	0.773407	3.26846	0.00108135	0.0176308
CTAG1B	155.436	4.74274	1.48469	3.19444	0.00140105	0.0223355
IRF1	1008.27	1.485	0.466112	3.18592	0.00144294	0.0223355
OAS3	351.027	1.77922	0.559034	3.18267	0.00145925	0.0223355
RPL23	29913.4	-1.00409	0.318387	-3.15369	0.00161222	0.0241833
KIT	176.295	-2.29241	0.734021	-3.12309	0.00178964	0.0263182
CD70	58.7198	1.52649	0.495714	3.07937	0.00207436	0.0288811
IRF5	201.211	1.26497	0.410885	3.07865	0.00207944	0.0288811
TAP2	780.265	0.994678	0.322274	3.08644	0.00202572	0.0288811
SLC16A1	487.459	-1.96652	0.641859	-3.06379	0.00218555	0.0292707
TLR5	48.412	-0.975341	0.317911	-3.06797	0.00215521	0.0292707
NKG7	736.606	2.29538	0.753936	3.04453	0.00233043	0.0301349
SOCS1	159.284	1.40448	0.460578	3.04938	0.00229318	0.0301349
MX1	363.295	1.89064	0.627973	3.01071	0.00260637	0.0320456
PIAS4	328.737	-0.888822	0.295042	-3.01253	0.0025908	0.0320456
PIK3R1	448.875	-0.74499	0.247112	-3.01479	0.00257161	0.0320456
PUM1	691.033	-0.675257	0.225742	-2.99127	0.00277818	0.033607
PSMB5	1266.47	-0.966587	0.324672	-2.97712	0.00290972	0.0346395
KRAS	450.838	-0.768389	0.258635	-2.97095	0.00296884	0.0347911
PSMB9	951.421	1.50823	0.511402	2.9492	0.00318594	0.0367608
LILRB2	161.455	1.04345	0.354835	2.94065	0.00327523	0.0372185
BBS1	434.64	-2.08182	0.710426	-2.93037	0.00338553	0.0378977
COL4A5	128.987	-2.01601	0.692747	-2.91016	0.00361241	0.0383526
GZMA	211.914	1.82844	0.628637	2.90858	0.00363071	0.0383526
PARP9	585.539	1.36127	0.467977	2.90883	0.00362785	0.0383526
TCF3	547.206	-0.676705	0.23241	-2.91169	0.00359478	0.0383526
CD80	95.8847	1.34277	0.462583	2.90276	0.00369885	0.0385297
HAVCR2	213.171	1.30565	0.452064	2.8882	0.00387459	0.0393279
HCK	328.497	0.862052	0.298523	2.88773	0.00388036	0.0393279
GIMAP4	666.735	1.15431	0.40335	2.86182	0.00421221	0.0410281
IL2RB	382.629	1.45021	0.506537	2.86299	0.0041967	0.0410281
SAMD9	346.755	1.03825	0.362573	2.86355	0.00418916	0.0410281
LILRB4	230.898	1.1369	0.398376	2.85383	0.00431952	0.0415339
ARG1	59.6511	-2.73551	0.961853	-2.844	0.00445514	0.0418857
TSLP	35.3567	-1.22326	0.430256	-2.84309	0.00446781	0.0418857
EXO1	150.402	-1.91843	0.678035	-2.8294	0.00466348	0.0431803
CCL8	137.028	1.36499	0.483122	2.82535	0.0047229	0.0431972
ABCF1	725.297	-1.19367	0.424682	-2.81075	0.00494267	0.0446627
SIGLEC1	193.941	0.93369	0.332698	2.80642	0.0050096	0.0447286
CBLC	17.8096	-1.4219	0.509101	-2.79296	0.00522288	0.0450248
FCGR1A	182.908	1.28829	0.460894	2.7952	0.0051867	0.0450248
JAK3	335.081	1.04979	0.37566	2.79452	0.00519772	0.0450248
BRD4	984.114	-0.636523	0.230572	-2.76063	0.00576908	0.0480757
GZMH	59.9514	1.52925	0.553898	2.76089	0.00576447	0.0480757
MYCT1	57.82	-0.803843	0.291147	-2.76095	0.00576327	0.0480757
SOX11	26.5492	-0.824479	0.299116	-2.75638	0.00584442	0.0481683
IL22RA1	49.4346	-1.82239	0.663012	-2.74864	0.00598422	0.0483578
SELL	118.636	1.31385	0.478114	2.74798	0.00599637	0.0483578
CD300A	161.109	1.1325	0.414281	2.73366	0.00626349	0.0485688
ERBB2	312.146	-1.44098	0.527961	-2.72933	0.00634632	0.0485688
IFI27	5739.13	2.16069	0.790998	2.73161	0.00630265	0.0485688
IL24	15.7258	-0.949208	0.346837	-2.73676	0.0062048	0.0485688
MYC	2400.83	-1.33195	0.486842	-2.73589	0.00622116	0.0485688
POLR2A	1066.19	-0.713223	0.262694	-2.71503	0.0066269	0.0502038
MS4A1	149.257	1.44882	0.538647	2.68974	0.00715067	0.05363
BID	129.805	-0.914065	0.3407	-2.6829	0.00729867	0.0541981
ANGPTL4	259.508	-2.36263	0.889683	-2.65558	0.00791714	0.0576491
FASLG	68.7286	1.5556	0.58546	2.65706	0.00788252	0.0576491
GZMK	372.28	1.88296	0.71167	2.64583	0.00814897	0.0587666
NCAM1	136.728	-2.10047	0.798511	-2.63049	0.00852624	0.0609017
CD44	7634.56	-1.1599	0.444063	-2.61201	0.00900118	0.0635745
CDKN2A	143.638	0.885751	0.339446	2.60941	0.00906996	0.0635745
HRAS	302.056	-0.682562	0.262255	-2.60266	0.00925031	0.0640698
PMS2	323.295	-0.91087	0.35028	-2.6004	0.00931148	0.0640698
IL1A	24.2218	-1.40399	0.540592	-2.59714	0.00940038	0.0640935
HLA-DQA2	200.309	-2.61509	1.00909	-2.59152	0.00955526	0.0645625
NFIL3	356.669	-0.913193	0.353536	-2.58302	0.00979385	0.0655838
DTX3L	922.444	1.07168	0.416329	2.57412	0.0100494	0.0666996
CD7	93.6557	1.1008	0.428271	2.57033	0.0101602	0.0668436
ERO1A	761.812	-1.14399	0.445648	-2.56702	0.0102575	0.066897
FPR3	345.733	1.06055	0.414265	2.56008	0.0104647	0.0676596
CSF3	8.46205	-1.03354	0.405605	-2.54815	0.0108297	0.0682362
OAS2	747.147	1.4772	0.578464	2.55366	0.0106597	0.0682362
SPP1	3779.25	-3.16406	1.24169	-2.5482	0.0108282	0.0682362
TNFRSF14	2225.3	-1.43417	0.563453	-2.54532	0.0109178	0.0682362
GZMB	62.6877	1.72091	0.676881	2.54241	0.011009	0.0682373
CYBB	1135.06	0.996724	0.392943	2.53656	0.0111947	0.06882
MAGEA4	45.9643	2.08246	0.82572	2.522	0.0116691	0.0705791
MB21D1	134.14	0.652913	0.258603	2.52477	0.0115772	0.0705791
FCGR3A/B	546.347	1.49263	0.593865	2.51341	0.011957	0.0711727
PARP12	311.884	1.18498	0.471165	2.515	0.0119033	0.0711727
CTSW	130.741	1.65143	0.664394	2.48562	0.0129325	0.0763731
FCN1	124.141	0.837465	0.338212	2.47615	0.0132807	0.0766286
NCR1	43.2982	0.795244	0.320901	2.47816	0.0132063	0.0766286
TWF1	1269.61	-1.0804	0.436329	-2.47611	0.0132823	0.0766286
CD45RB	100.787	0.920617	0.372614	2.4707	0.0134849	0.0772037
C5	68.2044	-0.982806	0.398775	-2.46457	0.013718	0.077943
PSMB10	602.872	0.777666	0.317709	2.44773	0.0143758	0.0810663
IFIT1	242.732	1.48381	0.607373	2.443	0.0145656	0.0815238
SAMSN1	244.275	0.737231	0.302597	2.43635	0.0148364	0.0824246
IRF3	543.129	-0.641448	0.264009	-2.42965	0.0151134	0.0827378
LGALS9	356.636	0.723917	0.297874	2.43028	0.0150873	0.0827378
IRF4	1311.92	-1.52322	0.630332	-2.41653	0.0156692	0.0851589
ZEB2	2116.11	-0.8821	0.367148	-2.40257	0.0162802	0.087843
HLA-DPA1	3105.25	1.08594	0.452561	2.39954	0.0164156	0.0879408
IL21R	31.4579	1.05069	0.43881	2.3944	0.0166475	0.0885507
OAS1	542.095	1.37237	0.575113	2.38626	0.0170209	0.0898993
DKK1	24.3887	-1.09457	0.460057	-2.37921	0.01735	0.0909965
CD2	199.322	1.05126	0.443217	2.37188	0.017698	0.0911256
CLEC4E	15.8902	-0.919473	0.387259	-2.37431	0.0175818	0.0911256
HK2	270.968	-1.23383	0.52038	-2.37102	0.0177391	0.0911256
CHUK	442.576	-0.681337	0.288426	-2.36226	0.018164	0.0917938
ITGA2	208.756	-1.45992	0.619057	-2.3583	0.0183588	0.0917938
ITGAL	311.74	1.18683	0.501889	2.36472	0.0180438	0.0917938
LDHA	6252.24	-1.00944	0.427727	-2.36001	0.0182743	0.0917938
CCL5	1057.62	1.57771	0.671379	2.34995	0.0187758	0.0920382
CTLA4	108.595	1.02474	0.436027	2.35018	0.0187641	0.0920382
P4HA1	386.486	-1.08282	0.460488	-2.35146	0.0187	0.0920382
GIMAP6	159.353	0.91591	0.392393	2.33416	0.0195871	0.0953918
POLD1	120.882	-0.923552	0.397443	-2.32373	0.0201397	0.0974502
MSH2	430.112	-0.85281	0.36762	-2.31981	0.020351	0.0978414
IER3	778.92	-2.02376	0.8737	-2.31631	0.0205415	0.0981282
MXI1	426.486	-1.0955	0.475001	-2.30631	0.0210935	0.100127
JAK1	660.882	-0.610655	0.265089	-2.30358	0.0212461	0.100216
UBE2T	163.762	-1.10784	0.481413	-2.30122	0.0213794	0.100216
IL11RA	244.875	-1.16154	0.50633	-2.29404	0.021788	0.101497
LAIR1	298.134	0.885878	0.387239	2.28768	0.0221563	0.102576
ALDOC	219.688	-1.32194	0.579581	-2.28085	0.0225575	0.102707
CD45RO	603.46	1.03869	0.455523	2.28021	0.0225955	0.102707
GBP1	860.796	1.57814	0.691977	2.28062	0.0225707	0.102707
PDCD1LG2	103.393	0.89839	0.394912	2.27491	0.0229113	0.103515
AREG	102.88	-2.07759	0.914281	-2.27237	0.0230639	0.103581
HDC	173.39	-0.800349	0.352938	-2.26768	0.0233489	0.104236
WNT7B	15.7298	-1.24801	0.553347	-2.25539	0.0241091	0.106993
MELK	166.731	-1.32143	0.590399	-2.23819	0.0252087	0.111215
IL4	8.02158	-0.88729	0.39862	-2.2259	0.0260206	0.113857
LILRA1	40.1866	0.798165	0.358798	2.22456	0.0261111	0.113857
FLT1	186.135	-0.927581	0.417514	-2.22168	0.0263052	0.11404
ARID1A	621.425	-0.42921	0.194185	-2.21031	0.0270836	0.11674
IL10RA	481.165	0.947839	0.430183	2.20334	0.027571	0.117862
LDHB	5567.38	-1.11912	0.508205	-2.2021	0.0276582	0.117862
IFNG	69.7968	1.01173	0.460355	2.19772	0.0279693	0.118514
APC	819.56	-0.959224	0.437546	-2.19228	0.0283594	0.119492
BRCA1	178.855	-0.985669	0.451066	-2.1852	0.0288744	0.120982
HNF1A	10.4159	-0.807077	0.370886	-2.17608	0.0295493	0.121899
STAT1	2371.94	1.18581	0.545034	2.17566	0.0295808	0.121899
TPI1	3133.36	-0.989673	0.454798	-2.17607	0.0295499	0.121899
IRF8	407.105	0.963289	0.4442	2.16859	0.0301135	0.122745
MMP7	70.0411	1.72914	0.797163	2.16912	0.0300735	0.122745
IHH	17.6943	-0.81851	0.379103	-2.15907	0.0308449	0.125047
AKT1	2257.19	-0.691503	0.321794	-2.1489	0.0316424	0.12565
CXCR3	69.447	1.0961	0.509676	2.15057	0.03151	0.12565
EDN1	49.5332	-1.27051	0.591311	-2.14863	0.0316639	0.12565
TICAM1	127.808	-0.718028	0.33382	-2.15094	0.0314808	0.12565
GHR	38.0346	-0.787023	0.366781	-2.14575	0.0318926	0.125892
IFNAR1	518.438	-0.75966	0.354542	-2.14265	0.0321409	0.126208
SERPINH1	475.897	-0.851176	0.397945	-2.13893	0.0324414	0.126293
TP53	861.573	-1.0233	0.478577	-2.13821	0.0324994	0.126293
ANGPT2	75.9609	-0.999151	0.467768	-2.136	0.0326796	0.126338
RPS6KB1	309.424	-0.688371	0.322706	-2.13312	0.0329149	0.126596
APOE	13464.2	-1.11428	0.5246	-2.12405	0.0336657	0.128169
RPTOR	295.17	-0.655091	0.308403	-2.12414	0.0336585	0.128169
CD19	53.1162	0.897937	0.4234	2.12078	0.0339403	0.128562
KDR	185.664	-1.02819	0.486407	-2.11385	0.0345277	0.130129
KLRK1	286.032	1.41192	0.669026	2.11041	0.0348235	0.130588
ITPK1	1267.66	-1.30594	0.623036	-2.0961	0.0360736	0.133937
SDHA	1230.34	-0.870295	0.415196	-2.09611	0.0360727	0.133937
NRAS	912.435	-1.03148	0.494018	-2.08793	0.0368037	0.135974
PPARGC1B	223.087	-0.618701	0.297612	-2.07888	0.037628	0.138338
CENPF	275.015	-1.25809	0.606955	-2.07278	0.0381925	0.13905
ENO1	6289.16	-0.983781	0.474589	-2.07291	0.0381805	0.13905
FGF13	70.1818	1.1557	0.558146	2.07061	0.0383956	0.1391
TGFBR2	746.564	-0.77187	0.373124	-2.06867	0.0385769	0.1391
RNLS	217.853	1.36245	0.662036	2.05797	0.0395928	0.142079
BRIP1	266.813	-1.272	0.621745	-2.04586	0.0407705	0.142736
CCL2	1344.67	0.958271	0.469374	2.04159	0.0411918	0.142736
HERC6	177.843	1.28231	0.628423	2.04052	0.0412984	0.142736
PPARG	84.7323	-0.986579	0.481433	-2.04925	0.0404374	0.142736
RIPK1	354.991	-0.842577	0.412285	-2.04368	0.0409853	0.142736
TNFRSF9	145.807	1.31295	0.641242	2.0475	0.0406088	0.142736
ZAP70	209.532	1.16563	0.569429	2.04702	0.0406566	0.142736
NRDE2	319.123	-0.741564	0.361897	-2.0491	0.040452	0.142736
GNG4	28.7848	-1.18929	0.584039	-2.03632	0.0417185	0.142872
NDUFA4L2	119.453	-0.944137	0.463467	-2.03712	0.0416383	0.142872
PARP4	731.613	-0.893145	0.440963	-2.02544	0.0428218	0.145983
GAS1	247.08	-1.01742	0.503603	-2.02028	0.0433546	0.147066
ITGB8	619.407	-1.67613	0.830355	-2.01857	0.0435315	0.147066
BRD3	455.267	-0.561424	0.278552	-2.01551	0.043851	0.14725
HMGA1	1896.64	-0.959986	0.476587	-2.01429	0.0439786	0.14725
CD27	270.849	1.25367	0.625224	2.00516	0.0449465	0.147371
FLNB	724.203	-1.13515	0.564469	-2.011	0.0443259	0.147371
FOXP3	69.0444	0.817232	0.407546	2.00525	0.0449359	0.147371
NOS2	9.07041	-0.802004	0.400066	-2.00468	0.0449972	0.147371
RAD51	118.28	-0.848141	0.422844	-2.0058	0.0448775	0.147371
CCL4	326.071	1.25422	0.626299	2.00259	0.0452208	0.147459
BAX	926.228	-0.719259	0.360651	-1.99434	0.0461154	0.147806
CD74	18727.5	0.779529	0.390667	1.99538	0.0460014	0.147806
ICOS	52.2291	0.89386	0.447575	1.99712	0.0458122	0.147806
KIR3DL1	17.3966	-0.722171	0.361414	-1.99818	0.0456968	0.147806
CD14	804.101	0.776823	0.39169	1.98326	0.0473382	0.148647
CD8A	372.717	1.50505	0.760943	1.97788	0.0479425	0.148647
CXCL6	11.2809	-0.794114	0.402011	-1.97535	0.048228	0.148647
E2F3	437.255	-1.04949	0.531915	-1.97303	0.0484917	0.148647
IL2RG	428.35	1.18387	0.599488	1.97479	0.0482916	0.148647
IL34	84.1865	-1.41524	0.715958	-1.97671	0.0480747	0.148647
NFATC2	413.494	1.15311	0.584609	1.97245	0.0485581	0.148647
PTPRC	292.349	0.814625	0.410508	1.98443	0.0472078	0.148647
WDR76	137.549	-0.545024	0.274221	-1.98754	0.0468629	0.148647
PSMC4	689.306	-0.734902	0.371784	-1.97669	0.048077	0.148647
TLK2	356.118	-0.597274	0.302192	-1.97648	0.0481008	0.148647
LCK	221.022	1.09995	0.558583	1.96918	0.048932	0.149183
ITGB2	1287.58	0.740182	0.37682	1.96428	0.0494971	0.150295
ACVR1C	30.7879	-1.02425	0.522439	-1.96052	0.049935	0.151013
ROCK1	422.359	-0.544274	0.278422	-1.95485	0.0506009	0.152412
CD58	111.339	-0.678602	0.348116	-1.94935	0.0512532	0.153759
TNFRSF1B	318.437	0.676265	0.348382	1.94116	0.0522389	0.156092
FPR1	132.706	0.886879	0.45735	1.93917	0.0524806	0.156192
SRP54	488.267	-0.872073	0.450639	-1.93519	0.0529666	0.157016
BLK	17.9691	0.875922	0.453715	1.93055	0.0535383	0.158085
CD3D	344.969	1.21644	0.632557	1.92306	0.054473	0.159031
CLEC7A	180.528	0.685161	0.35632	1.92288	0.0544947	0.159031
SGK1	2195.21	-1.11733	0.580312	-1.9254	0.0541793	0.159031
HLA-B	22431	0.876968	0.45698	1.91905	0.0549779	0.15982
NLRC5	418.965	0.956301	0.499257	1.91545	0.0554357	0.160528
JAG2	25.778	-0.860069	0.449737	-1.91238	0.0558272	0.16104
HLA-DPB1	3419.89	0.885868	0.464143	1.90861	0.0563125	0.1612
TAP1	1879.49	0.974173	0.509978	1.91023	0.0561039	0.1612
COL11A1	159.889	-1.69488	0.893034	-1.89789	0.0577108	0.164575
CD247	69.1064	1.254	0.661382	1.89603	0.0579563	0.164648
HDAC5	350.432	-0.476018	0.251594	-1.89201	0.0584899	0.164915
RASAL1	34.5687	-1.24424	0.657061	-1.89365	0.0582714	0.164915
SBNO2	491.954	-0.409324	0.218233	-1.87563	0.0607063	0.169887
TNFSF10	675.704	0.996996	0.531397	1.87618	0.0606304	0.169887
GLI1	34.4343	-1.05952	0.565638	-1.87314	0.0610497	0.170213
CD38	114.49	1.03321	0.555295	1.86065	0.0627943	0.174429
CD48	286.434	0.974305	0.52532	1.85469	0.0636404	0.176127
RUNX3	194.531	1.04339	0.564719	1.84762	0.0646568	0.178282
BRCA2	211.974	-0.949232	0.514826	-1.84379	0.0652136	0.179158
MAPK10	27.7447	-0.673903	0.366063	-1.84095	0.0656293	0.179642
NOTCH2	1172.19	-0.44474	0.241936	-1.83825	0.0660253	0.180069
CD45RA	78.0696	0.806602	0.439827	1.83391	0.0666675	0.181162
IFNGR1	1217.34	-0.467615	0.255389	-1.83099	0.0671019	0.181684
APOL6	815.593	0.783201	0.428135	1.82933	0.0673499	0.181699
MLH1	435.118	-0.612308	0.335269	-1.82632	0.0678024	0.182264
PFKM	240.894	-0.818828	0.448976	-1.82377	0.068187	0.182644
LTBP1	369.808	-1.15569	0.635343	-1.819	0.0689109	0.183926
CXCR6	91.8822	1.00245	0.55435	1.80833	0.0705552	0.187647
RAD51C	159.674	-0.641925	0.356074	-1.80278	0.0714222	0.189101
SOX10	3409.2	-1.20908	0.671109	-1.80161	0.0716061	0.189101
ARG2	56.9173	-0.991995	0.551845	-1.7976	0.0722412	0.190108
CSF3R	98.8197	0.65003	0.36258	1.79279	0.0730067	0.190642
GPSM3	533.597	0.455309	0.254144	1.79154	0.0732064	0.190642
MSH6	235.926	-0.662479	0.369678	-1.79204	0.0731262	0.190642
PDCD1	99.5707	0.821581	0.459031	1.78981	0.0734838	0.190702
ERCC3	785.142	-0.537315	0.301079	-1.78463	0.0743215	0.192211
RB1	749.027	-0.674144	0.378101	-1.78297	0.0745907	0.192244
VHL	90.1854	-0.43359	0.24413	-1.77606	0.0757229	0.194494
CXCL3	34.2737	-0.701298	0.396752	-1.7676	0.0771284	0.196089
VEGFB	714.211	-0.568495	0.321552	-1.76797	0.0770657	0.196089
SF3A1	900.636	-0.575404	0.325312	-1.76878	0.0769312	0.196089
FOSL1	199.55	-1.42216	0.806225	-1.76398	0.0777354	0.196302
MICA	232.81	-0.784207	0.444552	-1.76404	0.0777256	0.196302
BNIP3	137.817	-0.612012	0.348473	-1.75627	0.0790427	0.198268
KIF2C	153.252	-1.04723	0.595962	-1.75721	0.0788827	0.198268
TYMS	679.366	-0.94301	0.53761	-1.75408	0.0794168	0.198542
CASP9	136.503	-0.553207	0.315882	-1.75131	0.0798928	0.199069
ALDOA	7163.99	-0.528579	0.302256	-1.74878	0.0803286	0.199491
CEACAM3	32.5275	-1.22065	0.699913	-1.744	0.0811583	0.200887
CD28	127.969	0.662276	0.380678	1.73973	0.0819066	0.202072
EIF5AL1	15.761	-0.663396	0.382533	-1.73422	0.0828794	0.203802
CD5	132.497	0.718725	0.41554	1.72962	0.0836988	0.205068
FCRL2	45.2835	0.920657	0.532707	1.72826	0.0839412	0.205068
WNT2B	45.5146	-0.987993	0.572523	-1.72568	0.0844046	0.205531
BBC3	383.31	-0.907374	0.528285	-1.71758	0.0858727	0.208278
CD86	100.243	0.654784	0.381486	1.7164	0.0860884	0.208278
GOT1	351.629	-0.405293	0.236544	-1.71339	0.0866402	0.208939
UBA7	345.392	0.692539	0.407075	1.70126	0.0888951	0.21369
IL17A	9.64337	-0.826699	0.486401	-1.69962	0.0892016	0.213742
HDAC3	438.841	-0.366229	0.215876	-1.69648	0.0897953	0.214479
TNF	148.534	0.840078	0.496908	1.69061	0.090911	0.216455
HES1	565.383	-0.694123	0.411688	-1.68604	0.0917876	0.21785
CMKLR1	322.013	0.422293	0.251043	1.68216	0.0925383	0.218251
MRPL19	411.698	-0.506666	0.301185	-1.68224	0.0925217	0.218251
TPSAB1/B2	1256.77	-1.74248	1.0429	-1.67079	0.0947624	0.222796
GLUD1	1172.05	-0.503667	0.303772	-1.65804	0.0973087	0.228067
IL15	89.6015	0.783251	0.473825	1.65304	0.0983231	0.229727
LY96	696.255	0.756853	0.45866	1.65014	0.0989145	0.230391
ELOB	93.7494	-0.562859	0.341532	-1.64804	0.0993444	0.230676
RAD50	702.018	-0.450587	0.273903	-1.64506	0.099957	0.231382
C1QA	1287.39	0.853483	0.520823	1.63872	0.101272	0.232275
CD96	153.791	0.851617	0.519074	1.64065	0.100871	0.232275
PFKFB3	197.341	-0.699987	0.426912	-1.63965	0.101078	0.232275
ICAM3	372.199	-0.499946	0.305364	-1.63721	0.101586	0.232285
CD3E	119.786	0.940362	0.580535	1.61982	0.105271	0.239979
CD8B	126.567	1.21614	0.751509	1.61827	0.105605	0.240012
TIGIT	199.582	1.02052	0.634683	1.60792	0.107853	0.244379
EGFR	189.212	-1.48932	0.927969	-1.60492	0.108511	0.245014
PLA2G2A	417.572	1.14075	0.712651	1.60072	0.10944	0.245014
SMAP1	574.449	-0.361021	0.225288	-1.60249	0.109048	0.245014
TCL1A	34.4332	0.768832	0.48009	1.60143	0.109281	0.245014
MTOR	358.116	-0.455378	0.287515	-1.58384	0.113229	0.252743
NECTIN2	533.326	-0.527794	0.334405	-1.57831	0.114495	0.254811
MAP3K12	72.9552	-0.687877	0.436582	-1.5756	0.115119	0.254859
S100A12	15.2868	-0.569992	0.36184	-1.57526	0.115196	0.254859
DNMT1	724.192	-0.538339	0.342128	-1.5735	0.115603	0.255006
ANLN	342.554	-0.8878	0.565692	-1.56941	0.116553	0.256349
B2M	33102.1	0.738052	0.473025	1.56028	0.118694	0.258841
CDC20	132.126	-0.830871	0.532815	-1.5594	0.118902	0.258841
CDKN1A	652.956	-0.861991	0.551662	-1.56254	0.118162	0.258841
PALMD	204.338	-1.06129	0.680883	-1.5587	0.119067	0.258841
DNAJC14	412.745	-0.600682	0.387192	-1.55138	0.12081	0.261872
IRF7	404.141	0.691146	0.446029	1.54955	0.121249	0.262065
DDB2	537.444	-0.602063	0.390122	-1.54327	0.122766	0.26313
DTX4	93.7418	-0.664098	0.430352	-1.54315	0.122794	0.26313
IL32	746.027	0.78933	0.511248	1.54393	0.122606	0.26313
HELLS	318.249	-0.690337	0.44939	-1.53617	0.124498	0.265265
RELA	516.381	-0.406645	0.264532	-1.53723	0.124238	0.265265
RPL7A	17378.4	-0.625256	0.408234	-1.53161	0.125618	0.266894
TNFSF13	127.186	0.427553	0.280159	1.52611	0.126982	0.26903
ITGA1	187.566	-0.616992	0.405309	-1.52228	0.12794	0.269537
MS4A2	45.5889	-1.23067	0.808242	-1.52265	0.127845	0.269537
API5	1449.12	-0.451887	0.298055	-1.51612	0.129489	0.272035
AXIN1	172.685	-0.470759	0.311107	-1.51318	0.130235	0.272487
TRIM21	228.904	0.664097	0.4391	1.51241	0.13043	0.272487
SPIB	66.7219	0.663041	0.438901	1.51068	0.130869	0.272644
TPM1	750.412	-0.772977	0.513782	-1.50448	0.132457	0.275187
MLANA	11333.4	-1.44682	0.962696	-1.50289	0.132868	0.27528
CD3G	71.3163	0.757832	0.505109	1.50033	0.133528	0.275884
TGFB2	51.9596	-0.698027	0.469693	-1.48613	0.137244	0.282008
TLR2	246.358	0.510875	0.343516	1.48719	0.136964	0.282008
ITGA6	634.805	0.679772	0.458525	1.48252	0.138202	0.283201
TNKS	572.242	-0.550089	0.372645	-1.47617	0.139897	0.285117
WNT4	41.7228	-0.993102	0.672707	-1.47628	0.139869	0.285117
CRABP2	239.335	-1.12722	0.764918	-1.47365	0.140576	0.285724
PCK2	290.008	-0.489876	0.333076	-1.47076	0.141355	0.285925
WNT11	28.2161	-0.873828	0.594255	-1.47046	0.141437	0.285925
CDH5	151.121	-0.543042	0.374841	-1.44873	0.147414	0.297206
TBP	393.255	-0.465616	0.321872	-1.44659	0.148013	0.297613
CCR2	117.956	0.495582	0.343831	1.44135	0.149485	0.299075
HLA-DOA	92.6975	0.619321	0.429736	1.44117	0.149538	0.299075
MRE11	569.419	-0.290756	0.202624	-1.43495	0.151302	0.301799
CCL18	83.8811	-0.839411	0.586642	-1.43087	0.152466	0.303315
IL2	26.7859	-0.519932	0.36429	-1.42725	0.153508	0.304526
TTC30A	120.408	-0.634317	0.444843	-1.42593	0.153887	0.304526
VCAM1	320.331	0.749514	0.527141	1.42185	0.155071	0.305661
OAZ1	5937.01	-0.452733	0.31857	-1.42114	0.155276	0.305661
FGF9	8.67974	-0.57759	0.407353	-1.41791	0.156217	0.30671
TBX21	35.1071	0.461097	0.325873	1.41496	0.157081	0.3076
IL16	632.277	0.567725	0.401703	1.4133	0.157569	0.307752
NECTIN1	421.597	-1.15738	0.819864	-1.41168	0.158045	0.30788
C5AR1	23.8139	-0.467005	0.331152	-1.41024	0.158468	0.307904
GZMM	45.0337	0.614444	0.436364	1.4081	0.159102	0.308337
FADD	212.27	-0.561442	0.399819	-1.40424	0.160247	0.309567
ITGAE	258.186	-0.506318	0.360835	-1.40318	0.160562	0.309567
C1QB	1425.77	0.906999	0.649039	1.39745	0.162279	0.311276
COL17A1	565.165	-2.20027	1.57391	-1.39796	0.162125	0.311276
IL33	321.342	0.941112	0.674392	1.3955	0.162866	0.311605
G6PD	387.608	-0.367069	0.264262	-1.38904	0.164822	0.314545
CXorf36	107.026	-0.586595	0.423345	-1.38562	0.165863	0.315729
NF1	357.161	-0.496139	0.360244	-1.37723	0.168441	0.31955
OTOA	17.64	-0.502676	0.365232	-1.37632	0.168722	0.31955
LIF	803.286	1.34828	0.98228	1.37261	0.169875	0.320922
LAMC2	57.2273	-0.995579	0.733047	-1.35814	0.17442	0.328681
BATF3	125.358	0.749463	0.554789	1.3509	0.176728	0.330539
EZH2	355.32	-0.498499	0.36867	-1.35216	0.176325	0.330539
SH2D1A	146.094	0.827352	0.611976	1.35194	0.176396	0.330539
CD84	415.289	0.564192	0.419806	1.34394	0.178969	0.333897
PTGER4	192.345	0.605374	0.451892	1.33964	0.180362	0.335661
BTLA	34.7213	0.652576	0.488895	1.3348	0.181942	0.337764
CD209	98.3024	0.567971	0.426595	1.33141	0.183056	0.338992
PVR	193.884	-0.576041	0.433634	-1.3284	0.184045	0.339984
BIRC5	512.977	-0.673165	0.514454	-1.3085	0.190703	0.351418
EPCAM	27.7206	-0.53994	0.41309	-1.30708	0.191187	0.351447
MFNG	87.1763	0.41256	0.316719	1.3026	0.19271	0.35338
IRF9	801.617	0.646559	0.497786	1.29887	0.193989	0.354857
ENTPD1	569.291	-0.539843	0.416237	-1.29696	0.194645	0.355191
MS4A6A	162.928	0.50585	0.391631	1.29165	0.196479	0.357668
MET	1576.43	-1.30264	1.01288	-1.28607	0.198418	0.360323
EGR1	1921.95	-0.671879	0.525546	-1.27844	0.201095	0.362796
HDAC4	193.834	-0.708826	0.555209	-1.27668	0.201715	0.362796
NEIL1	103.693	-0.478682	0.37472	-1.27744	0.201448	0.362796
PRR5	102.342	-0.539194	0.421317	-1.27978	0.200622	0.362796
EOMES	152.546	0.79411	0.623494	1.27365	0.202789	0.363329
MAGEC1	182.268	-1.88345	1.47941	-1.27311	0.20298	0.363329
ATF3	156.065	0.436118	0.345104	1.26373	0.206326	0.36844
ITGAM	88.174	-0.315441	0.250552	-1.25898	0.208036	0.370611
BCL6B	65.3808	-0.437838	0.348461	-1.25649	0.208939	0.371039
STAT4	125.959	0.563461	0.448763	1.25559	0.209266	0.371039
CD36	272.046	-0.726073	0.579261	-1.25345	0.210043	0.371442
STK11IP	117.142	-0.379033	0.302685	-1.25224	0.210484	0.371442
MMRN2	152.113	-0.57418	0.462824	-1.2406	0.214753	0.377326
NT5E	171.751	0.573582	0.462735	1.23955	0.215143	0.377326
PIK3CA	359.636	-0.470701	0.379889	-1.23905	0.215327	0.377326
TIE1	111.893	-0.422766	0.341601	-1.2376	0.215864	0.377384
TNFSF9	28.046	-0.369997	0.301298	-1.22801	0.219443	0.382749
FANCA	163.168	-0.56017	0.459015	-1.22037	0.222323	0.385536
PDGFRB	701.662	-0.614048	0.502569	-1.22182	0.221776	0.385536
GUSB	454.968	-0.422106	0.346076	-1.21969	0.222583	0.385536
CD163	627.384	0.392189	0.32357	1.21207	0.225486	0.388768
PSMB8	1247.01	0.517678	0.426693	1.21323	0.225041	0.388768
CXCR2	20.882	-0.481765	0.398123	-1.21009	0.226244	0.389182
CCL22	83.9089	-0.941083	0.781053	-1.20489	0.228246	0.389942
CX3CL1	492.462	-0.623174	0.517192	-1.20492	0.228235	0.389942
PDGFA	94.5012	-0.430103	0.356259	-1.20728	0.227326	0.389942
CSF1R	700.786	0.375223	0.314005	1.19496	0.232103	0.394733
ESR1	40.7429	-0.402978	0.33721	-1.19504	0.232072	0.394733
TNFSF18	24.6075	0.52641	0.443325	1.18741	0.235064	0.398864
LTB	192.152	0.715301	0.60392	1.18443	0.236242	0.399959
CES3	16.8061	-0.548912	0.465699	-1.17868	0.238524	0.402006
TLR7	60.707	0.585748	0.496493	1.17977	0.238091	0.402006
CDK2	7973.36	-1.10708	0.947281	-1.16869	0.242527	0.407836
CLEC14A	143.917	-0.486625	0.417857	-1.16457	0.244192	0.408804
NFKB1	847.355	-0.346368	0.29739	-1.1647	0.244142	0.408804
ADORA2A	69.2656	-0.321965	0.277171	-1.16161	0.245394	0.409901
LRRC32	179.013	-0.425816	0.36721	-1.1596	0.246213	0.410355
KLRD1	97.3277	0.698007	0.604541	1.15461	0.248251	0.411921
LAMA1	189.165	0.935467	0.80932	1.15587	0.247735	0.411921
ULBP2	31.3739	-0.360482	0.313211	-1.15092	0.249764	0.413516
IL2RA	82.8244	0.483077	0.425145	1.13626	0.255846	0.422653
TWIST2	9.70969	-0.447512	0.395043	-1.13282	0.257291	0.423262
TBC1D10B	224.341	-0.288748	0.254922	-1.13269	0.257343	0.423262
FGF18	33.4347	0.458344	0.405209	1.13113	0.258001	0.423415
CDC25C	33.5748	-0.610191	0.540928	-1.12805	0.2593	0.423865
SELE	107.418	0.645986	0.572785	1.1278	0.259405	0.423865
IL1RN	64.4408	-0.830144	0.745971	-1.11284	0.265779	0.433335
FAS	65.1575	-0.348326	0.316177	-1.10168	0.270601	0.439287
FSTL3	146.644	-0.890593	0.808127	-1.10205	0.270442	0.439287
CSF2	26.9763	-0.349064	0.318369	-1.09641	0.272898	0.442059
ZEB1	335.663	-0.492448	0.4511	-1.09166	0.274982	0.444476
RELN	30.7442	-0.653131	0.606787	-1.07638	0.281759	0.453475
TNFRSF1A	840.6	-0.294868	0.273847	-1.07676	0.281588	0.453475
DEPTOR	172.899	0.456238	0.425619	1.07194	0.283748	0.455698
JAG1	819.38	-0.803069	0.750414	-1.07017	0.284544	0.456
TRAT1	138.028	0.615465	0.576341	1.06788	0.285573	0.456674
C7	87.1757	-0.522989	0.491707	-1.06362	0.287501	0.456806
CASP3	363.827	-0.332183	0.312205	-1.06399	0.287332	0.456806
HK1	769.783	-0.426679	0.401278	-1.0633	0.287646	0.456806
PIK3CG	171.363	0.377932	0.355763	1.06232	0.288092	0.456806
PNOC	8.60485	-0.49242	0.464926	-1.05914	0.289537	0.457164
SIRPB2	52.2389	0.355316	0.335241	1.05988	0.289198	0.457164
RICTOR	682.48	-0.364036	0.346557	-1.05043	0.293518	0.462476
WNT10A	49.9383	-0.710112	0.677792	-1.04768	0.294784	0.463497
CTNNB1	11956.2	-0.681625	0.654624	-1.04125	0.297761	0.467199
HLA-DRA	7889.72	0.491523	0.474081	1.03679	0.299834	0.469469
DLL1	78.3119	-0.606597	0.588382	-1.03096	0.30256	0.472751
CCL21	348.443	-0.894726	0.8812	-1.01535	0.309939	0.48227
TMEM173	405.501	0.426168	0.419234	1.01654	0.309372	0.48227
CD79B	31.0127	0.455742	0.44972	1.01339	0.310873	0.482722
CCNE1	138.782	-0.50664	0.501203	-1.01085	0.312089	0.483609
BAMBI	1303.64	-0.886194	0.878098	-1.00922	0.312869	0.483819
CXCL12	453.769	-0.608601	0.605913	-1.00444	0.315168	0.486371
CPA3	257.454	-0.90807	0.909375	-0.998564	0.318006	0.489742
CD4	166.668	0.39408	0.396721	0.993342	0.320543	0.492638
CD6	84.2796	0.492214	0.499184	0.986036	0.324116	0.493635
CDKN1C	520.417	-0.861862	0.8754	-0.984535	0.324852	0.493635
DAB2	797.523	-0.44868	0.455575	-0.984867	0.32469	0.493635
FAM30A	37.5079	-0.694787	0.706121	-0.983949	0.325141	0.493635
FZD8	54.3718	-0.402213	0.406064	-0.990518	0.321921	0.493635
PF4	20.0779	-0.487365	0.493027	-0.988516	0.3229	0.493635
TLR8	113.83	0.482967	0.49222	0.981202	0.326493	0.494686
TNFSF12	404.199	-0.312888	0.319589	-0.979033	0.327564	0.495308
ITGAV	2029.99	-0.442065	0.453827	-0.974083	0.330016	0.498011
SYK	192.746	0.325908	0.338536	0.962697	0.3357	0.505572
HLA-DMB	573.96	0.45267	0.471113	0.960851	0.336627	0.505952
CDK6	392.094	0.274427	0.288438	0.951424	0.341389	0.512084
S100A9	503.085	-0.69991	0.741278	-0.944193	0.345071	0.516573
CCNB1	628.097	-0.502376	0.537404	-0.93482	0.349881	0.520735
IL18	277.179	0.522774	0.559285	0.934718	0.349934	0.520735
UBE2C	314.268	-0.47416	0.506383	-0.936365	0.349085	0.520735
EIF2B4	166.116	-0.268727	0.289528	-0.928157	0.353326	0.524742
ARNT2	1024.62	0.689387	0.745461	0.924779	0.355081	0.526305
IFNA1	9.75933	-0.337852	0.367213	-0.920045	0.35755	0.528919
BIRC3	47.5772	0.456291	0.498951	0.9145	0.360454	0.529461
CST2	23.4752	0.406669	0.444297	0.915308	0.36003	0.529461
LYZ	6900.62	0.591435	0.646068	0.915438	0.359962	0.529461
SLC11A1	32.6414	0.633705	0.693364	0.913957	0.360739	0.529461
SNCA	2112.08	-0.699028	0.766367	-0.912132	0.361699	0.529833
TNFSF13B	91.9397	0.267975	0.294232	0.910761	0.362422	0.529856
TRAF1	585.038	0.578491	0.637658	0.907212	0.364295	0.531558
CXCL5	11.4356	-0.34868	0.385205	-0.905181	0.365369	0.532092
TMUB2	414.063	-0.263545	0.291753	-0.903315	0.366359	0.532498
TGFB3	205.156	0.456591	0.508198	0.89845	0.368946	0.535221
PIK3R5	191.506	0.387501	0.433175	0.894561	0.371022	0.537194
CCL14	460.008	-0.693265	0.776625	-0.892664	0.372037	0.537298
SIGLEC5	18.8908	-0.33187	0.372156	-0.891751	0.372527	0.537298
IKBKB	313.753	-0.243327	0.275593	-0.882922	0.377278	0.543107
F2RL1	59.1365	-0.60498	0.690892	-0.87565	0.38122	0.54773
THBD	103.035	-0.52045	0.595323	-0.874232	0.381992	0.54779
EIF2AK2	662.755	0.399419	0.459663	0.868937	0.384881	0.55088
COMP	230.298	-0.572393	0.669235	-0.855295	0.392388	0.556174
FCGRT	1046.29	0.20962	0.244703	0.856629	0.39165	0.556174
FYN	936.019	-0.291336	0.341152	-0.853975	0.393119	0.556174
PTCD2	132.01	-0.314916	0.368132	-0.855441	0.392307	0.556174
REN	9.63399	-0.378965	0.440851	-0.85962	0.389998	0.556174
SIGLEC8	16.1371	-0.498307	0.581502	-0.856932	0.391482	0.556174
TAPBPL	312.853	0.343002	0.402207	0.852799	0.393771	0.556174
TNFRSF17	36.3108	-0.596345	0.70526	-0.845568	0.397794	0.5608
TNFRSF8	14.7476	0.31001	0.370157	0.837509	0.402307	0.566098
ICAM5	16.9789	-0.306685	0.37213	-0.824135	0.409863	0.57565
PTGS2	23.1063	-0.277751	0.338369	-0.820855	0.411729	0.57719
KAT2B	1424.2	-0.412704	0.509908	-0.80937	0.418302	0.583135
KIR2DL3	25.6489	-0.272023	0.335116	-0.811728	0.416948	0.583135
TNFAIP3	125.58	0.230983	0.285068	0.810273	0.417783	0.583135
IRF2	372.962	0.161462	0.200873	0.8038	0.421513	0.58652
CD276	1694.29	-0.455214	0.567838	-0.801663	0.422748	0.58715
EIF4EBP1	928.706	-0.406488	0.507988	-0.800193	0.423599	0.587245
FAM124B	32.0901	-0.310056	0.388557	-0.797969	0.424888	0.587945
HLA-F	720.491	0.365451	0.462861	0.789548	0.429792	0.593635
MAP3K8	326.4	-0.264746	0.338032	-0.783198	0.433511	0.597671
HLA-E	6260.82	0.324249	0.418056	0.775613	0.437978	0.602722
IGF2R	661.634	-0.25669	0.336345	-0.763174	0.445359	0.611489
PROM1	29.5427	-0.274597	0.3603	-0.762135	0.445979	0.611489
HLA-DMA	1117.77	0.325828	0.433844	0.751026	0.452637	0.619485
CSF1	203.448	0.299892	0.40192	0.74615	0.455577	0.621241
LOXL2	42.8112	-0.317064	0.424621	-0.746699	0.455245	0.621241
ICOSLG	117.317	-0.282038	0.379458	-0.743266	0.457321	0.622487
SFRP1	197.514	-0.613159	0.827253	-0.741199	0.458573	0.623061
CEP55	178.227	-0.365602	0.498862	-0.732872	0.463636	0.628802
PKM	5828.64	0.351311	0.483631	0.726403	0.467592	0.633021
A2M	5623.64	0.458633	0.633296	0.7242	0.468943	0.633707
MYD88	597.153	0.262119	0.363811	0.720481	0.471229	0.63565
IFITM1	2596.89	0.445193	0.624918	0.712402	0.476216	0.640415
MAGEA3/A6	948.626	-0.987451	1.38688	-0.711994	0.476469	0.640415
LILRA5	64.1124	0.37682	0.530862	0.709826	0.477812	0.641071
LILRA3	32.3035	-0.233631	0.331089	-0.705646	0.480409	0.643404
TNFRSF10C	29.3009	0.361382	0.515044	0.701654	0.482895	0.645582
OLR1	85.5351	0.52773	0.756071	0.69799	0.485183	0.64614
P2RY13	115.297	0.268044	0.38602	0.694379	0.487445	0.64614
PGPEP1	118.666	-0.298326	0.427646	-0.697601	0.485427	0.64614
PRKACB	410.864	-0.258637	0.372622	-0.694099	0.48762	0.64614
RORC	78.6725	0.732589	1.05179	0.696517	0.486105	0.64614
ITGB3	944.96	-1.07362	1.56532	-0.685879	0.492789	0.650757
TAPBP	2087.76	0.25578	0.372966	0.685799	0.49284	0.650757
TNFRSF10B	317.499	0.286754	0.420904	0.68128	0.495694	0.653376
CCND2	384.155	0.299331	0.440792	0.679075	0.497091	0.654067
GOT2	439.705	-0.241736	0.356887	-0.677346	0.498187	0.654361
SLC7A5	2078.57	-0.635463	0.945033	-0.672424	0.501314	0.656679
STAT3	1387.3	-0.148931	0.221686	-0.671813	0.501703	0.656679
AQP9	75.6927	-0.441044	0.659049	-0.669213	0.50336	0.6577
BMP2	64.1218	0.398735	0.60485	0.65923	0.509748	0.659157
IL10	28.6558	0.239639	0.359899	0.665849	0.505508	0.659157
IL12RB2	499.78	-0.427028	0.647036	-0.659975	0.50927	0.659157
MAP3K5	163.669	-0.212476	0.321745	-0.660388	0.509005	0.659157
TGFBR1	1703.86	-0.341349	0.515708	-0.661904	0.508033	0.659157
TLR4	420.531	0.33307	0.503694	0.661254	0.508449	0.659157
NFKBIA	2533.74	-0.213096	0.325518	-0.654636	0.512702	0.661836
CXCL16	176.91	0.237619	0.364097	0.652625	0.513998	0.662368
FAP	302.808	0.413864	0.652034	0.634728	0.525606	0.67563
MAML2	189.367	0.242845	0.383045	0.633986	0.52609	0.67563
CCND3	323.952	0.178482	0.2862	0.623626	0.532873	0.683171
NFAM1	56.4936	0.317235	0.509896	0.622155	0.53384	0.683242
RRM2	583.201	-0.361026	0.585365	-0.616753	0.537397	0.686624
CSF2RB	125.681	0.339438	0.553019	0.61379	0.539354	0.687151
SERPINB5	281.936	-0.886748	1.44574	-0.613353	0.539643	0.687151
CCL20	32.8437	-0.314813	0.514715	-0.611625	0.540786	0.68744
LAMB3	118.276	-0.32942	0.544606	-0.604878	0.54526	0.691955
DEFB134	13.8129	0.224555	0.37447	0.59966	0.548733	0.694013
IL6R	373.175	-0.262774	0.437455	-0.600688	0.548048	0.694013
TNFRSF4	19.0012	-0.260768	0.437922	-0.595465	0.551533	0.694043
TWIST1	79.0616	-0.347771	0.583902	-0.595599	0.551443	0.694043
VCAN	1180.33	0.34466	0.578643	0.595634	0.55142	0.694043
PTPN11	1272.97	-0.172683	0.293596	-0.588165	0.556422	0.699022
CD68	825.999	0.246267	0.421367	0.584447	0.558919	0.70027
ROBO4	51.5773	-0.209586	0.358937	-0.583908	0.559282	0.70027
CXCL1	140.455	-0.388315	0.680398	-0.570717	0.568191	0.709057
IFNGR2	1562.5	-0.254377	0.445314	-0.571231	0.567843	0.709057
GLUL	3935.65	-0.300142	0.527698	-0.568776	0.569508	0.70952
IKBKG	209.795	-0.131763	0.233437	-0.564448	0.572449	0.711516
TNFAIP6	75.3708	0.35402	0.628109	0.563628	0.573008	0.711516
NBN	879.574	-0.158123	0.284329	-0.556127	0.578124	0.716682
IL7R	351.435	0.369646	0.672817	0.549401	0.58273	0.71832
NOTCH1	282.121	-0.152972	0.277324	-0.551601	0.581222	0.71832
OLFML2B	183.759	0.210936	0.385601	0.54703	0.584358	0.71832
RIPK3	67.3112	-0.145834	0.266052	-0.548141	0.583595	0.71832
TLR3	121.551	-0.245136	0.448587	-0.546462	0.584749	0.71832
TNFRSF10D	44.7633	-0.207468	0.380106	-0.545817	0.585192	0.71832
RBL2	1015.09	-0.187126	0.347883	-0.537898	0.590648	0.723833
CDH11	725.697	0.289773	0.545747	0.530966	0.595443	0.728519
TREM1	55.9799	0.362737	0.685494	0.52916	0.596694	0.728861
BCL2L1	716.182	-0.228109	0.437681	-0.521176	0.602244	0.734444
HDAC11	169.5	-0.261608	0.504704	-0.518339	0.604222	0.734467
RELB	303.757	-0.123355	0.237845	-0.518636	0.604015	0.734467
NGFR	141.755	0.220366	0.426803	0.516318	0.605632	0.734991
CASP1	508.573	0.296086	0.581087	0.509539	0.610375	0.739549
TREM2	203.972	-0.36983	0.729266	-0.507126	0.612066	0.740403
KIR3DL2	4.98948	-0.237615	0.471158	-0.504321	0.614036	0.741589
TNFRSF11A	59.1681	0.186494	0.372525	0.500622	0.616637	0.743534
SHC2	123.475	0.433198	0.869148	0.498417	0.61819	0.74421
SREBF1	1351.99	-0.299176	0.607151	-0.492753	0.622187	0.747821
CD40LG	58.1711	-0.265892	0.556933	-0.477422	0.633062	0.759674
TFRC	877.105	-0.208041	0.443322	-0.469276	0.638872	0.765422
THBS1	1751.01	0.270002	0.587306	0.459729	0.645711	0.772381
EPM2AIP1	624.735	-0.154576	0.34058	-0.453861	0.649929	0.776189
ICAM2	127.286	0.124325	0.276023	0.450416	0.65241	0.777914
GPR160	78.6613	-0.19141	0.426503	-0.448789	0.653584	0.778076
ITGAX	604.931	0.171171	0.386248	0.443163	0.657648	0.780469
TNFRSF18	37.0115	-0.166286	0.375258	-0.443125	0.657675	0.780469
MGMT	179.624	-0.219484	0.500957	-0.438129	0.661293	0.783522
GPC4	72.0348	-0.280034	0.642065	-0.436146	0.662731	0.783988
BLM	107.348	-0.209892	0.484228	-0.433458	0.664682	0.785058
COL6A3	2229.36	0.218544	0.511396	0.427348	0.669126	0.789064
H2AFX	131.617	0.18458	0.437733	0.421673	0.673264	0.791454
PDGFB	84.6845	-0.128766	0.304673	-0.422638	0.67256	0.791454
CCL19	533.684	0.32317	0.785849	0.411236	0.680899	0.795994
CTSS	2708.74	0.237494	0.576673	0.411835	0.680461	0.795994
NID2	226.476	-0.177846	0.433144	-0.410593	0.681371	0.795994
WNT5B	29.065	-0.133611	0.324897	-0.411242	0.680895	0.795994
CCR4	126.148	0.26109	0.652296	0.400264	0.688962	0.799833
CD69	124.489	0.179273	0.44335	0.40436	0.685948	0.799833
FBP1	289.038	0.197417	0.494942	0.398869	0.68999	0.799833
IL6	55.6042	0.156157	0.390483	0.399908	0.689224	0.799833
TAF3	43.2109	-0.123854	0.309415	-0.400285	0.688947	0.799833
CDH2	308.576	-0.305721	0.778938	-0.392485	0.6947	0.801397
CX3CR1	68.2955	0.171737	0.436297	0.393624	0.693859	0.801397
DUSP5	1059.91	0.314854	0.807198	0.390059	0.696493	0.801397
MKI67	382.869	-0.192354	0.493471	-0.389797	0.696686	0.801397
PRKX	14.2309	-0.134841	0.347207	-0.38836	0.69775	0.801397
SPRY4	1378.05	0.343686	0.873388	0.393509	0.693944	0.801397
ATM	967.958	-0.153846	0.401833	-0.38286	0.701824	0.80431
CXCL2	139.61	-0.190713	0.499196	-0.382041	0.702431	0.80431
CDH1	1466.84	0.350617	0.954874	0.367186	0.71348	0.815716
VSIR	175.666	0.136225	0.376483	0.361835	0.717475	0.819036
KLRB1	95.1161	0.178549	0.50247	0.355343	0.722333	0.823328
HIF1A	1502.73	-0.0937193	0.266363	-0.351848	0.724953	0.82381
VEGFC	83.7735	-0.107346	0.30394	-0.353182	0.723952	0.82381
UBB	10185.7	0.241911	0.692744	0.349207	0.726934	0.824811
ANGPT1	160.143	0.172028	0.497903	0.345505	0.729715	0.826716
DPP4	82.0857	-0.171387	0.507082	-0.337986	0.735374	0.829219
HLA-DOB	68.7055	0.113001	0.33591	0.336403	0.736567	0.829219
MAGEC2	335.656	-0.563793	1.66395	-0.338827	0.73474	0.829219
ROR2	96.7677	-0.172934	0.515867	-0.335229	0.737452	0.829219
TNFSF8	52.3564	-0.130396	0.384269	-0.339334	0.734358	0.829219
PLA1A	758.994	-0.294801	0.894327	-0.329634	0.741677	0.832721
TNFRSF11B	50.1435	0.0997515	0.307677	0.324208	0.74578	0.836077
MS4A4A	507.526	0.138005	0.429081	0.321629	0.747734	0.837016
RIPK2	278.737	-0.0950645	0.298833	-0.318119	0.750395	0.837879
TBXAS1	193.035	-0.132734	0.417843	-0.317665	0.750739	0.837879
IFI16	2822.95	0.0927319	0.295175	0.314159	0.7534	0.839599
STAT2	2676.85	-0.176053	0.566059	-0.311016	0.755788	0.841011
MICB	127.957	-0.164905	0.537291	-0.306919	0.758905	0.843228
NOD2	100.153	0.142141	0.468414	0.303453	0.761545	0.844909
JAK2	667.454	0.109544	0.364858	0.300237	0.763996	0.846377
CCL13	120.668	-0.21821	0.76584	-0.284929	0.775698	0.858074
ADGRE1	15.1544	-0.117278	0.419528	-0.279549	0.779824	0.861366
ADAM12	441.365	-0.164087	0.602767	-0.272222	0.785451	0.866306
SELP	68.2413	-0.14606	0.560599	-0.260542	0.794445	0.873657
TNFSF4	77.4297	0.141894	0.542691	0.261464	0.793735	0.873657
SFRP4	200.492	0.238105	0.929242	0.256235	0.797769	0.876028
TMEM140	334.675	0.134783	0.535016	0.251924	0.8011	0.878399
TLR9	34.2282	0.0919587	0.369071	0.249163	0.803235	0.879454
SLAMF7	189.234	0.151719	0.634282	0.239198	0.810952	0.88661
CD79A	97.9141	-0.148559	0.632992	-0.234693	0.814447	0.888554
MMP9	226.091	-0.084331	0.360618	-0.233851	0.8151	0.888554
CXCL8	255.612	-0.22023	0.956868	-0.230157	0.81797	0.890388
ADM	175.409	-0.161635	0.754192	-0.214315	0.830301	0.898594
AXL	224.942	0.0800688	0.366818	0.218279	0.827212	0.898594
CLEC5A	53.4076	0.10182	0.474707	0.21449	0.830165	0.898594
FGFR1	296.401	-0.0879165	0.409956	-0.214454	0.830193	0.898594
BCAT1	72.1237	-0.0738912	0.34816	-0.212233	0.831925	0.898724
PVRIG	116.583	-0.0546116	0.260609	-0.209554	0.834016	0.898724
TGFB1	1186.08	-0.0918528	0.437439	-0.209979	0.833684	0.898724
HLA-DRB1	2883.37	0.101454	0.499321	0.203183	0.838992	0.902789
BAD	186.327	-0.073835	0.368197	-0.200531	0.841065	0.903723
CXCL14	4959.47	-0.206635	1.04667	-0.197421	0.843498	0.903748
MARCO	79.4623	0.0792552	0.398542	0.198863	0.84237	0.903748
CCNO	45.856	-0.122879	0.643591	-0.190927	0.848582	0.904607
DLL4	35.5916	-0.102013	0.536244	-0.190236	0.849124	0.904607
IL18R1	51.6478	-0.100852	0.529277	-0.190548	0.84888	0.904607
MAGEA12	179.177	-0.201582	1.04756	-0.19243	0.847405	0.904607
CD1C	156.327	-0.151705	0.832434	-0.182242	0.855392	0.909992
FZD9	71.8564	-0.109755	0.626194	-0.175274	0.860865	0.914516
PLOD2	223.909	0.0788649	0.48332	0.163173	0.870382	0.923319
CCNA1	20.9673	0.0691095	0.464292	0.148849	0.881673	0.933975
MRC1	342.618	0.0678124	0.463544	0.146291	0.883691	0.934794
IFITM2	1142.14	-0.0549439	0.384121	-0.143038	0.88626	0.935919
MFGE8	7132.51	-0.13428	0.947079	-0.141783	0.887251	0.935919
CASP8	203.337	-0.0419721	0.300862	-0.139506	0.88905	0.9365
NFKBIE	276.594	0.0552706	0.408118	0.135428	0.892273	0.938577
CD244	54.7942	-0.0643228	0.487073	-0.13206	0.894937	0.94006
LY9	81.5579	0.0754542	0.583342	0.129348	0.897082	0.940995
GMIP	55.0451	0.0431856	0.348127	0.124051	0.901275	0.944073
CXCR4	783.219	-0.0471564	0.401421	-0.117474	0.906485	0.947409
ICAM1	1194.19	-0.0507242	0.434133	-0.11684	0.906987	0.947409
C2	184.969	0.0564893	0.515497	0.109582	0.912741	0.950345
CD47	1629.01	0.0429749	0.420431	0.102216	0.918585	0.950345
CEBPB	1054.73	-0.0377979	0.363179	-0.104075	0.91711	0.950345
DUSP2	66.5953	0.0417202	0.415058	0.100517	0.919934	0.950345
FCGR2A	411.041	-0.041305	0.394425	-0.104722	0.916596	0.950345
GLS	365.161	0.0344456	0.323121	0.106603	0.915104	0.950345
SNAI1	70.4788	0.0338275	0.305106	0.110872	0.911718	0.950345
WNT2	40.6666	-0.0647489	0.639088	-0.101314	0.919301	0.950345
P4HA2	275.932	-0.0508007	0.543756	-0.0934255	0.925565	0.954847
IL1B	30.0489	0.0428305	0.472921	0.0905659	0.927838	0.955877
COL5A1	779.466	0.0504934	0.593109	0.0851333	0.932155	0.959008
PECAM1	866.05	0.0226115	0.285276	0.0792618	0.936824	0.962491
SIRPA	1103.55	0.0447333	0.596587	0.0749821	0.940229	0.964667
WNT3A	13.1245	-0.0260392	0.362524	-0.0718275	0.942739	0.965921
HLA-A	9122.17	0.0408332	0.60715	0.0672539	0.94638	0.966163
HLA-C	5433.04	-0.0249725	0.374535	-0.066676	0.94684	0.966163
NLRP3	21.1897	-0.0214863	0.315562	-0.0680891	0.945715	0.966163
SFXN1	420.189	0.0331033	0.515524	0.064213	0.948801	0.966848
TLR1	144.278	-0.0240097	0.43137	-0.0556593	0.955613	0.972272
TNFRSF25	141.046	-0.0263353	0.485217	-0.0542753	0.956716	0.972272
MAP3K7	1018.07	-0.0133495	0.275322	-0.0484871	0.961328	0.973403
TDO2	62.4345	0.0276884	0.576925	0.047993	0.961722	0.973403
XCL1/2	45.4166	-0.0158283	0.321824	-0.0491831	0.960773	0.973403
NFKB2	520.014	-0.0153297	0.333305	-0.0459929	0.963316	0.973702
FUT4	97.052	0.0132218	0.324024	0.040805	0.967451	0.976566
THY1	667.424	-0.0139541	0.372437	-0.037467	0.970113	0.977936
CCL3/L1	358.366	-0.0207813	0.722186	-0.0287755	0.977044	0.983601
APLNR	69.9051	0.0101207	0.455684	0.02221	0.98228	0.987547
APH1B	156.14	-0.00737251	0.596578	-0.012358	0.99014	0.992787
VTCN1	40.5942	0.00458336	0.348477	0.0131526	0.989506	0.992787
FCAR	10.3118	-0.00150677	0.379797	-0.0039673	0.996835	0.996835
INHBA	94.3244	0.00350227	0.66198	0.0052906	0.995779	0.996835
CDKN2B	269.704	-1.41965	0.823287	-1.72437	NA	NA
COL11A2	991.66	-1.26978	1.80165	-0.704791	NA	NA
EGF	96.164	-0.587245	0.851146	-0.689946	NA	NA
HEY1	440.803	-1.59191	0.741798	-2.14602	NA	NA
HLA-DRB5	276.799	-5.78754	1.63728	-3.53486	NA	NA
HSD11B1	94.9079	-0.390131	0.743829	-0.524491	NA	NA
IL11	101.665	-2.97435	1.0745	-2.76812	NA	NA
IL1R2	98.1371	-1.12907	0.688906	-1.63893	NA	NA
MAGEA1	96.0574	-0.488547	0.994768	-0.491117	NA	NA
MAGEB2	209.131	-1.10686	1.40425	-0.788218	NA	NA
MMP1	83.5369	-0.320526	1.00442	-0.319117	NA	NA
PDZK1IP1	76.1861	-2.57758	0.985217	-2.61626	NA	NA
PIK3CD	992.32	-2.34998	0.827108	-2.8412	NA	NA
PRLR	86.8038	-3.2948	0.985033	-3.34486	NA	NA
RASGRF1	179.069	-1.61302	1.05948	-1.52246	NA	NA
S100A8	406.774	-1.72172	0.952539	-1.80751	NA	NA
SLC2A1	201.289	-2.3958	0.75799	-3.16073	NA	NA
STC1	370.767	-4.62119	1.54608	-2.98898	NA	NA
VEGFA	538.081	-2.56798	0.83254	-3.08451	NA	NA
ZC3H12A	71.8121	-0.728829	0.676513	-1.07733	NA	NA

## Sheet: pathways
interferon_gamma	interferon_alpha	antigen_presentation	il2_repsonse	tertiary_lymphoid_structure	dysfunction
ADAR	ADAR	ARG2	ABCB1	CCL2	LAG3
APOL6	B2M	ATF3	ADAM19	CCL4	PDCD1
ARID5B	BATF2	B2M	AGER	CCL5	HAVCR2
ARL4A	BST2	BATF3	AHCY	CCL8	CTLA4
AUTS2	C1S	BLK	AHNAK	CCL18	CXCL13
B2M	CASP1	CCL22	AHR	CCL19
BANK1	CASP8	CCL3/L1	ALCAM	CCL21
BATF2	CCRL2	CCL4	AMACR	CXCL9
BPGM	CD47	CCL5	ANXA4	CXCL10
BST2	CD74	CCR5	APLP1	CXCL11
BTG1	CMPK2	CD14	ARL4A	CXCL13
C1R	CMTR1	CD19	BATF
C1S	CNP	CD1C	BATF3
CASP1	CSF1	CD27	BCL2
CASP3	CXCL10	CD274	BCL2L1
CASP4	CXCL11	CD276	BHLHE40
CASP7	DDX60	CD38	BMP2
CASP8	DHX58	CD3E	BMPR2
CCL2	EIF2AK2	CD4	CA2
CCL5	ELF1	CD58	CAPG
CCL7	EPSTI1	CD68	CAPN3
CD274	GBP2	CD74	CASP3
CD38	GBP4	CD79B	CCND2
CD40	GMPR	CD80	CCND3
CD69	HELZ2	CD86	CCNE1
CD74	HERC6	CD8A	CCR4
CD86	HLA-C	CMKLR1	CD44
CDKN1A	IFI27	CST2	CD48
CFB	IFI30	CTLA4	CD79B
CFH	IFI35	CTSS	CD81
CIITA	IFI44	CTSW	CD83
CMKLR1	IFI44L	CXCL1	CD86
CMPK2	IFIH1	CXCL10	CDC42SE2
CMTR1	IFIT2	CXCL11	CDC6
CSF2RB	IFIT3	CXCL12	CDCP1
CXCL10	IFITM1	CXCL9	CDKN1C
CXCL11	IFITM2	CXCR6	CISH
CXCL9	IFITM3	ELOB	CKAP4
DDX58	IL15	FOXP3	COCH
DDX60	IL4R	GNLY	COL6A1
DHX58	IL7	GZMA	CSF1
EIF2AK2	IRF1	GZMB	CSF2
EIF4E3	IRF2	HERC6	CST7
EPSTI1	IRF7	HLA-A	CTLA4
FAS	IRF9	HLA-B	CTSZ
FCGR1A	ISG15	HLA-C	CXCL10
FGL2	ISG20	HLA-DMA	CYFIP1
FPR1	LAMP3	HLA-DMB	DCPS
GBP4	LAP3	HLA-DOA	DENND5A
GBP6	LGALS3BP	HLA-DOB	DHRS3
GCH1	LPAR6	HLA-DPA1	DRC1
GPR18	LY6E	HLA-DPB1	ECM1
GZMA	MOV10	HLA-DQA1	EEF1AKMT1
HELZ2	MVB12A	HLA-DQA2	EMP1
HERC6	MX1	HLA-DQB1	ENO3
HIF1A	NCOA7	HLA-DRA	ENPP1
HLA-A	NMI	HLA-DRB1	EOMES
HLA-B	NUB1	HLA-DRB5	ETFBKMT
HLA-DMA	OAS1	HLA-E	ETV4
HLA-DQA1	OASL	HLA-F	F2RL2
HLA-DRB1	OGFR	ICAM1	FAH
HLA-G	PARP12	ICAM2	FAM126B
ICAM1	PARP14	ICAM3	FGL2
IDO1	PARP9	ICOSLG	FLT3LG
IFI27	PLSCR1	IDO1	FURIN
IFI30	PNPT1	IFNG	GABARAPL1
IFI35	PROCR	IFNGR1	GADD45B
IFI44	PSMA3	IFNGR2	GALM
IFI44L	PSMB8	IL11	GATA1
IFIH1	PSMB9	IL2	GBP4
IFIT1	PSME1	IL33	GLIPR2
IFIT2	PSME2	IL4	GPR65
IFIT3	RIPK2	IRF1	GPR83
IFITM2	RNF31	IRF8	GPX4
IFITM3	RSAD2	LAG3	GSTO1
IFNAR2	RTP4	LDHA	GUCY1B1
IL10RA	SAMD9	LDHB	HIPK2
IL15	SAMD9L	LILRA1	HK2
IL15RA	SELL	LILRA3	HOPX
IL18BP	SLC25A28	MICA	HUWE1
IL2RB	SP110	MS4A1	ICOS
IL4R	STAT2	NKG7	IFITM3
IL6	TAP1	PDCD1	IFNGR1
IL7	TDRD7	PDCD1LG2	IGF1R
IRF1	TENT5A	PRF1	IGF2R
IRF2	TMEM140	PSMB10	IKZF2
IRF4	TRAFD1	PSMB5	IKZF4
IRF5	TRIM14	PSMB8	IL10
IRF7	TRIM21	PSMB9	IL10RA
IRF8	TRIM25	SNCA	IL13
IRF9	TRIM26	STAT1	IL18R1
ISG15	TRIM5	TAP1	IL1R2
ISG20	TXNIP	TAP2	IL1RL1
ISOC1	UBA7	TAPBP	IL2RA
ITGB7	UBE2L6	TAPBPL	IL2RB
JAK2	USP18	TGFB2	IL3RA
KLRK1	WARS1	THBD	IL4R
LAP3		THBS1	IRF4
LATS2		TIGIT	IRF6
LCP2		TMEM173	IRF8
LGALS3BP		ULBP2	ITGA6
LY6E			ITGAE
LYSMD2			ITGAV
MARCHF1			ITIH5
METTL7B			KLF6
MT2A			LCLAT1
MTHFD2			LIF
MVP			LRIG1
MX1			LRRC8C
MX2			LTB
MYD88			MAFF
NAMPT			MAP3K8
NCOA3			MAP6
NFKB1			MAPKAPK2
NFKBIA			MUC1
NLRC5			MXD1
NMI			MYC
NOD1			MYO1C
NUP93			MYO1E
OAS2			NCOA3
OAS3			NCS1
OASL			NDRG1
OGFR			NFIL3
P2RY14			NFKBIZ
PARP12			NOP2
PARP14			NRP1
PDE4B			NT5E
PELI1			ODC1
PFKP			P2RX4
PIM1			P4HA1
PLA2G4A			PDCD2L
PLSCR1			PENK
PML			PHLDA1
PNP			PHTF2
PNPT1			PIM1
PSMA2			PLAGL1
PSMA3			PLEC
PSMB10			PLIN2
PSMB2			PLPP1
PSMB8			PLSCR1
PSMB9			PNP
PSME1			POU2F1
PSME2			PRAF2
PTGS2			PRKCH
PTPN1			PRNP
PTPN2			PTCH1
PTPN6			PTGER2
RAPGEF6			PTH1R
RBCK1			PTRH2
RIPK1			PUS1
RIPK2			RABGAP1L
RNF213			RGS16
RNF31			RHOB
RSAD2			RHOH
RTP4			RNH1
SAMD9L			RORA
SAMHD1			RRAGD
SECTM1			S100A1
SELP			SCN9A
SERPING1			SELL
SLAMF7			SELP
SLC25A28			SERPINB6
SOCS1			SERPINC1
SOCS3			SH3BGRL2
SOD2			SHE
SP110			SLC1A5
SPPL2A			SLC29A2
SRI			SLC2A3
SSPN			SLC39A8
ST3GAL5			SMPDL3A
ST8SIA4			SNX14
STAT1			SNX9
STAT2			SOCS1
STAT3			SOCS2
STAT4			SPP1
TAP1			SPRED2
TAPBP			SPRY4
TDRD7			ST3GAL4
TNFAIP2			SWAP70
TNFAIP3			SYNGR2
TNFAIP6			SYT11
TNFSF10			TGM2
TOR1B			TIAM1
TRAFD1			TLR7
TRIM14			TNFRSF18
TRIM21			TNFRSF1B
TRIM25			TNFRSF21
TRIM26			TNFRSF4
TXNIP			TNFRSF8
UBE2L6			TNFRSF9
UPP1			TNFSF10
USP18			TNFSF11
VAMP5			TRAF1
VAMP8			TTC39B
VCAM1			TWSG1
WARS1			UCK2
XAF1			UMPS
XCL1			WLS
ZBP1			XBP1
ZNFX1
