# Supplementary material for: Tumor MHC Class I Expression Associates with Intralesional IL2 Response in Melanoma
Source: Oxford University Press journal article supplement (doi:10.1158/2326-6066.cir-21-1083), 2022-01-10
Supplement: cir-21-1083_supplementary_data_supp17.xlsx [file cir-21-1083_supplementary_data_supp17.xlsx]

## Sheet: Sheet1
Lesion ID	Patient Response	Lesion Response	Mutation Count	Tumor Mutation Burden
4_1	Extreme responder	UT	8	7.07965
4_2	Extreme responder	UT	8	7.07965
0_1	Non-responder	UT	4	3.53982
2_1	Non-responder	UT	5	4.42478
3_1	Non-responder	UT	6	5.30973
5_1	Non-responder	UT	16	14.1593
