# Supplementary material for: Tumor MHC Class I Expression Associates with Intralesional IL2 Response in Melanoma
Source: Oxford University Press journal article supplement (doi:10.1158/2326-6066.cir-21-1083), 2022-01-10
Supplement: cir-21-1083_supplementary_data_supp20.xlsx [file cir-21-1083_supplementary_data_supp20.xlsx]

## Sheet: Sheet 1
ID	Cell State (Numerator)	Population (Denominator)	Combination_status	MedianFraction	LO	LOR
50	T_CD8,KI67	T_CD8	TN	0.0227273	-3.7612	0
50	T_CD8,KI67	T_CD8	SP	0.0714286	-2.56495	1.19625
50	T_CD8,KI67	T_CD8	DP	0.0857771	-2.36632	1.39488
50	T_CD8,KI67	T_CD8	TP	0.183333	-1.49393	2.26728
54	T_CD8,CD27	T_CD8	TN	0.210526	-1.32176	0
54	T_CD8,CD27	T_CD8	SP	0.392857	-0.435318	0.886438
54	T_CD8,CD27	T_CD8	DP	0.459936	-0.160601	1.16116
54	T_CD8,CD27	T_CD8	TP	0.535714	0.143101	1.46486
55	T_CD8,ICOS	T_CD8	TN	0.117647	-2.0149	0
55	T_CD8,ICOS	T_CD8	SP	0.23913	-1.15745	0.85745
55	T_CD8,ICOS	T_CD8	DP	0.310714	-0.796782	1.21812
55	T_CD8,ICOS	T_CD8	TP	0.5	0	2.0149
65	T_CD8	Immune_All	TN	0.140873	-1.80806	0
65	T_CD8	Immune_All	SP	0.163317	-1.63376	0.174303
65	T_CD8	Immune_All	DP	0.184791	-1.48422	0.32384
65	T_CD8	Immune_All	TP	0.3	-0.847298	0.96076
87	T_reg4,CD27	T_reg4	TN	0.666667	0.693147	0
87	T_reg4,CD27	T_reg4	SP	0.724138	0.965081	0.271934
87	T_reg4,CD27	T_reg4	DP	0.8	1.38629	0.693147
87	T_reg4,CD27	T_reg4	TP	1	5.72031	5.02716
88	T_reg4,ICOS	T_reg4	TN	0.607692	0.437622	0
88	T_reg4,ICOS	T_reg4	SP	0.75	1.09861	0.66099
88	T_reg4,ICOS	T_reg4	DP	0.845238	1.69773	1.26011
88	T_reg4,ICOS	T_reg4	TP	1	5.72031	5.28269
90	T_reg4,MHCII	T_reg4	TN	0.2	-1.38629	0
90	T_reg4,MHCII	T_reg4	SP	0.433333	-0.268264	1.11803
90	T_reg4,MHCII	T_reg4	DP	0.471429	-0.11441	1.27188
90	T_reg4,MHCII	T_reg4	TP	0.5	0	1.38629
180	T_All,CD27,KI67	T_All,CD27	TN	0.0703704	-2.58101	0
180	T_All,CD27,KI67	T_All,CD27	SP	0.103093	-2.16332	0.417691
180	T_All,CD27,KI67	T_All,CD27	DP	0.153846	-1.70475	0.876266
180	T_All,CD27,KI67	T_All,CD27	TP	0.2	-1.38629	1.19472
183	T_All,KI67	T_All	TN	0.0526316	-2.89037	0
183	T_All,KI67	T_All	SP	0.0882353	-2.33537	0.554997
183	T_All,KI67	T_All	DP	0.0909091	-2.30259	0.587787
183	T_All,KI67	T_All	TP	0.109127	-2.09969	0.790682
187	T_All,CD27	T_All	TN	0.275862	-0.965081	0
187	T_All,CD27	T_All	SP	0.366917	-0.545465	0.419616
187	T_All,CD27	T_All	DP	0.478873	-0.0845574	0.880524
187	T_All,CD27	T_All	TP	0.560714	0.244061	1.20914
261	NKT_CD4,CD27	NKT_CD4	TN	0	-5.72031	0
261	NKT_CD4,CD27	NKT_CD4	SP	0.160256	-1.65632	4.06399
261	NKT_CD4,CD27	NKT_CD4	DP	0.166667	-1.60944	4.11087
261	NKT_CD4,CD27	NKT_CD4	TP	0.75	1.09861	6.81892
402	Macrophage_Other,PDL1-,B7H3,IDO1-	Macrophage_Other	TN	0.692308	0.81093	0
402	Macrophage_Other,PDL1-,B7H3,IDO1-	Macrophage_Other	SP	0.75	1.09861	0.287682
402	Macrophage_Other,PDL1-,B7H3,IDO1-	Macrophage_Other	DP	0.91875	2.42548	1.61455
402	Macrophage_Other,PDL1-,B7H3,IDO1-	Macrophage_Other	TP	1	5.72031	4.90938
425	Macrophage_All,B7H3	Macrophage_All	TN	0.8	1.38629	0
425	Macrophage_All,B7H3	Macrophage_All	SP	0.823529	1.54045	0.154151
425	Macrophage_All,B7H3	Macrophage_All	DP	0.9375	2.70805	1.32176
425	Macrophage_All,B7H3	Macrophage_All	TP	1	5.72031	4.33402
454	Leukocyte_Other,ICOS	Leukocyte_Other	TN	0.0909091	-2.30259	0
454	Leukocyte_Other,ICOS	Leukocyte_Other	SP	0.102632	-2.16832	0.134264
454	Leukocyte_Other,ICOS	Leukocyte_Other	DP	0.2	-1.38629	0.916291
454	Leukocyte_Other,ICOS	Leukocyte_Other	TP	0.25	-1.09861	1.20397
456	Leukocyte_Other,PDL1	Leukocyte_Other	TN	0.157895	-1.67398	0
456	Leukocyte_Other,PDL1	Leukocyte_Other	SP	0.16129	-1.64866	0.0253178
456	Leukocyte_Other,PDL1	Leukocyte_Other	DP	0.235294	-1.17865	0.495321
456	Leukocyte_Other,PDL1	Leukocyte_Other	TP	0.25	-1.09861	0.575364
486	Tumor_All,B7H3	Tumor_All	TN	0.833333	1.60944	0
486	Tumor_All,B7H3	Tumor_All	SP	0.865385	1.86075	0.251314
486	Tumor_All,B7H3	Tumor_All	DP	0.916933	2.40139	0.791948
486	Tumor_All,B7H3	Tumor_All	TP	0.978261	3.80666	2.19722
489	Tumor_All,MHCI	Tumor_All	TN	0.837074	1.63662	0
489	Tumor_All,MHCI	Tumor_All	SP	0.91198	2.33806	0.701443
489	Tumor_All,MHCI	Tumor_All	DP	0.969697	3.46574	1.82912
489	Tumor_All,MHCI	Tumor_All	TP	1	5.72031	4.0837
496	Tumor_All,PDL1-,B7H3,IDO1-	Tumor_All	TN	0.8	1.38629	0
496	Tumor_All,PDL1-,B7H3,IDO1-	Tumor_All	SP	0.807453	1.43355	0.0472529
496	Tumor_All,PDL1-,B7H3,IDO1-	Tumor_All	DP	0.842105	1.67398	0.287682
496	Tumor_All,PDL1-,B7H3,IDO1-	Tumor_All	TP	0.857143	1.79176	0.405465
500	Tumor_All,B2M,MHCI,MHCII-	Tumor_All	TN	0.548387	0.194156	0
500	Tumor_All,B2M,MHCI,MHCII-	Tumor_All	SP	0.632653	0.543615	0.349459
500	Tumor_All,B2M,MHCI,MHCII-	Tumor_All	DP	0.732558	1.00764	0.813484
500	Tumor_All,B2M,MHCI,MHCII-	Tumor_All	TP	0.785714	1.29928	1.10513
504	Tumor_All,B2M-,MHCI,MHCII-	Tumor_All	TN	0.0769231	-2.48491	0
504	Tumor_All,B2M-,MHCI,MHCII-	Tumor_All	SP	0.0802139	-2.43944	0.0454624
504	Tumor_All,B2M-,MHCI,MHCII-	Tumor_All	DP	0.0960591	-2.2418	0.243106
504	Tumor_All,B2M-,MHCI,MHCII-	Tumor_All	TP	0.121951	-1.97408	0.510826
507	Tumor_All	DAPI	TN	0.211982	-1.31302	0
507	Tumor_All	DAPI	SP	0.21308	-1.30646	0.00656585
507	Tumor_All	DAPI	DP	0.407377	-0.374819	0.938203
507	Tumor_All	DAPI	TP	0.591974	0.372132	1.68515
32	T_CD4	Immune_All	TN	0.232406	-1.19478	0
32	T_CD4	Immune_All	SP	0.221739	-1.25556	-0.0607845
32	T_CD4	Immune_All	DP	0.141741	-1.8009	-0.606128
32	T_CD4	Immune_All	TP	0.111111	-2.07944	-0.884666
373	Macrophage_MHCII-	Immune_All	TN	0.0508511	-2.92666	0
373	Macrophage_MHCII-	Immune_All	SP	0.0445545	-3.06547	-0.138802
373	Macrophage_MHCII-	Immune_All	DP	0.0216533	-3.81071	-0.884043
373	Macrophage_MHCII-	Immune_All	TP	0	-5.72031	-2.79365
374	Macrophage_MHCII-	Macrophage_All	TN	0.2	-1.38629	0
374	Macrophage_MHCII-	Macrophage_All	SP	0.16129	-1.64866	-0.262364
374	Macrophage_MHCII-	Macrophage_All	DP	0.125	-1.94591	-0.559616
374	Macrophage_MHCII-	Macrophage_All	TP	0	-5.72031	-4.33402
375	Macrophage_MHCII-	T_All	TN	0.0927835	-2.28011	0
375	Macrophage_MHCII-	T_All	SP	0.0882353	-2.33537	-0.0552627
375	Macrophage_MHCII-	T_All	DP	0.0478118	-2.99149	-0.711378
375	Macrophage_MHCII-	T_All	TP	0	-5.72031	-3.4402
428	Macrophage_All,MRC1	Macrophage_All	TN	0.3	-0.847298	0
428	Macrophage_All,MRC1	Macrophage_All	SP	0.271429	-0.987387	-0.140089
428	Macrophage_All,MRC1	Macrophage_All	DP	0.217391	-1.28093	-0.433636
428	Macrophage_All,MRC1	Macrophage_All	TP	0.154762	-1.69773	-0.850433
437	Macrophage_All,PDL1-,B7H3-,IDO1-	Macrophage_All	TN	0.2	-1.38629	0
437	Macrophage_All,PDL1-,B7H3-,IDO1-	Macrophage_All	SP	0.175439	-1.54756	-0.161268
437	Macrophage_All,PDL1-,B7H3-,IDO1-	Macrophage_All	DP	0.0625	-2.70805	-1.32176
437	Macrophage_All,PDL1-,B7H3-,IDO1-	Macrophage_All	TP	0	-5.72031	-4.33402
498	Tumor_All,PDL1-,B7H3-,IDO1-	Tumor_All	TN	0.166667	-1.60944	0
498	Tumor_All,PDL1-,B7H3-,IDO1-	Tumor_All	SP	0.121849	-1.97504	-0.365601
498	Tumor_All,PDL1-,B7H3-,IDO1-	Tumor_All	DP	0.0830671	-2.40139	-0.791948
498	Tumor_All,PDL1-,B7H3-,IDO1-	Tumor_All	TP	0.0217391	-3.80666	-2.19722
