# Supplementary material for: Tumor MHC Class I Expression Associates with Intralesional IL2 Response in Melanoma
Source: PubMed Central journal article supplement — Cancer Immunol Res. 2022 Mar 3;10(3):303–13. doi: 10.1158/2326-6066.CIR-21-1083 (PMC8898286; doi:10.1158/2326-6066.cir-21-1083), 2022-03-03
Supplement: NIHMS1772365-supplement-1.pdf [file NIHMS1772365-supplement-1.pdf]

# Supplementary Materials for

## **Tumor MHC Class I Expression Associates with Interleukin-2 Response in Melanoma**

Maryam Pourmaleki<sup>1,2</sup>, Caitlin J. Jones<sup>3</sup>, Charlotte E. Ariyan<sup>4</sup>, Zheng Zeng<sup>3</sup>, Mono Pirun<sup>3</sup>, Daniel A. Navarrete<sup>1</sup>, Yanyun Li<sup>5</sup>, Mianlei Zhang<sup>5</sup>, Subhiksha Nandakumar<sup>6</sup>, Carl Campos<sup>1</sup>, Saad Nadeem<sup>7</sup>, David S. Klimstra<sup>5</sup>, Claire F. Temple-Oberle<sup>8,9</sup>, Thomas Brenn<sup>10</sup>, Evan J. Lipson<sup>11</sup>, Kara M. Schenk<sup>11</sup>, Julie E. Stein<sup>12</sup>, Janis M. Taube<sup>11-13</sup>, Michael G. White<sup>14</sup>, Raymond Traweek<sup>14</sup>, Jennifer A. Wargo<sup>14,15</sup>, John M. Kirkwood<sup>16</sup>, Billel Gasmi<sup>17,18</sup>, Stephanie L. Goff<sup>17</sup>, Alex Corwin<sup>19</sup>, Elizabeth McDonough<sup>19</sup>, Fiona Ginty<sup>19</sup>, Margaret K. Callahan<sup>20-22</sup>, Andrea Schietinger<sup>23,24</sup>, Nicholas D. Socci<sup>3,6</sup>, Ingo K. Mellinghoff<sup>1,25,26,\*</sup>, Travis J. Hollmann<sup>5,22\*</sup>

Correspondence to: [hollmant@mskcc.org](mailto:hollmant@mskcc.org) and [mellingi@mskcc.org](mailto:mellingi@mskcc.org)

### **This PDF file includes:**

Supplementary Figures and Legends: S1 to S15  
Supplementary Tables and Legends: S1-S3, S5, S12, S16  
Legends for Supplementary Tables: S4, S6-S11, S13-S15, S17-S19

### **Other Supplementary Materials for this manuscript include the following:**

Supplementary Tables: S4, S6-S11, S13-S15, S17-S19 (.xlsx)

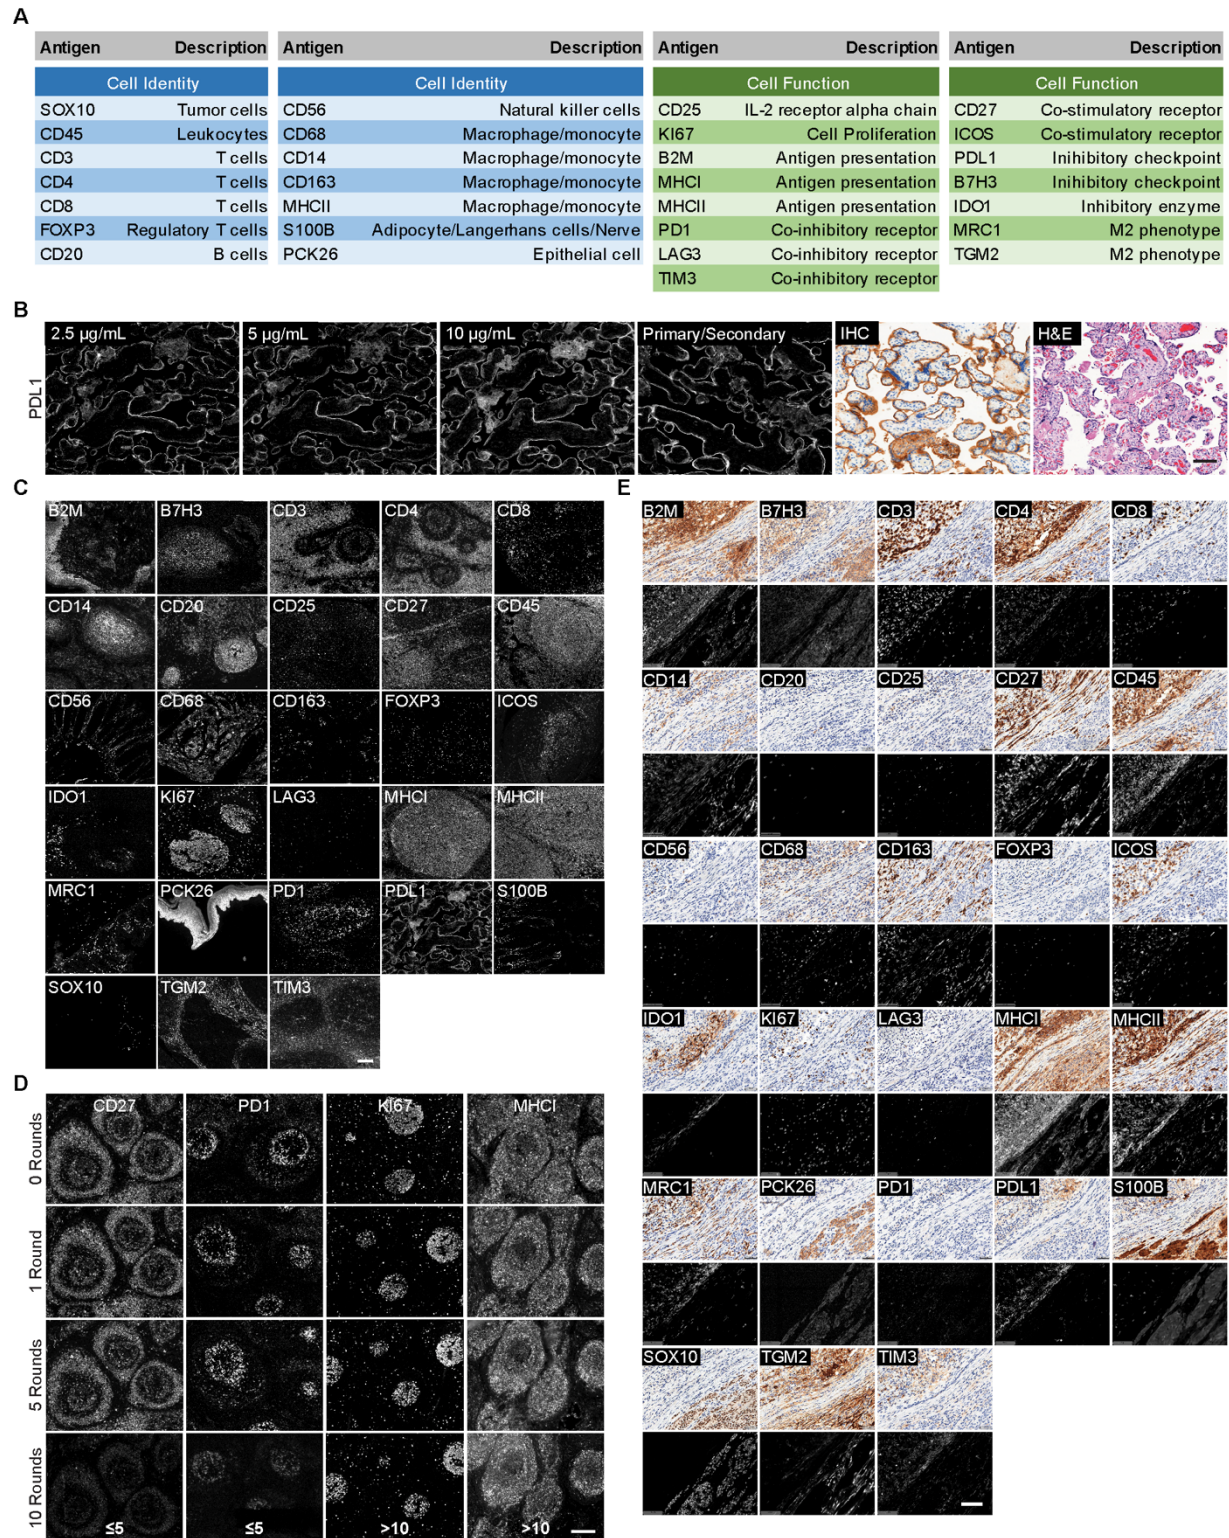

**Supplementary Fig. S1. Selection of antibody panel and validation of multiplexed immunofluorescence staining. (A) Antibody panel. MHC-II was used as both a cell identity and cell function marker. See also Supplementary Table S2. (B) Example of validation process**

shown for PD-L1 on normal human placenta. Representative images showing 3 dilutions of PD-L1 Cy5 direct conjugate, PD-L1 primary with an anti-rabbit IgG Alexa Fluor 647 secondary, PD-L1 immunohistochemistry (IHC), and hematoxylin and eosin (H&E) stained on adjacent tissue sections. **(C)** Representative images showing the optimal staining concentration for each direct conjugate on appropriate normal human controls. Skin: B2M, CD68, CD163, MRC1, PCK26 (panCK), SOX-10. Lymph node: CD3, CD4, CD8, CD20, CD27, CD45, KI-67. Tonsil: B7-H3, CD14, CD25, FOXP3, ICOS, IDO-1 LAG-3, MHC-I, MHC-II, PD-1, TGM2, TIM-3. Colon: CD56, S100B. Placenta: PD-L1. **(D)** Representative images showing the validation process for epitope stability to dye inactivation for CD27, PD-1, KI-67, and MHC-I on normal human lymph node. **(E)** Representative images showing images acquired using multiplexed immunofluorescence (Cell Dive) and IHC for lesion 3\_2. All scale bars are 100-microns.

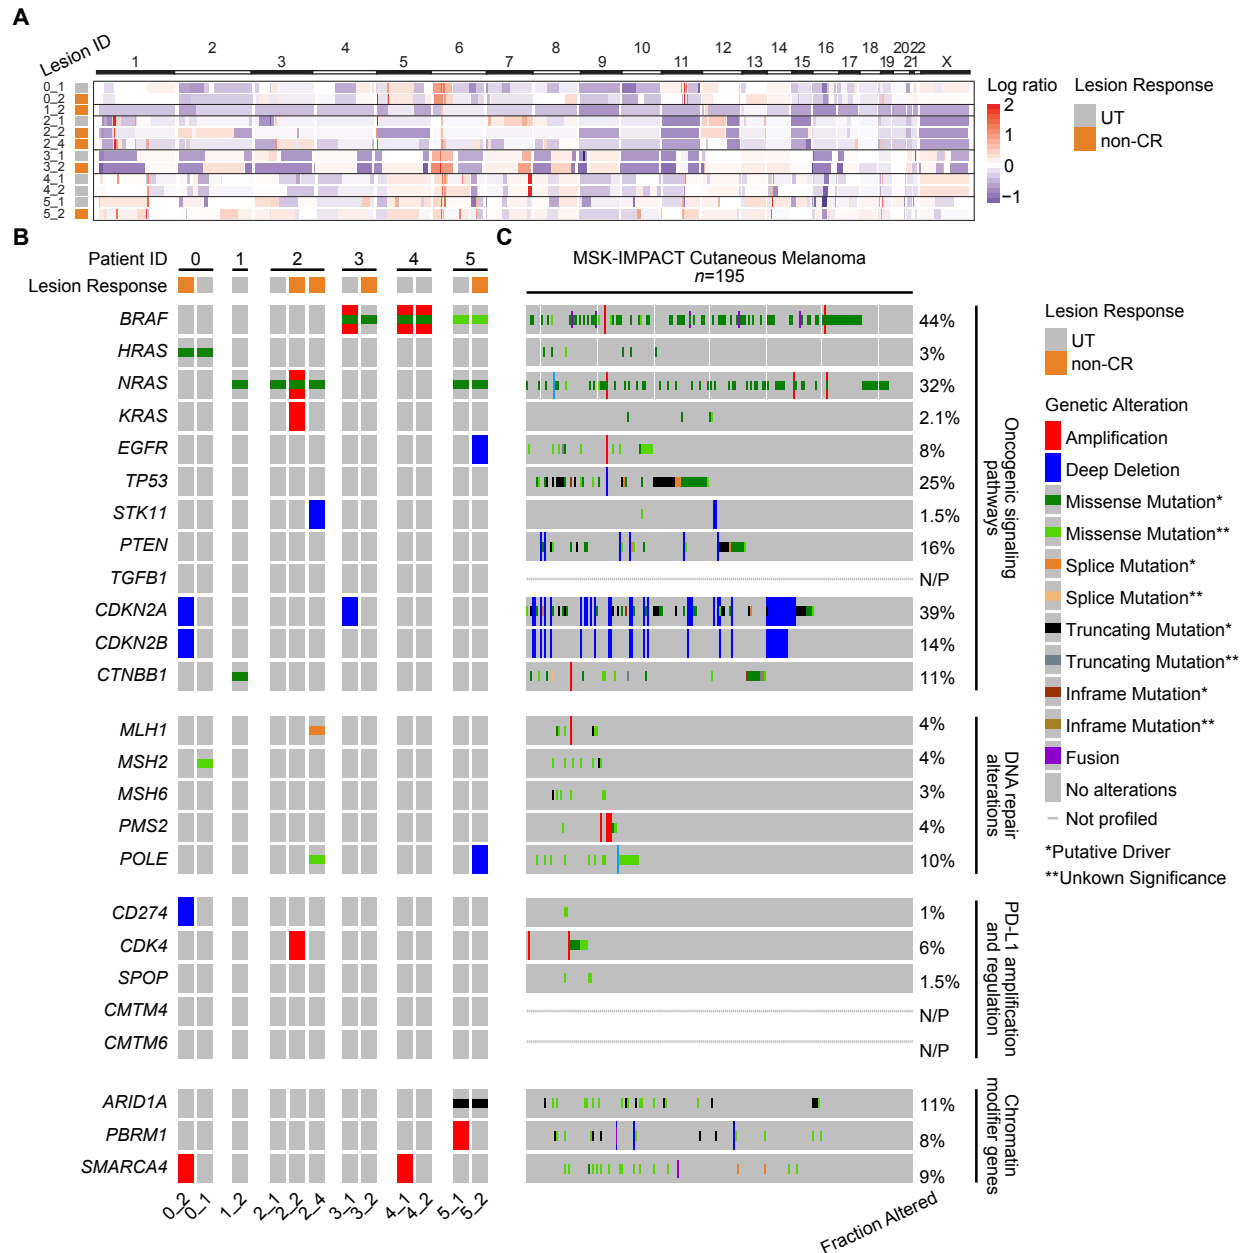

**Supplementary Fig. S2. Genomic profile of in-transit melanoma metastases.** (A) Genome-wide view of gene copy number alterations for the indicated untreated (UT) and non-complete response (non-CR) lesions ordered by lesion ID. Regions of copy gains and loss are indicated in red and blue, respectively. Numbers refer to chromosomal location. (B) Genetic alterations in the untreated and non-CR lesions in the cohort ordered by temporality and (C) in the MSK-IMPACT cutaneous melanoma cohort. Fraction of lesions altered for each gene in the MSK-IMPACT cohort is noted. N/P, not profiled.

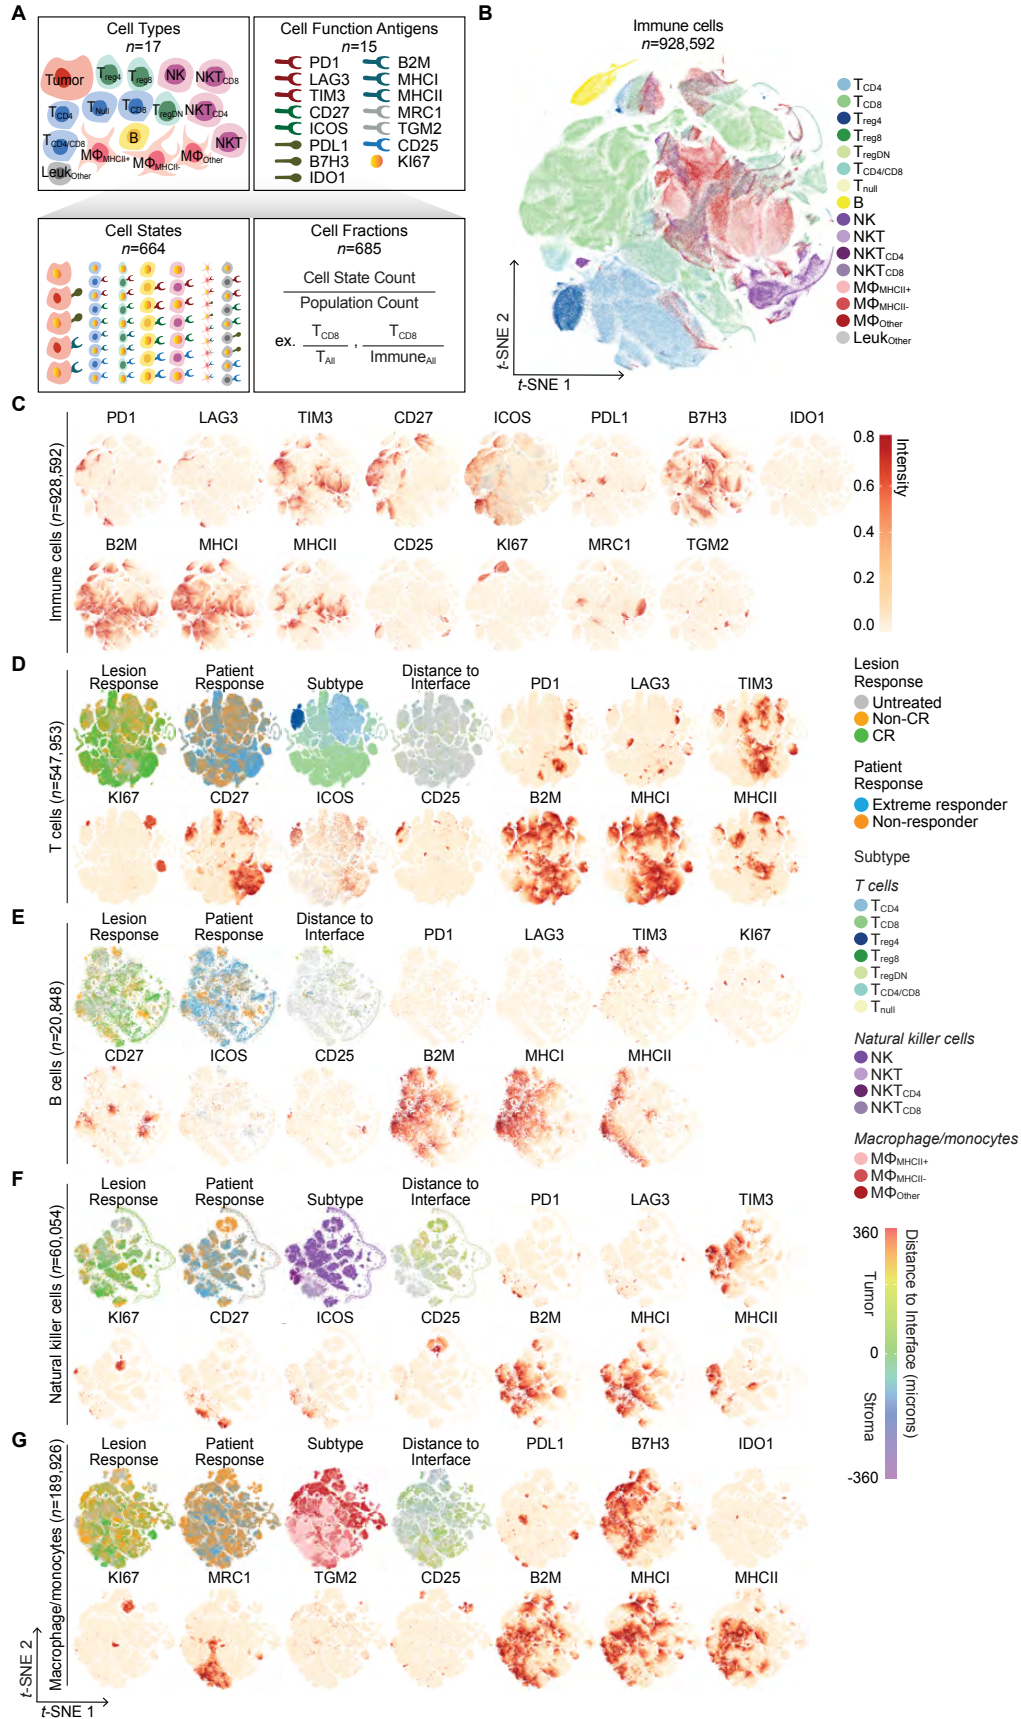

**Supplementary Fig. S3. Phenotypic data for T cells, B cells, NK cells, and myeloid cells.** (A) Single-cell proteomic analysis approach. Derivation of 664 distinct cell states quantified as 685 distinct cell fractions using combinations of cell types and cell function markers. See Supplementary Table S3 for full cell type names. (B) Identification of 16 different immune cell types using single-cell proteomics. *t*-distributed stochastic neighbor embedding (*t*-SNE) of all immune cells from 22 lesions colored by cell type. (C) *t*-SNE of immune cells colored by normalized intensity of each cell function marker. (D) *t*-SNE of all T cells, (E) B cells, (F) natural killer cells, and (G) macrophage/monocytes from 22 lesions colored by the normalized intensity of each cell function marker, lesion response (non-complete response, non-CR; complete response, CR), patient response, subtype, and distance from the interface. Grey cells indicate cells with missing information (ICOS) and cells that are not within 360-microns of the tumor interface (distance to interface).

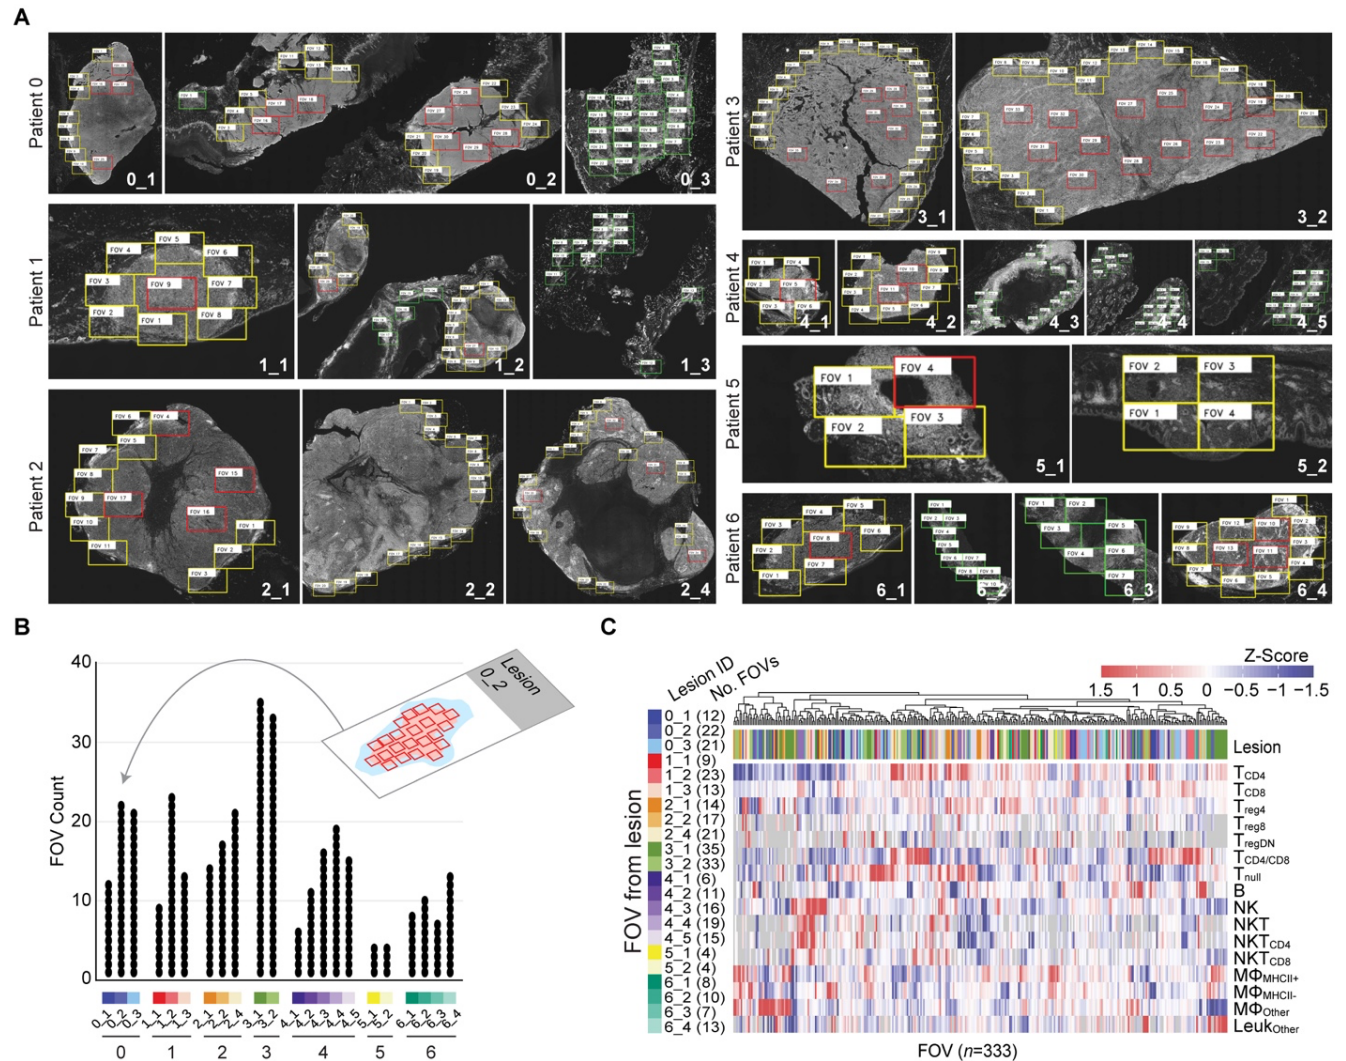

**Supplementary Fig. S4. Intra-tumoral heterogeneity in immune cell composition. (A)** Location of all fields of view (FOVs) in all lesions ( $n=22$ ). Interface FOVs (yellow) cover approximately 50% tumor and 50% stroma, center FOVs (red) cover 100% tumor, and regressed FOVs (green) cover regions of regressed tumor. See also Supplementary Table S5. **(B)** Number of FOVs examined per lesion. **(C)** Intratumoral heterogeneity in immune cell infiltrates. Shown is hierarchical clustering of immune cell fractions over total immune cells in each FOV ( $n=333$ ). FOVs belonging to the same lesion are indicated in the same color (column annotations). For cell type abbreviations, see Supplementary Table S3.

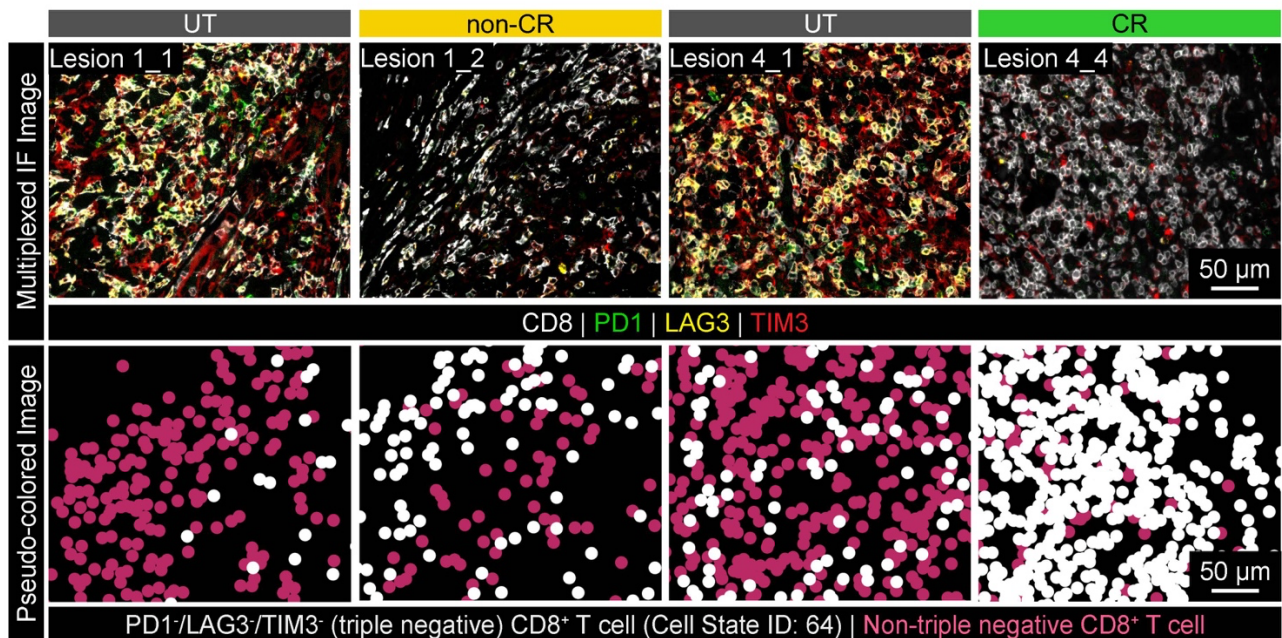

**Supplementary Fig. S5. Increase in triple negative PD-1/LAG-3/TIM-3 CD8<sup>+</sup> T cells in lesions that completely regress following intralesional interleukin-2 injection.** Representative multiplexed immunofluorescence (IF) and pseudo-colored images for untreated (UT) lesion 1\_1 field of view (FOV) 7, non-complete response (non-CR) lesion 1\_2 FOV 25, UT lesion 4\_1 FOV 4, and CR lesion 4\_4 FOV 3. The fraction of triple negative PD-1/LAG-3/TIM-3 CD8<sup>+</sup> T cells over total CD8<sup>+</sup> T cells in each FOV are 0.110, 0.636, 0.249, and 0.777, respectively.



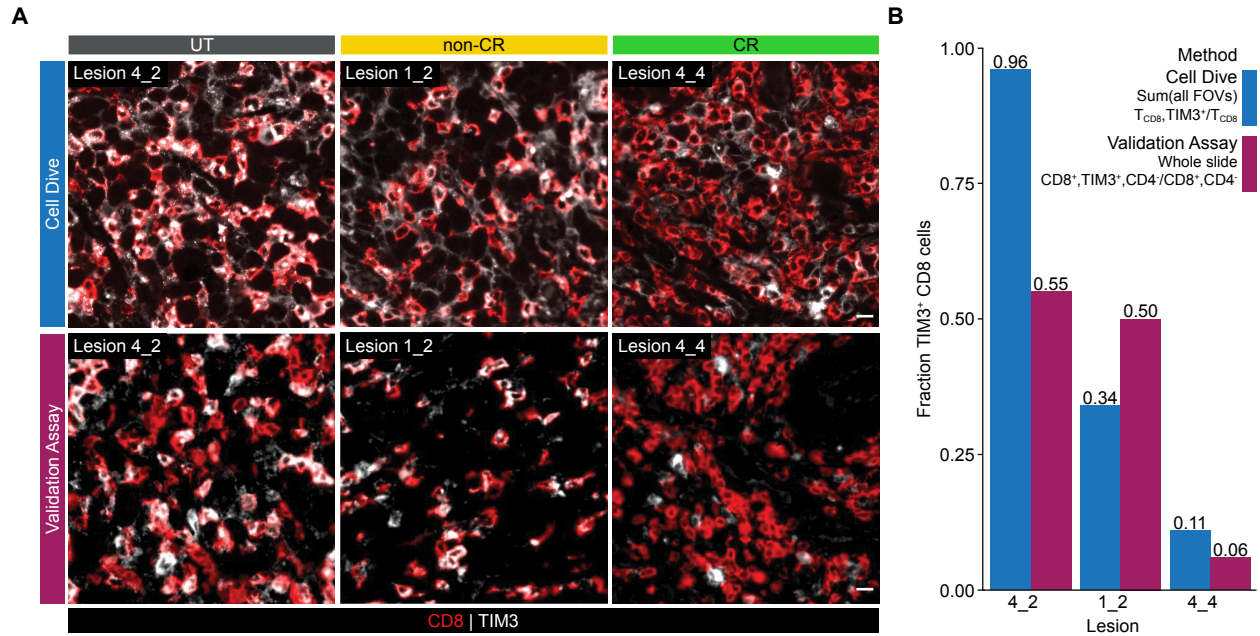

**Supplementary Fig. S6. Decrease in TIM-3 positive CD8<sup>+</sup> T cells in lesions that completely regress following intralesional interleukin-2 injection.** (A) Representative images showing CD8 (red) and TIM-3 (white) in untreated (UT) lesion 4\_2, non-complete response (non-CR) lesion 1\_2, and complete response (CR) lesion 4\_4 acquired using Cell Dive and a different multiplexed immunofluorescence method (validation assay – see methods). Scale bar is 10-microns. (B) Summary of quantified fractions of TIM-3 positive CD8<sup>+</sup> T cells (Cell Dive) and TIM-3 positive CD8<sup>+</sup>/CD4<sup>-</sup> cells (validation assay). Cell Dive fractions are computed over sum of all fields of view. Validation assay fractions are computed over the entire tissue (whole slide).

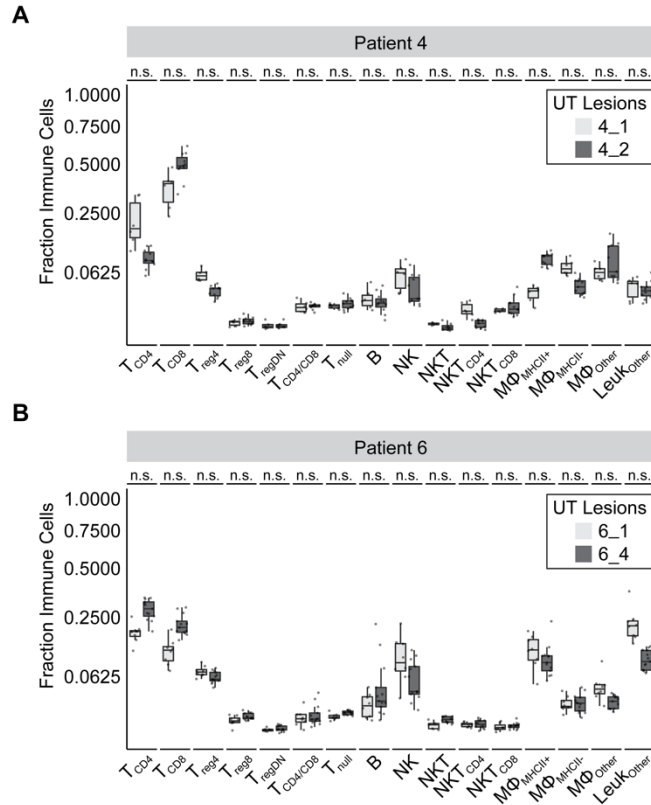

**Supplementary Fig. S7. Untreated lesions from the same patient show a similar immune cell composition.** (A) Box plots (center line: median fraction, box limits: upper and lower quartiles, whiskers: 1.5x interquartile range, points: field of view (FOV) fractions) comparing the fraction of each immune cell type ( $n=16$ ) over total immune cells using a two-sided Wilcoxon test adjusted by Bonferroni correction for untreated (UT) lesions 4\_1 ( $n=6$  FOVs) and 4\_2 ( $n=11$  FOVs) from patient 4 and (B) for UT lesions 6\_1 ( $n=8$  FOVs) and 6\_4 ( $n=13$  FOVs) from patient 6. n.s., not significant ( $p$ -adjusted $>0.001$ ). For exact  $p$ -values, see Supplementary Table S7. For cell type abbreviations, see Supplementary Table S3.

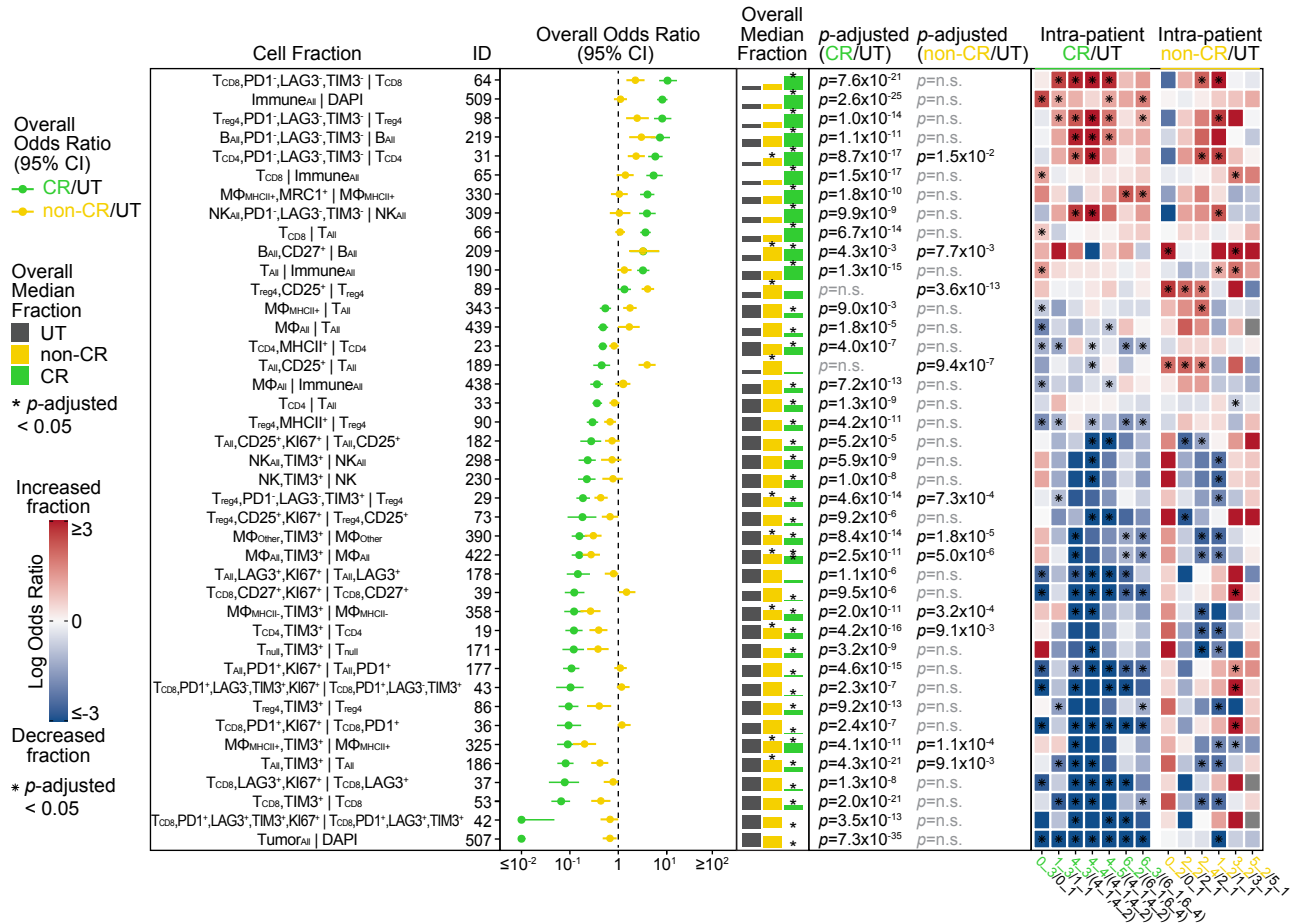

**Supplementary Fig. S8. Intralesional interleukin-2 associated changes in immune cell state fractions.** Shown are cell fractions (rows) with significant changes following interleukin-2 (IL-2) injection. The forest plot shows the overall effect size and 95% confidence interval (CI) of each cell fraction across all patients for complete response (CR) ( $n=101$  fields of view, FOVs) versus untreated ( $n=112$  FOVs) and non-complete response (non-CR) ( $n=120$  FOVs) versus untreated. The overall median fraction, scaled to 1 for the largest fraction, is shown for untreated, non-CR, and CR lesions. Significant results, determined using a two-sided Wilcoxon test adjusted by Bonferroni correction, are indicated with an asterisk above the median fraction with  $p$ -adjusted noted (n.s., not significant). The heatmap indicates the effect size of each cell fraction in the IL-2 injected lesion from a single patient versus the untreated lesion(s) from the same patient. Red denotes an increase in cell fraction, blue denotes a decrease. The asterisks in the heatmap indicate significance when effect size is in the same direction as the overall. The FOV counts for intra-patient CR/UT are 21/12, 13/9, 16/17, 19/17, 15/17, 10/21, 7/21 and for intra-patient non-CR/UT are 22/12, 23/9, 17/14, 21/14, 33/35, 4/4 (in order listed above). See also Supplementary Table S6. See Supplementary Table S3 for full cell type names.

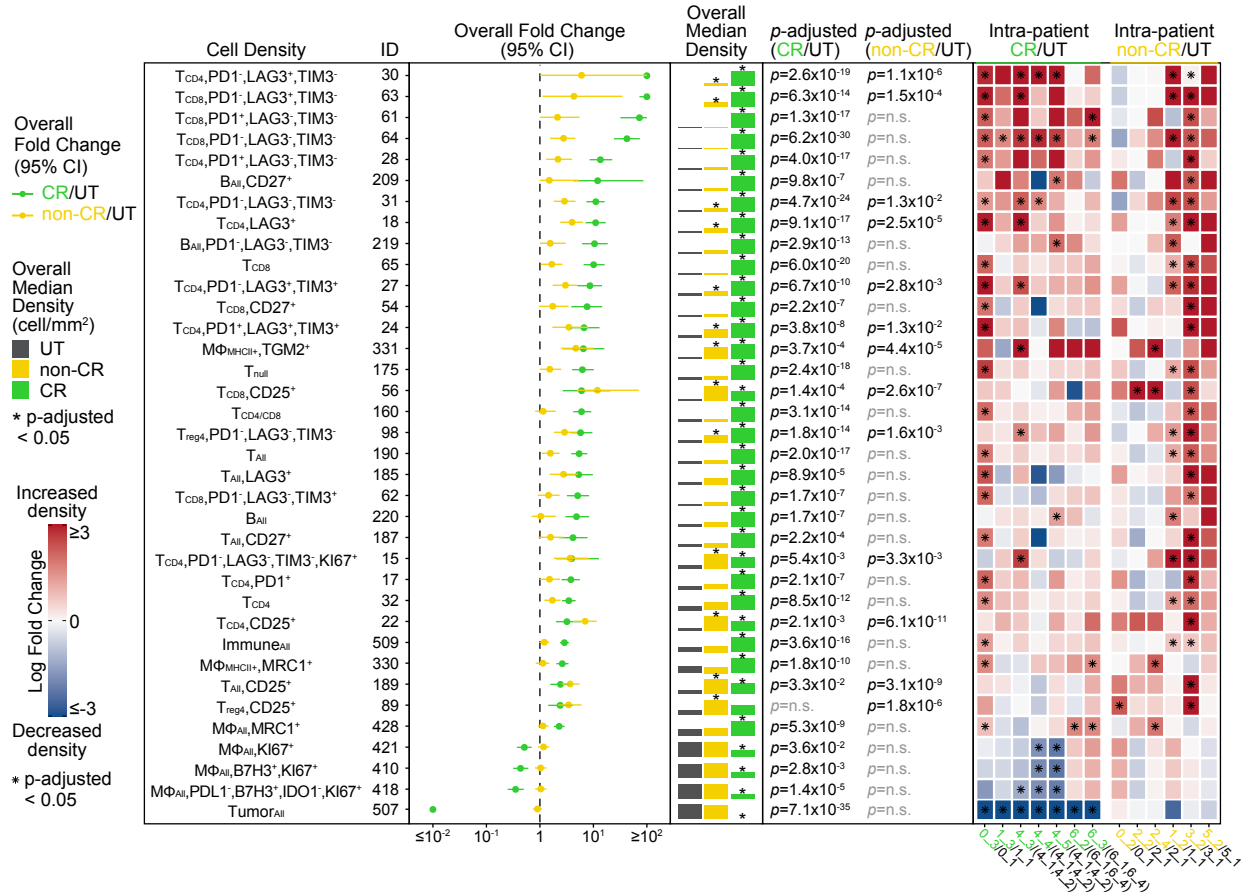

**Supplementary Fig. S9. Intralesional interleukin-2 associated changes in immune cell state densities.** Shown are cell densities (rows) with significant changes following interleukin-2 (IL-2) injection. The forest plot shows the overall effect size and 95% confidence interval (CI) of each cell density across all patients for complete response (CR) ( $n=101$  fields of view, FOVs) versus untreated (UT) ( $n=112$  FOVs) and non-complete response (non-CR) ( $n=120$  FOVs) versus untreated. The overall median density, scaled to 1 for the largest density, is shown for untreated, non-CR, and CR lesions. Significant results, determined using a two-sided Wilcoxon test adjusted by Bonferroni correction, are indicated with an asterisk above the median density with  $p$ -adjusted noted (n.s., not significant). The heatmap indicates the effect size of each cell density in the IL-2 injected lesion from a single patient versus the untreated lesion(s) from the same patient. Red denotes an increase in cell density, blue denotes a decrease. The asterisks in the heatmap indicate significance when effect size is in the same direction as the overall. The FOV counts for intra-patient CR/UT are 21/12, 13/9, 16/17, 19/17, 15/17, 10/21, 7/21 and for intra-patient non-CR/UT are 22/12, 23/9, 17/14, 21/14, 33/35, 4/4 (in order listed above). See also Supplementary Table S8. For cell type abbreviations, see Supplementary Table S3.

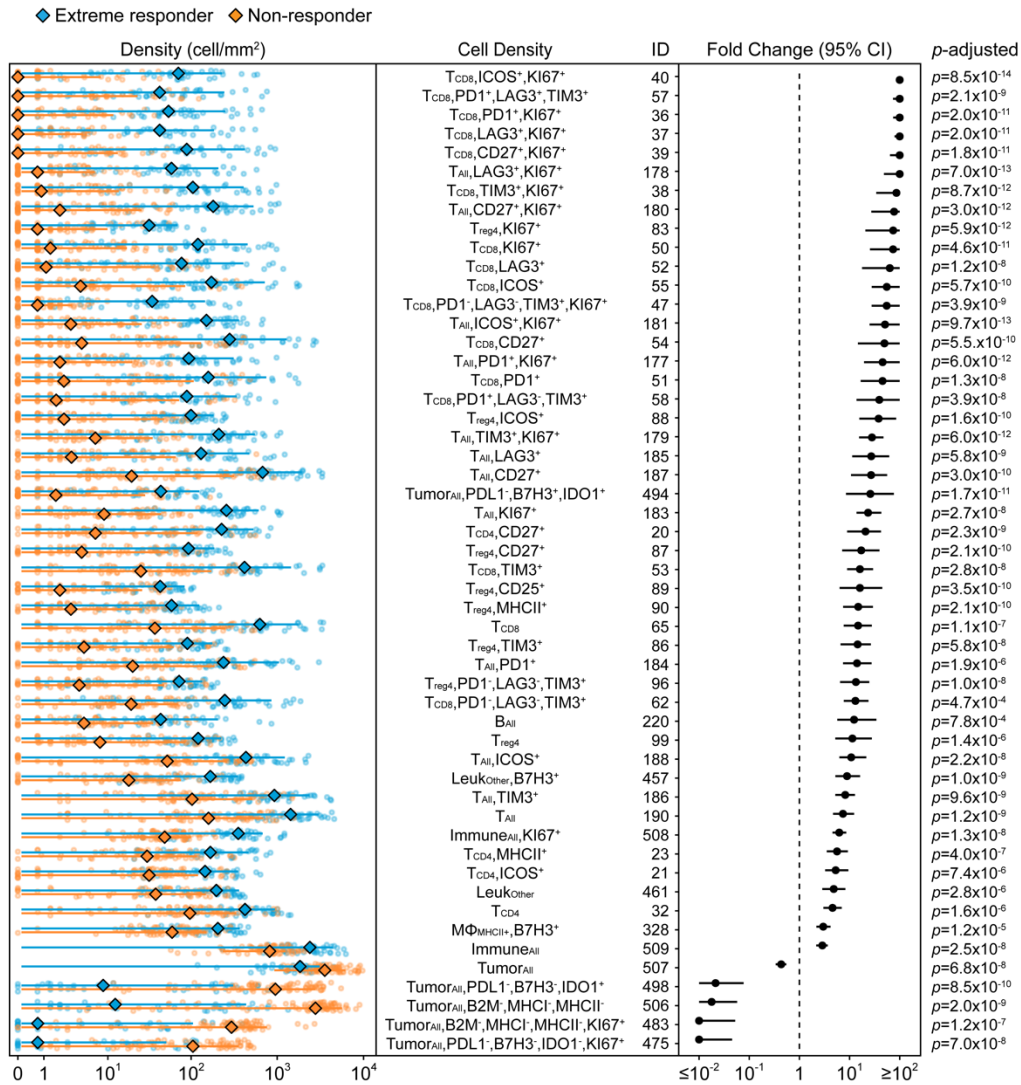

**Supplementary Fig. S10. Determinants of response to intralesional interleukin-2 (cell densities).** Shown are cell densities (rows) with significant differences in untreated lesions from extreme responders ( $n=38$  fields of view, FOVs) versus non-/mixed responders (labeled “non-responder” in figure) ( $n=74$  FOVs). The left panel shows densities in each FOV, with overall median, minimum, and maximum. The forest plot shows effect size and 95% confidence interval (CI) of each cell density with *p*-adjusted, determined using a two-sided Wilcoxon test adjusted by Bonferroni correction, noted. See also Supplementary Table S11. For cell type abbreviations, see Supplementary Table S3.

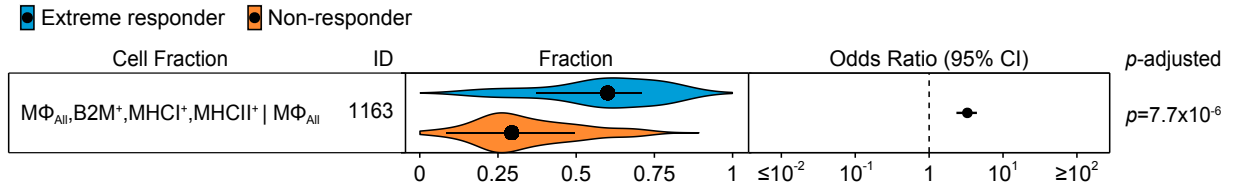

**Supplementary Fig. S11. Expression of B2M/MHC-I/MHC-II in macrophage/monocytes in untreated lesions is associated with IL-2 response.** Violin plot showing fraction of triple-positive B2M/MHC-I/MHC-II macrophage/monocytes in untreated lesions from extreme responders ( $n=38$  fields of view, FOVs) versus non-/mixed responders (labeled “non-responder” in figure) ( $n=74$  FOVs) (with overall median, minimum, and maximum shown). The forest plot shows effect size and 95% confidence interval (CI) with *p*-adjusted noted. See also Supplementary Table S10. See Supplementary Table S3 for full cell type names.

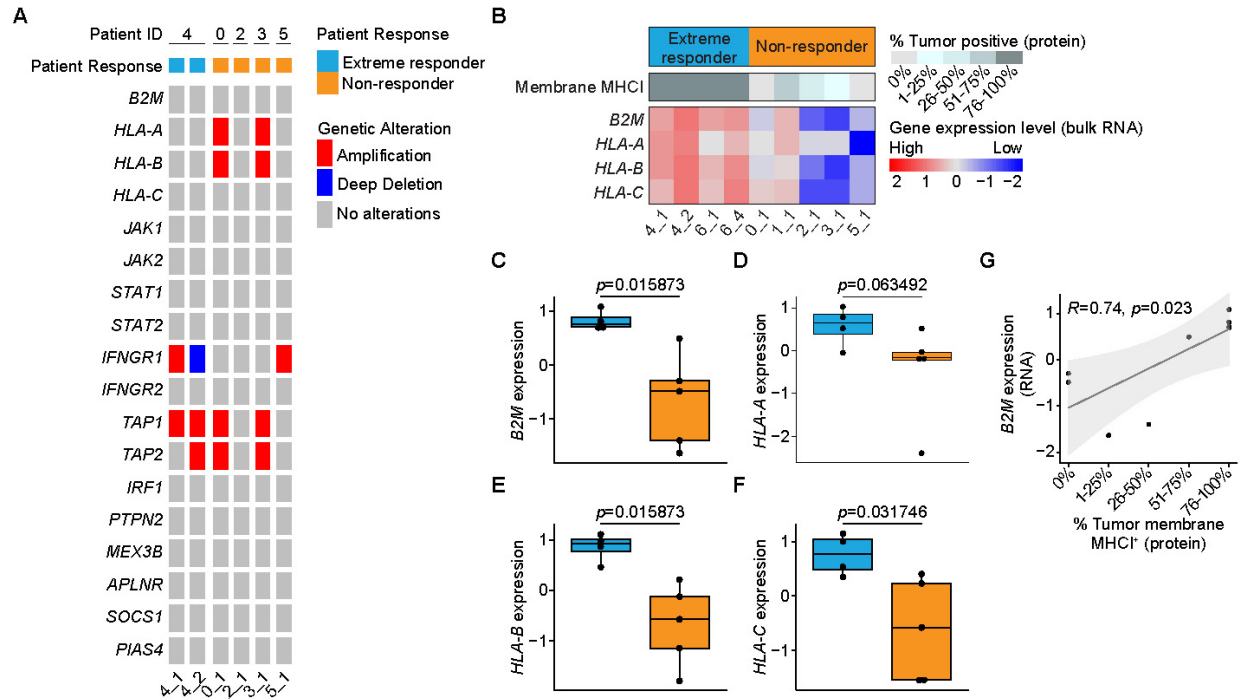

**Supplementary Fig. S12. Increased RNA expression of *B2M* and *HLA* genes in untreated lesions of extreme responders.** (A) Oncoplot showing genetic alterations in antigen presentation pathway genes. “Non-responder” refers to all non-/mixed responder patients. (B) Heatmap showing MHC-I scores and scaled RNA expression values of *B2M*, *HLA-A*, *HLA-B*, and *HLA-C* in untreated lesions from extreme responders and non-/mixed responders. (C) Boxplots showing expression of *B2M*, (D) *HLA-A*, (E) *HLA-B*, and (F) *HLA-C* genes in untreated lesions of extreme responders ( $n=4$ ) and non-/mixed responders ( $n=5$ ).  $p$ -values are derived from a two-sided Wilcoxon test. (G) Correlation (Pearson) of untreated lesion tumor cell MHC-I membrane positivity (%) with *B2M* RNA expression value.

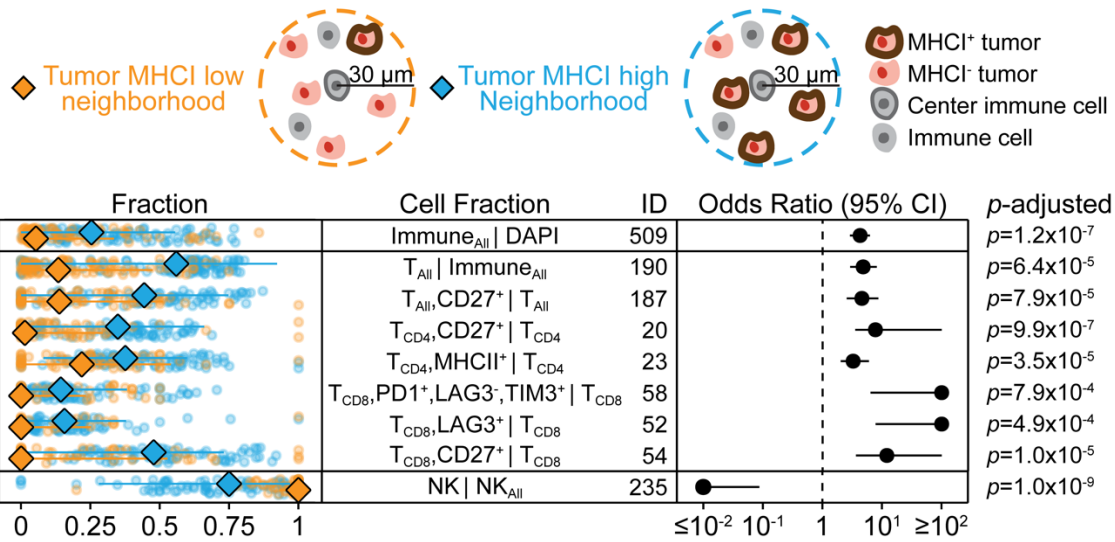

**Supplementary Fig. S13. Activated tumor microenvironment in tumor MHC-I high neighborhoods.** Analysis approach to defining tumor MHC-I high neighborhoods (minimum 75% MHC-I positive tumor cells) and tumor MHC-I low neighborhoods (maximum 25% MHC-I positive tumor cells). Shown are cell fractions (rows) with significant differences in tumor MHC-I high versus tumor MHC-I low neighborhoods from untreated lesions. See also Supplementary Table S14.



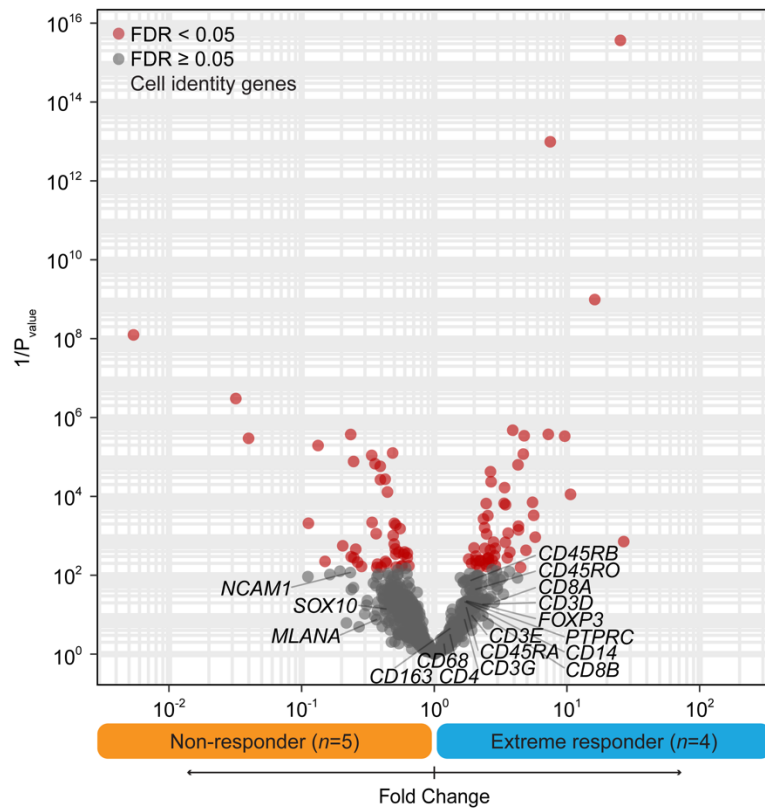

**Supplementary Fig. S14. Untreated lesions of extreme responders and non-/mixed responders exhibit similar expression of cell identity genes.** Volcano plot showing differential expression of genes ( $n=770$ ) in untreated lesions of extreme responders ( $n=4$ ) versus non-/mixed responders (labeled “non-responder” in figure) ( $n=5$ ). Cell identity genes (false discovery rate,  $FDR \geq 0.05$ ) are labeled in black. See also Supplementary Table S15.

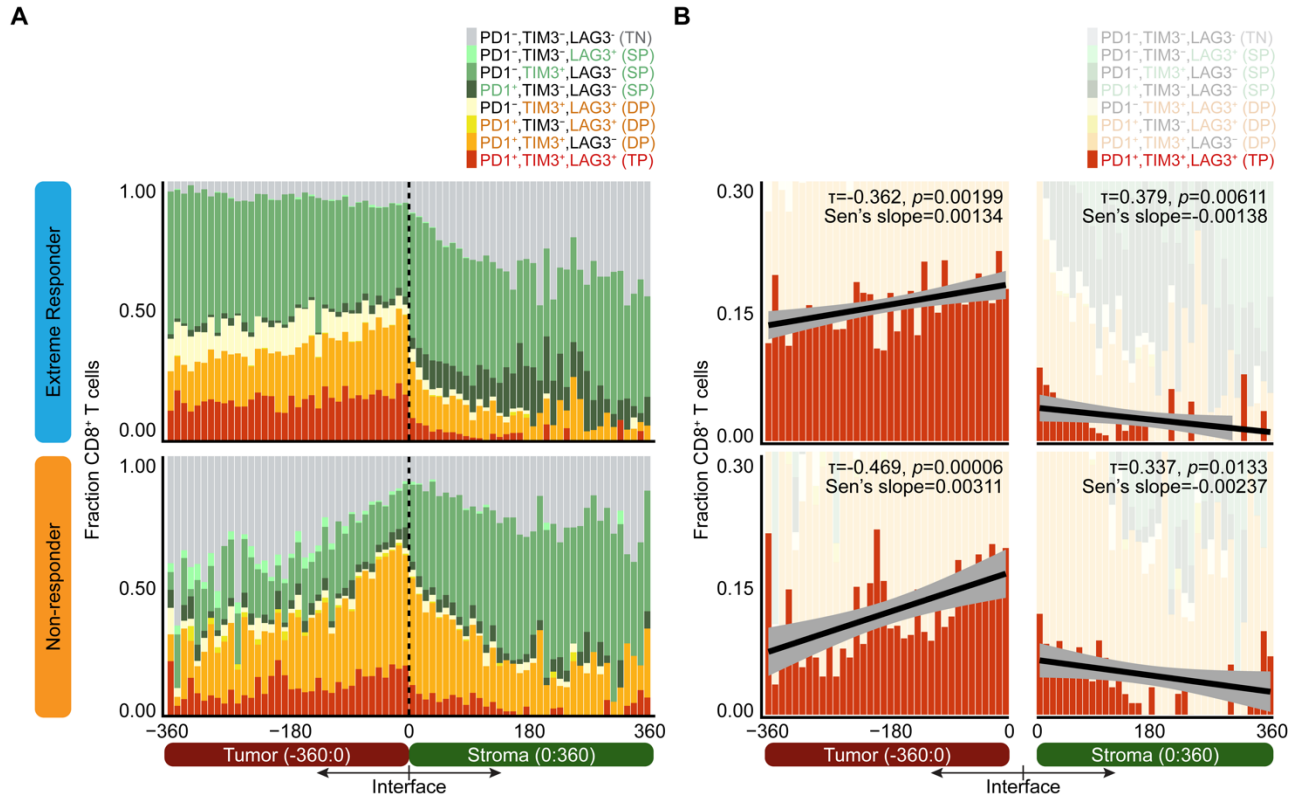

**Supplementary Fig. S15. Fraction of triple positive PD-1/LAG-3/TIM-3 CD8<sup>+</sup> T cells increases as CD8<sup>+</sup> T cells approach the tumor-stroma interface.** (A) Fractional distribution of CD8<sup>+</sup> T cells expressing all combinations of PD-1/TIM-3/LAG-3 in untreated lesions of extreme responders ( $n=31$  fields of view, FOVs) and non-/mixed responders (labeled “non-responder” in figure) ( $n=54$  FOVs) in 10-micron intervals from -360:360-microns. TN, triple negative. SP, single positive. DP, double positive. TP, triple positive. See also Supplementary Table S18. (B) Fraction of CD8<sup>+</sup> T cells triple positive for PD-1/TIM-3/LAG-3 in untreated lesions of extreme responders and non-/mixed responders in 10-micron intervals from -360:0 (tumor) and 0:360 (stroma). Kendall’s tau ( $\tau$ ) and  $p$ -value, determined using a two-sided Mann-Kendall test, and Sen’s slope are noted for each side of the tumor interface (tumor and stroma).

| Patient ID | Age | Gender | Patient Response  | Lesion ID | Lesion Site* | No. IL-2 Injections | Interval IL-2 Injection/Lesion Excision (days) | Lesion Response |
|------------|-----|--------|-------------------|-----------|--------------|---------------------|------------------------------------------------|-----------------|
| 0          | 56  | Male   | Non-Responder     | 0_1       | Left groin   | 0                   | NA                                             | UT              |
|            |     |        |                   | 0_2       | Left foot    | 7                   | 21                                             | non-CR          |
|            |     |        |                   | 0_3       | Left groin   | 3                   | 28                                             | CR              |
| 1          | 81  | Female | Non-Responder     | 1_1       | Right leg    | 0                   | NA                                             | UT              |
|            |     |        |                   | 1_2       | Right leg    | 12                  | 134                                            | non-CR          |
|            |     |        |                   | 1_3       | Right leg    | 2                   | 288                                            | CR              |
| 2          | 67  | Female | Non-Responder     | 2_1       | Right leg    | 0                   | NA                                             | UT              |
|            |     |        |                   | 2_2       | Right leg    | 3                   | 23                                             | non-CR          |
|            |     |        |                   | 2_3       | Right leg    | 3                   | 23                                             | non-CR          |
|            |     |        |                   | 2_4       | Right leg    | 3                   | 23                                             | non-CR          |
| 3          | 86  | Female | Non-Responder     | 3_1       | Left thigh   | 0                   | NA                                             | UT              |
|            |     |        |                   | 3_2       | Left thigh   | 2                   | 126                                            | non-CR          |
| 4          | 42  | Male   | Extreme responder | 4_1       | Right chest  | 0                   | NA                                             | UT              |
|            |     |        |                   | 4_2       | Right chest  | 0                   | NA                                             | UT              |
|            |     |        |                   | 4_3       | Right chest  | 5                   | 7                                              | CR              |
|            |     |        |                   | 4_4       | Right axilla | 4                   | 14                                             | CR              |
|            |     |        |                   | 4_5       | Right arm    | 3                   | 14                                             | CR              |
|            |     |        |                   | 4_6       | Right chest  | 3                   | 21                                             | CR              |
|            |     |        |                   | 4_7       | Right axilla | 4                   | 14                                             | CR              |
| 5          | 69  | Male   | Non-Responder     | 5_1       | Left ear     | 0                   | NA                                             | UT              |
|            |     |        |                   | 5_2       | Left ear     | 4                   | 78                                             | non-CR          |
|            |     |        |                   | 5_3       | Left ear     | 4                   | 78                                             | non-CR          |
|            |     |        |                   | 5_4       | Left ear     | 4                   | 78                                             | non-CR          |
| 6          | 74  | Female | Extreme responder | 6_1       | Right leg    | 0                   | NA                                             | UT              |
|            |     |        |                   | 6_2       | Right leg    | 3                   | 29                                             | CR              |
|            |     |        |                   | 6_3       | Right leg    | 3                   | 29                                             | CR              |
|            |     |        |                   | 6_4       | Right leg    | 0                   | NA                                             | UT              |

\*Each lesion represents a discrete metastasis.

**Supplementary Table S1. Patient characteristics.** Clinical information for 7 patients and 27 in-transit melanoma metastases. Abbreviations: No., number; Non-Responder, Non-/Mixed Responder; IL-2, interleukin-2; NA, not applicable; UT, untreated; non-CR, non-complete response; CR, complete response.

| Antigen | Full/Alternative Name                     | Clone      | Vendor, Catalog          | Peroxide Stability | Dye | Dye/Protein Ratio    | Multiplexed IF Concentration (µg/mL) | IHC Concentration (µg/mL) |
|---------|-------------------------------------------|------------|--------------------------|--------------------|-----|----------------------|--------------------------------------|---------------------------|
| B2M     | Beta-2-Microglobulin                      | Polyclonal | Dako, A007202            | >10                | Cy5 | 2.07                 | 5.0                                  | 0.38                      |
| B7H3    | CD276                                     | D9M2L      | Cell Signaling, 14058    | ≤5                 | Cy3 | 4.73                 | 5.0                                  | 0.13                      |
| CD14    |                                           | EPR3653    | Abcam, ab196169          | >10                | Cy5 | Commerical conjugate | 5.0                                  | 0.58                      |
| CD163   |                                           | EDHu-1     | Bio-Rad, MCA1853         | >10                | Cy3 | 2.57                 | 5.0                                  | 0.04                      |
| CD20    | Pan-B cell antigen                        | EP459Y     | Abcam, ab78237           | >10                | Cy2 | 4.34                 | 5.0                                  | 0.38                      |
| CD25    | Interleukin-2 receptor alpha chain        | 4C9        | LSBio, LS-C311984        | >10                | Cy3 | Primary antibody     | 2.0                                  | 1.00                      |
| CD27    |                                           | EPR8569    | Abcam, ab192336          | ≤5                 | Cy3 | 3.66                 | 10.0                                 | 0.10                      |
| CD3     |                                           | F7.2.38    | Dako, M7254              | >10                | Cy5 | 2.57                 | 5.0                                  | 1.00                      |
| CD4     |                                           | EPR6855    | Abcam, ab133616          | >10                | Cy3 | 3.60                 | 5.0                                  | 0.04                      |
| CD45    | Leukocyte common antigen                  | D9M8I      | Cell Signaling, 13917    | >10                | Cy3 | 4.25                 | 2.5                                  | 1.00                      |
| CD56    | Neural cell adhesion molecule             | MRQ-42     | Cell Marque, 156R-96     | >10                | Cy3 | 4.96                 | 7.5                                  | 0.11                      |
| CD68    |                                           | KP1        | Thermo, MS-397-PABX      | >10                | Cy5 | 3.89                 | 5.0                                  | 2.00                      |
| CD8     |                                           | C8/144B    | Dako, M7103              | >10                | Cy5 | 1.20                 | 5.0                                  | 1.67                      |
| FOXP3   | Forkhead box P3                           | 150D       | BioLegend, 320014        | <3                 | Cy5 | Commerical conjugate | 10.0                                 | 0.08                      |
| ICOS    | CD278/Inducible T Cell Costimulator       | D1K2T      | Cell Signaling, 89601    | >10                | Cy5 | 3.45                 | 10.0                                 | 0.31                      |
| IDO1    | Indoleamine 2,3-Dioxygenase 1             | SP260      | Spring Bioscience, M5604 | >10                | Cy3 | 2.42                 | 10.0                                 | 0.70                      |
| KI67    |                                           | Polyclonal | Thermo, RB-1510-PABX     | >10                | Cy5 | 3.32                 | 10.0                                 | 2.00                      |
| LAG3    | CD223/Lymphocyte Activating 3             | 17B4       | LSBio, LS-C18692         | >10                | Cy3 | 4.75                 | 5.0                                  | 0.10                      |
| MHCI    | Major histocompatibility complex class I  | EMR8-5     | Abcam, ab70328           | >10                | Cy5 | 3.43                 | 5.0                                  | 0.67                      |
| MHCII   | Major histocompatibility complex class II | TAL 1B5    | Thermo, MA1-46109        | >10                | Cy3 | 5.15                 | 5.0                                  | 0.04                      |
| MRC1    | Mannose receptor C-type 1                 | Polyclonal | Abcam, ab64693           | >10                | Cy5 | 1.33                 | 2.5                                  | 2.02                      |
| panCK   | pan-Cytokeratin                           | PCK-26     | Sigma, C5992             | >10                | Cy5 | 1.82                 | 5.0                                  | 2.50                      |
| PD1     | CD279/Programmed cell death protein 1     | NAT105     | Abcam, ab52587           | ≤5                 | Cy5 | Commerical conjugate | 10.0                                 | 2.50                      |
| PDL1    | CD274/Programmed cell death-ligand 1      | E1L3N      | Cell Signaling, 13684    | >10                | Cy5 | 2.27                 | 10.0                                 | 2.02                      |
| S100B   | S100 calcium-binding protein B            | EP1576Y    | Abcam, ab215989          | >10                | Cy3 | 3.06/2.96 (combined) | 10.0                                 | 4.00                      |
| SOX10   | SRY-Box Transcription Factor 10           | Polyclonal | Cell Marque, 383A-75     | >10                | Cy5 | 3.37                 | 5.0                                  | 0.05                      |
| TGM2    | Transglutaminase 2                        | CUB 7482   | Thermo, MA5-12739        | >10                | Cy3 | 3.98                 | 5.0                                  | 1.50                      |
| TIM3    | Hepatitis A virus cellular receptor 2     | D5D5R      | Cell Signaling, 78226    | ≤5                 | Cy5 | Commerical conjugate | 5.0                                  | 0.15                      |

**Supplementary Table S2. Antibody information.** Abbreviations: IF, immunofluorescence; IHC, immunohistochemistry.

| Cell Type                        | Cell Subtype                                  | Abbreviation               | Marker Positives         | Marker Negatives                                             |
|----------------------------------|-----------------------------------------------|----------------------------|--------------------------|--------------------------------------------------------------|
| <b>Tumor<sub>All</sub></b>       | <b>Tumor</b>                                  | Tumor <sub>All</sub>       | SOX10                    | CD3,CD4,CD8,FOXP3,CD20                                       |
| <b>T<sub>All</sub></b>           | <b>CD4<sup>+</sup> T cell</b>                 | T <sub>CD4</sub>           | CD3,CD4                  | CD8,FOXP3,CD20,CD56,SOX10                                    |
|                                  | <b>CD8<sup>+</sup> T cell</b>                 | T <sub>CD8</sub>           | CD3,CD8                  | CD4,FOXP3,CD20,CD56,SOX10                                    |
|                                  | <b>CD4<sup>+</sup> regulatory T cell</b>      | T <sub>reg4</sub>          | CD3,CD4,FOXP3            | CD8,CD20,CD56,SOX10                                          |
|                                  | <b>CD8<sup>+</sup> regulatory T cell</b>      | T <sub>reg8</sub>          | CD3,CD8,FOXP3            | CD4,CD20,CD56,SOX10                                          |
|                                  | <b>Double negative regulatory T cell</b>      | T <sub>regDN</sub>         | CD3,FOXP3                | CD4,CD8,CD20,CD56,SOX10                                      |
|                                  | <b>CD4<sup>+</sup>/CD8<sup>+</sup> T cell</b> | T <sub>CD4/CD8</sub>       | CD3,CD4,CD8              | FOXP3,CD20,CD56,SOX10                                        |
|                                  | <b>T cell/null phenotype</b>                  | T <sub>null</sub>          | CD3                      | CD4,CD8,FOXP3,CD20,CD56,SOX10                                |
| <b>B<sub>All</sub></b>           | <b>B cell</b>                                 | B <sub>All</sub>           | CD20                     | CD3,CD4,CD8,FOXP3,CD56,SOX10                                 |
| <b>NK<sub>All</sub></b>          | <b>Natural killer cell</b>                    | NK                         | CD56                     | CD3,CD4,CD8,FOXP3,CD20,SOX10,S100B                           |
|                                  | <b>Natural killer T cell</b>                  | NKT                        | CD3,CD56                 | CD4,CD8,FOXP3,CD20,SOX10                                     |
|                                  | <b>Natural killer T cell/CD8<sup>+</sup></b>  | NKT <sub>CD8</sub>         | CD3,CD8,CD56             | CD4,FOXP3,CD20,SOX10                                         |
|                                  | <b>Natural killer T cell/CD4<sup>+</sup></b>  | NKT <sub>CD4</sub>         | CD3,CD4,CD56             | CD8,FOXP3,CD20,SOX10                                         |
| <b>MΦ<sub>All</sub></b>          | <b>MHCII<sup>+</sup> macrophage</b>           | MΦ <sub>MHCII+</sub>       | MHCII, CD68 and/or CD163 | CD3,CD8,FOXP3,CD20,CD56,SOX10                                |
|                                  | <b>MHCII<sup>-</sup> macrophage</b>           | MΦ <sub>MHCII-</sub>       | CD68 and/or CD163        | CD3,CD8,FOXP3,CD20,CD56,SOX10,MHCII                          |
|                                  | <b>Other macrophage/monocyte</b>              | MΦ <sub>Other</sub>        | CD14 and/or CD4          | CD3,CD8,FOXP3,CD20,CD56,CD163,CD68,SOX10                     |
| <b>Leukocyte<sub>Other</sub></b> | <b>Other leukocyte</b>                        | Leukocyte <sub>Other</sub> | CD45                     | CD3,CD4,CD8,FOXP3,CD20,CD56,CD14,CD163,CD68,SOX10,S100B      |
| <b>Other</b>                     | <b>Adipocyte or Langerhans cell</b>           | NA                         | S100B                    | CD45,CD3,CD4,CD8,FOXP3,CD20,CD56,CD14,CD163,CD68,SOX10,PCK26 |
|                                  | <b>Epithelial cell</b>                        | NA                         | panCK                    | CD45,CD3,CD4,CD8,FOXP3,CD20,CD56,CD14,CD163,CD68,SOX10,S100B |
|                                  | <b>Nerve</b>                                  | NA                         | CD56,S100B               | CD3,CD4,CD8,FOXP3,CD20,CD14,CD163,CD68,SOX10                 |

**Supplementary Table S3. Use of cell identity markers.** Each cell type is defined by a combination of positive and negative staining results for specific cell identity markers.

| Lesion ID | Cell Count:<br>Cycle 1 | Cell Count:<br>Cycle 32 | Percent Loss | No. Total FOVs | No. Interface<br>FOVs | No. Center<br>FOVs | No. Regressed<br>FOVs | Area Analyzed<br>(mm <sup>2</sup> ) |
|-----------|------------------------|-------------------------|--------------|----------------|-----------------------|--------------------|-----------------------|-------------------------------------|
| 0_1       | 100,339                | 99,168                  | 1.17         | 12             | 8                     | 4                  | 0                     | 17.44                               |
| 0_2       | 188,746                | 186,198                 | 1.35         | 22             | 13                    | 8                  | 1                     | 27.88                               |
| 0_3       | 127,427                | 127,210                 | 0.17         | 21             | 0                     | 0                  | 21                    | 29.58                               |
| 1_1       | 64,208                 | 63,658                  | 0.86         | 9              | 8                     | 1                  | 0                     | 12.52                               |
| 1_2       | 208,388                | 204,483                 | 1.87         | 23             | 16                    | 2                  | 5                     | 31.20                               |
| 1_3       | 60,467                 | 52,065                  | 13.90        | 13             | 0                     | 0                  | 13                    | 18.67                               |
| 2_1       | 100,323                | 91,814                  | 8.48         | 14             | 10                    | 4                  | 0                     | 18.21                               |
| 2_2       | 123,956                | 122,231                 | 1.39         | 17             | 17                    | 0                  | 0                     | 24.09                               |
| 2_4       | 156,872                | 150,570                 | 4.02         | 21             | 17                    | 4                  | 0                     | 29.38                               |
| 3_1       | 344,604                | 342,483                 | 0.62         | 35             | 27                    | 8                  | 0                     | 49.94                               |
| 3_2       | 354,521                | 353,809                 | 0.20         | 33             | 20                    | 13                 | 0                     | 47.44                               |
| 4_1       | 39,045                 | 38,514                  | 1.36         | 6              | 5                     | 1                  | 0                     | 7.06                                |
| 4_2       | 85,832                 | 84,263                  | 1.83         | 11             | 9                     | 2                  | 0                     | 15.21                               |
| 4_3       | 147,179                | 146,997                 | 0.12         | 16             | 0                     | 0                  | 16                    | 23.25                               |
| 4_4       | 127,819                | 127,725                 | 0.07         | 19             | 0                     | 0                  | 19                    | 27.42                               |
| 4_5       | 113,717                | 113,554                 | 0.14         | 15             | 0                     | 0                  | 15                    | 21.80                               |
| 5_1       | 22,625                 | 22,472                  | 0.68         | 4              | 3                     | 1                  | 0                     | 3.88                                |
| 5_2       | 26,635                 | 26,629                  | 0.02         | 4              | 4                     | 0                  | 0                     | 5.08                                |
| 6_1       | 42,208                 | 40,601                  | 3.81         | 8              | 7                     | 1                  | 0                     | 10.92                               |
| 6_2       | 23,104                 | 22,383                  | 3.12         | 10             | 0                     | 0                  | 10                    | 10.61                               |
| 6_3       | 48,366                 | 48,210                  | 0.32         | 7              | 0                     | 0                  | 7                     | 8.53                                |
| 6_4       | 111,372                | 107,592                 | 3.39         | 13             | 10                    | 3                  | 0                     | 17.80                               |

**Supplementary Table S5. Summary of cell loss and fields of view for multiplexed immunofluorescence data.** Abbreviations: No., number; FOVs, fields of view.

| Cohort     | Institution | Patient ID | IL-2 Treatment | Prior Therapies | Patient Response | No. Systemic IL-2 Cycles | No. Intralesional IL-2 Injections |
|------------|-------------|------------|----------------|-----------------|------------------|--------------------------|-----------------------------------|
| Validation | Calgary     | v_01       | Intralesional  | None            | CR               | NA                       | 4                                 |
| Validation | Calgary     | v_02       | Intralesional  | None            | CR               | NA                       | 8                                 |
| Validation | Calgary     | v_03       | Intralesional  | None            | CR               | NA                       | 4                                 |
| Validation | NIH         | v_04       | Systemic       | None            | CR               | 4                        | NA                                |
| Validation | NIH         | v_05       | Systemic       | None            | CR               | 5                        | NA                                |
| Validation | NIH         | v_06       | Systemic       | None            | CR               | 6                        | NA                                |
| Validation | NIH         | v_07       | Systemic       | None            | non-CR           | 1                        | NA                                |
| Validation | NIH         | v_08       | Systemic       | None            | non-CR           | 2                        | NA                                |
| Validation | NIH         | v_09       | Systemic       | None            | non-CR           | 1                        | NA                                |
| Validation | NIH         | v_10       | Systemic       | None            | non-CR           | 2                        | NA                                |
| Validation | NIH         | v_11       | Systemic       | None            | non-CR           | 2                        | NA                                |
| Validation | NIH         | v_12       | Systemic       | None            | non-CR           | 2                        | NA                                |
| Validation | NIH         | v_13       | Systemic       | None            | non-CR           | 2                        | NA                                |
| Validation | MDACC       | v_14       | Systemic       | None            | non-CR           | 2                        | NA                                |
| Validation | MDACC       | v_15       | Systemic       | None            | non-CR           | 2                        | NA                                |
| Validation | MDACC       | v_16       | Systemic       | None            | non-CR           | 2                        | NA                                |
| Validation | MDACC       | v_17       | Systemic       | None            | non-CR           | 2                        | NA                                |
| Validation | JHMI        | v_18       | Systemic       | none            | non-CR           | 6                        | NA                                |
| Validation | JHMI        | v_19       | Systemic       | none            | non-CR           | 4                        | NA                                |

**Supplementary Table S12. Validation cohort patient characteristics.** Clinical information for metastatic melanoma patients in the validation cohort ( $n=19$ ) treated with either intralesional interleukin-2 (IL-2) or high-dose systemic IL-2. Patient response was classified as complete responder (CR) or non-complete responder (non-CR). Abbreviations: Calgary, University of Calgary; NIH, National Institutes of Health; MDACC, MD Anderson Cancer Center; JHMI, Johns Hopkins Medical Institute.

| Lesion ID | Patient Response  | Lesion Response | Mutation Count | Tumor Mutation Burden |
|-----------|-------------------|-----------------|----------------|-----------------------|
| 4_1       | Extreme responder | UT              | 8              | 7.08                  |
| 4_2       | Extreme responder | UT              | 8              | 7.08                  |
| 0_1       | Non-responder     | UT              | 4              | 3.54                  |
| 2_1       | Non-responder     | UT              | 5              | 4.42                  |
| 3_1       | Non-responder     | UT              | 6              | 5.31                  |
| 5_1       | Non-responder     | UT              | 16             | 14.16                 |

**Supplementary Table S16. High tumor mutation burden in untreated lesions is not associated with response to intralesional IL-2.** Tumor mutation burden is measured in mutations per megabase. Abbreviations: Non-responder, Non-/mixed responder; UT, untreated.



## Captions for Supplementary Table Files:

**Supplementary Table S4. List of cell states, cell fractions, and cell densities.** First tab “Summary” includes a summary of cell states. Second tab “Cell\_states” includes the list of 664 cell states. Third tab “Cell\_fractions” includes the list of 685 cell fractions with cell state (numerator) and population (denominator) noted. Fourth tab “Cell\_densities” includes the list of 664 cell densities. Abbreviations: No, number. For cell type abbreviations, see Supplementary Table S3.

**Supplementary Table S6. Interleukin-2 associated changes in cell fractions.** First tab “all\_fractions ( $n=685$ )” includes statistics for all cell fractions in both the overall and intra-patient comparisons of complete response (CR) versus untreated (UT) and non-complete response (non-CR) versus untreated. Second tab “sig\_fractions ( $n=62$ )” includes statistics for statistically significant cell fractions. Third tab “sig\_fractions\_Fig2A\_S8 ( $n=41$ )” includes statistics for statistically significant cell fractions shown in Fig. 2A and Supplementary Fig. S8. “NumSame” refers to the number of intra-patient comparisons with effect size in the same direction as the overall effect size. The number of fields of view (FOVs) included in the analysis: untreated,  $n=112$ ; CR,  $n=101$ ; non-CR,  $n=120$ . All significant cell fractions have a minimum cell state cell count 300, minimum population cell count 1,000, minimum median fraction difference of 10% between comparison groups, and  $FDR < 0.05$  (for at least one of two comparison groups). For cell type abbreviations, see Supplementary Table S3. Abbreviations: OR, odds ratio; CI, 95% confidence interval; FDR, false discovery rate; HMP, harmonic  $p$ -value.

**Supplementary Table S7. Comparison of multiple untreated lesions from the same patient.** Statistics for immune cell fractions from patient 4 are included in the first tab “patient\_4” and from patient 6 are included in the second tab “patient\_6”. For cell type abbreviations, see Supplementary Table S3. Abbreviations: CI, 95% confidence interval.

**Supplementary Table S8. Interleukin-2 associated changes in cell densities.** First tab “all\_densities ( $n=664$ )” includes statistics for all cell densities in both the overall and intra-patient comparisons of complete response (CR) versus untreated (UT) and non-complete response (non-CR) versus untreated. Second tab “sig\_densities ( $n=74$ )” includes statistics for statistically significant cell densities. Third tab “sig\_densities\_FigS9 ( $n=36$ )” includes statistics for statistically significant cell densities shown in Supplementary Fig. S9. “NumSame” refers to the number of intra-patient comparisons with effect size in the same direction as the overall effect size. The number of fields of view (FOVs) included in the analysis: untreated,  $n=112$ ; CR,  $n=101$ ; non-CR,  $n=120$ . All significant cell densities have a minimum cell state cell count 1000, minimum median density difference of 10 between comparison groups, and  $FDR < 0.05$  (for at least one of two comparison groups). For cell type abbreviations, see Supplementary Table S3. Abbreviations: FC, fold change; CI, 95% confidence interval; FDR, false discovery rate; HMP, harmonic  $p$ -value.

**Supplementary Table S9. Differential expression of genes in interleukin-2 injected lesions versus untreated lesions.** First tab “CRvUT\_all\_genes ( $n=770$ )” includes results from differential expression analysis of complete response (CR) lesions versus untreated (UT) lesions for 770 genes in the NanoString IO 360 panel. Second tab “nonCRvUT\_all\_genes ( $n=770$ )”

includes results from differential expression analysis of non-CR lesions versus untreated lesions. Third tab “gene\_annotations” includes different pathways each gene is associated with. Significant differentially expressed genes are defined by  $p$ -adjusted ( $\text{padj}$ ) $<0.0001$ .

**Supplementary Table S10. Determinants of response to intralesional interleukin-2 (cell fractions).** First tab “all\_fractions ( $n=685$ )” includes statistics for all cell fractions in comparison of untreated lesions from extreme responders versus non-/mixed responders (labeled “non-responder throughout table). Second tab “sig\_fractions ( $n=77$ )” includes statistics for statistically significant cell fractions. Third tab “sig\_fractions\_Fig3B ( $n=33$ )” includes statistics for statistically significant cell fractions shown in Fig. 3B. The number of fields of view (FOVs) included in the analysis: extreme responder,  $n=38$ ; non-/mixed responder,  $n=74$ . All significant cell fractions have a minimum cell state cell count 300, minimum population cell count 1,000, minimum median fraction difference of 7% between comparison groups, and  $p$ -adjusted $<0.05$ . For cell type abbreviations, see Supplementary Table S3. Abbreviations: CI, 95% confidence interval.

**Supplementary Table S11. Determinants of response to intralesional interleukin-2 (cell densities).** First tab “all\_densities ( $n=664$ )” includes statistics for all cell densities in comparison of untreated lesions from extreme responders versus non-/mixed responders (labeled “non-responder throughout table). Second tab “sig\_densities ( $n=239$ )” includes statistics for statistically significant cell densities. Third tab “sig\_densities\_FigS10 ( $n=52$ )” includes statistics for statistically significant cell densities shown in Supplementary Fig. S10. The number of fields of view (FOVs) included in the analysis: extreme responder,  $n=38$ ; non-/mixed responder,  $n=74$ . All significant cell densities have a minimum cell state cell count 1000, minimum median density difference of 10 between comparison groups, and  $p$ -adjusted $<0.05$ . For cell type abbreviations, see Supplementary Table S3. Abbreviations: CI, 95% confidence interval.

**Supplementary Table S13. Summary of MHC-I scores in initial and validation cohorts.** First tab “MHCI\_scores” includes the score (fraction of tumor cells with membranous MHC-I positivity) for all patients. Second tab “MHCI\_scores\_summary” includes a summary of MHC-I scores grouped by over 75% tumor cell positive and under 75% tumor cells positive for the initial and validation cohorts. Abbreviations: MSKCC, Memorial Sloan Kettering Cancer Center; Calgary, University of Calgary; NIH, National Institutes of Health; MDACC, MD Anderson Cancer Center; JHMI, Johns Hopkins Medical Institute; CR, complete responder; non-CR, non-complete responder.

**Supplementary Table S14. Comparison of tumor MHC-I high versus tumor MHC-I low cellular neighborhoods.** First tab “all\_fractions ( $n=685$ )” includes statistics for all cell fractions in comparison of tumor MHC-I high versus tumor MHC-I low neighborhoods. Second tab “sig\_fractions ( $n=54$ )” includes statistics for statistically significant cell fractions. Third tab “sig\_fractions\_FigS13 ( $n=9$ )” includes statistics for statistically significant cell fractions shown in Supplementary Fig. S13. All significant cell densities have a minimum cell state cell count 1000, minimum median density difference of 10 between comparison groups, and  $p$ -adjusted $<0.05$ . For cell type abbreviations, see Supplementary Table S3. Abbreviations: CI, 95% confidence interval.

**Supplementary Table S15. Differential expression of genes in untreated lesions from extreme responders versus non-/mixed responders.** First tab “all\_genes ( $n=770$ )” includes results from differential expression analysis of untreated lesions from extreme responders versus non-/mixed responders (labeled “non-responder throughout table) for 770 genes in the NanoString IO 360 panel. Second tab “pathways” includes list of all genes in the annotated pathways in Fig. 4A.

**Supplementary Table S17. Quantification of B cell density and aggregates.** First tab “Fig4C” includes raw data for Fig. 4C. Second tab “Fig4D-E” includes raw data for Fig. 4, D and E. Density is measured in cells per millimeter squared. Abbreviations: FOV, field of view; FDR, false discovery rate.

**Supplementary Table S18. Tumor-stroma interface analysis of CD8<sup>+</sup> T cells expressing all combinations of PD-1/LAG-3/TIM-3.** First tab “Fig4H\_FigS15” includes raw data for Fig. 4H and Supplementary Fig. S15. Second tab “Fig4I” includes raw data for Fig. 4I. Density is measured in cells per millimeter squared. Band is measured in microns. Abbreviations: FOV, field of view; UT, untreated.

**Supplementary Table S19. Cellular neighborhoods of CD8<sup>+</sup> T cells with an exhausted phenotype.** Includes raw data for Fig. 4J. For cell type abbreviations, see Supplementary Table S3. Abbreviations: LO, log odds; LOR, log odds ratio.
